# Supplementary material for: Photoinduced successive oxidative ring-opening and borylation of indolizines with NHC–boranes
Source: Royal Society of Chemistry journal article supplement (doi:10.1039/d1ra08072e), 2021-12-21
Supplement: d1ra08072e1.pdf [file d1ra08072e1.pdf]

Supporting Information

**Photoinduced Successive Oxidative Ring-Opening and Borylation of Indolizines with  
NHC-Boranes**

Guangdong Cosmetics Engineering & Technology Research Center, School of Chemistry and Chemical  
Engineering, Guangdong Pharmaceutical University, Zhongshan 528458, China

**Table of Contents:**

---

|                                                      |     |
|------------------------------------------------------|-----|
| 1. General considerations                            | S2  |
| 2. Experimental procedures and characterization data | S3  |
| 2.1 <i>Experimental procedures</i>                   | S3  |
| 2.2 <i>Characterization data</i>                     | S5  |
| 3. NMR spectra for new compounds                     | S16 |
| 4. X-ray crystallographic data                       | S58 |
| 5. References                                        | S60 |

---

## 1. General considerations

Unless otherwise noted, commercial reagents were purchased from Adamas, Alfa Aesar, TCI, or Maclin and used without further purification. All reactions were carried out using oven-dried glassware and all catalytic reactions proceeded without special care. Column chromatography was performed on 200-300 mesh silica gel (Huanghai, China).

$^1\text{H}$ ,  $^{19}\text{F}$  and  $^{13}\text{C}\{^1\text{H}\}$  NMR spectra were recorded on an Bruker Ascend 400MHz spectrometer and Bruker Ultrashield 300MHz at ambient temperature.  $^1\text{H}$  NMR spectra are referred to the TMS signal ( $\delta = 0$  ppm) and  $^{13}\text{C}$  NMR spectra are referred to the residual solvent signal ( $\delta = 77.16$  ppm). Data for  $^1\text{H}$  NMR are reported as follows: chemical shifts ( $\delta$  ppm), multiplicities (s = singlet, d = doublet, t = triplet, q = quartet, m = multiplet, br = broad), coupling constants (Hz), integration.

Photochemical reaction experiments were carried out on a PL-SX100A Model Multi-channel photochemical reaction instrument (the light source is 20 W blue LED, the working current is 0.5-1.7 A, the input power is 120 W, the temperature is controlled by circulating water cooling, and the stirring speed is 0-1500 r/min). The material of the irradiation vessel is borosilicate glass and it is 3 cm away from the light source. The data of HRMS was carried out on a waters G2-XS high-resolution mass spectrometer (HR-ESI-MS) or Agilent 7250 GC/QTOF.

Note: In the  $^{13}\text{C}$  NMR spectral data, the carbons connected to boron are not listed due to quadrupole broadening and spin-spin coupling with boron.

## 2. Experimental procedures and characterization data

### 2.1 Experimental procedures

#### Synthesis of compounds 1 according to the following procedure<sup>1-2</sup>:

As exemplified for **1a**:

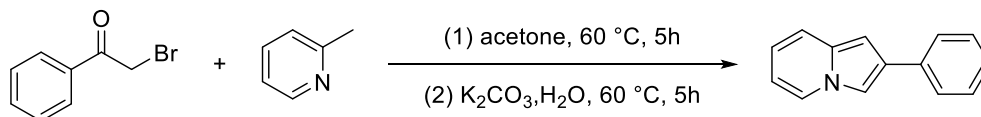

A solution of 2-picoline (0.93 g, 10 mmol, 1.0 equiv.) and 2-bromoacetophenone (1.99 g, 10 mmol, 1.0 equiv.) in acetone (50 mL) were added to a 100 mL round bottom flask and heated with a heating mantle at 60 °C for 5 hours. The precipitate obtained by filtration separation was redissolved in 20 mL of hot water (60 °C). Then, K<sub>2</sub>CO<sub>3</sub> (1.38 g, 10 mmol, 1.0 equiv.) was added and heated at 60 °C for 5 hours. After filtration and drying in vacuo, a white solid compound was obtained in 50% overall yield (0.965 g, 5 mmol) without further purification.

#### Synthesis of NHC-BH<sub>3</sub> compounds 2 according to the following procedure<sup>3</sup>:

As exemplified for **2a**:

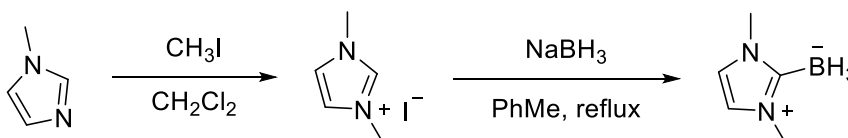

To a mixture of 1-methylimidazole (50 mmol, 1.0 equiv.) in CH<sub>2</sub>Cl<sub>2</sub> (10 mL) was added methyl iodide (60 mmol, 1.2 equiv.) dropwise over 15 min at 0 °C. The mixture was allowed to stir for 2 h at room temperature. The crude product was then obtained after removing the solvent, and directly used for next step without further purification. To a mixture of imidazolium salt (40 mmol, 1.0 equiv) in toluene (40 mL) was added sodium borohydride (48 mmol, 1.2 equiv). The flask was fitted with a cold water condenser and placed in an oil bath at 125-130 °C for 24 h. The hot reaction solvent was cautiously decanted from the insoluble mixture, and the remaining residue was extracted with hot toluene (20 mL × 2 times). The organic extracts were combined, concentrated, and further recrystallized over water to give the pure product as a fine white crystal (3.7 g).

#### Synthesis of products 3 and 4 according to the following procedure:

As exemplified for **3a**:

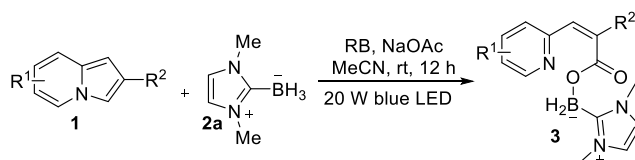

A 25 mL sealed tube was charged with a stirring bar, and added 2-phenylindolizine (**1a**, 38.6 mg, 0.2 mmol), NHC-borane (**2a**, 44 mg, 0.4 mmol), NaOAc (32.8 mg, 0.4 mmol), rose bengal (10 mg, 0.01 mmol), and MeCN (2.0 mL). The reaction was irradiated with a 20W blue LED at room temperature stirring for 12 h and monitored by TLC. The reaction mixture was then diluted with EtOAc and water, extracted with EtOAc. The organic layers were washed with brine and dried over MgSO<sub>4</sub>, evaporated under reduced pressure. The crude mixture was purified by flash column chromatography on silica gel (eluted with petroleum ether : ethyl acetate = 1 : 1) to give **3a** in 72% yield (47.9 mg).

### Scale-up reaction for **3a**:

A 50 mL round bottom flask was charged with a stirring bar, and added 2-phenylindolizine (**1a**, 193 mg, 1 mmol), NHC-borane (**2a**, 220 mg, 2 mmol), NaOAc (164 mg, 2 mmol), rose bengal (50 mg, 0.05 mmol), and MeCN (10.0 mL). The reaction was irradiated with a 20W blue LED at room temperature stirring for 12 h and monitored by TLC. The reaction mixture was then diluted with EtOAc and water, extracted with EtOAc. The organic layers were washed with brine and dried over MgSO<sub>4</sub>, evaporated under reduced pressure. The crude mixture was purified by flash column chromatography on silica gel (eluted with petroleum ether : ethyl acetate = 1 : 1) to give **3a** in 70% yield (222.6 mg).

### On/Off experiment

Standard reactions were set up parallel on a 0.20 mmol scale. After being irradiated for 2 h, an aliquot (150  $\mu$ L) from the reaction mixture was transferred into a nuclear magnetic tube charged with 0.5 mL of CDCl<sub>3</sub>. The yield of product **3a** was determined by <sup>1</sup>H NMR. Then the reaction mixture was stirred for 2 h with light-off. All of the following yields were analyzed in the identical way after a 2 h light on or off.

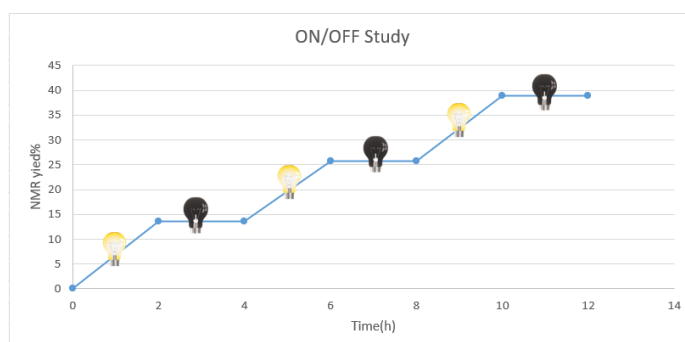

## 2.2 Characterization data

### (1,3-Dimethyl-1*H*-imidazol-3-ium-2-yl)((2-phenyl-3-(pyridin-2-yl)acryloyl)oxy)dihydroborate (3a)

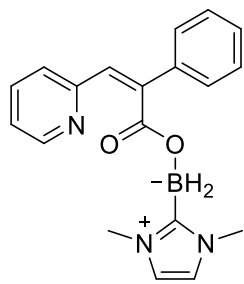

Flash column chromatography on silica gel (eluent: PE/EA = 1/1, v/v) to afford **3a**.

Brown liquid (47.9 mg, 72%). <sup>1</sup>H NMR (400 MHz, CDCl<sub>3</sub>) δ 8.39 (d, *J* = 3.9 Hz, 1H), 7.54 (d, *J* = 8.3 Hz, 3H), 7.43 (d, *J* = 8.0 Hz, 1H), 7.33 – 7.27 (m, 3H), 7.07 – 7.03 (m, 1H), 6.87 (s, 1H), 6.85 (s, 2H), 3.74 (s, 6H). <sup>13</sup>C NMR (100 MHz, CDCl<sub>3</sub>) δ 172.2, 155.0, 149.1, 141.9, 137.2, 136.2, 128.6, 128.3, 126.5, 125.2, 123.1, 121.8,

120.8, 36.2. <sup>11</sup>B NMR (128 MHz, CDCl<sub>3</sub>) δ -13.51. IR (KBr): 3416, 3125, 2954, 1672, 1382, 1113, 778, cm<sup>-1</sup>. HR-ESI-MS (*m/z*): calcd for C<sub>19</sub>H<sub>21</sub>BN<sub>3</sub>O<sub>2</sub> [M + H]<sup>+</sup>: 334.1722, found: 334.1728.

### (1,3-Dimethyl-1*H*-imidazol-3-ium-2-yl)((3-(3-methylpyridin-2-yl)-2-phenylacryloyl)oxy)dihydroborate (3b)

(3b)

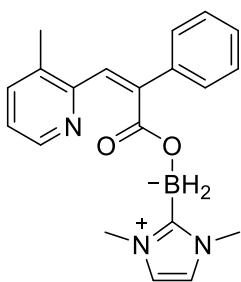

Flash column chromatography on silica gel (eluent: PE/EA = 1/1, v/v) to afford **3b**.

Brown liquid (48.6 mg, 70%). <sup>1</sup>H NMR (400 MHz, CDCl<sub>3</sub>) δ 8.05 (d, *J* = 3.1 Hz, 1H), 7.64 – 7.54 (m, 2H), 7.41 – 7.25 (m, 4H), 6.99 – 6.93 (m, 1H), 6.92 (s, 1H), 6.86 (s, 2H), 3.79 (s, 6H), 2.37 (s, 3H). <sup>13</sup>C NMR (100 MHz, CDCl<sub>3</sub>) δ 172.3, 153.2, 146.2, 142.4, 137.9, 137.5, 131.4, 128.4, 128.1, 126.8, 122.2, 121.7, 120.6, 36.1, 19.0. <sup>11</sup>B

NMR (128 MHz, CDCl<sub>3</sub>) δ -15.51 (t, *J* = 134.7 Hz). IR (KBr): 3416, 3121, 2925, 1671, 1377, 1113, 764, cm<sup>-1</sup>. HR-ESI-MS (*m/z*): calcd for C<sub>20</sub>H<sub>23</sub>BN<sub>3</sub>O<sub>2</sub> [M + H]<sup>+</sup>: 348.1877, found: 348.1865.

### (1,3-Dimethyl-1*H*-imidazol-3-ium-2-yl) (3-(4-methylpyridin-2-yl)-2-phenylacryloyl)oxy)dihydroborate (3c)

(3c)

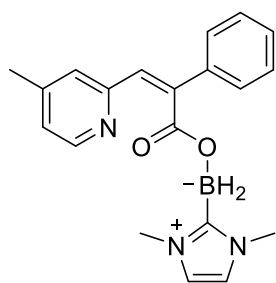

Flash column chromatography on silica gel (eluent: PE/EA = 1/1, v/v) to afford **3c**.

Red brown liquid (50.6 mg, 73%). <sup>1</sup>H NMR (400 MHz, CDCl<sub>3</sub>) δ 8.25 (d, *J* = 5.0 Hz, 1H), 7.57 – 7.50 (m, 2H), 7.37 – 7.27 (m, 5H), 6.90 (d, *J* = 4.5 Hz, 1H), 6.85 (s, 2H), 3.75 (s, 6H), 2.31 (s, 3H). <sup>13</sup>C NMR (100 MHz, CDCl<sub>3</sub>) δ 172.1, 154.7, 148.7, 147.1, 141.5, 137.3, 128.5, 128.1, 126.4, 125.3, 124.0, 122.8, 120.8, 36.,

21.1. <sup>11</sup>B NMR (128 MHz, CDCl<sub>3</sub>) δ -17.23. IR (KBr): 3416, 3163, 2956, 1671, 1301, 1113, 699, cm<sup>-1</sup>.

HR-ESI-MS (*m/z*): calcd for C<sub>20</sub>H<sub>23</sub>BN<sub>3</sub>O<sub>2</sub> [M + H]<sup>+</sup>: 348.1877, found: 348.1891.

**(1,3-Dimethyl-1*H*-imidazol-3-ium-2-yl)((3-(3,5-dimethylpyridin-2-yl)-2-phenylacryloyl)oxy)dihydroborate (3d)**

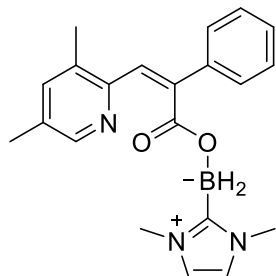

Flash column chromatography on silica gel (eluent: PE/EA = 1/1, v/v) to afford **3d**.

Brown liquid (49.1 mg, 68%). <sup>1</sup>H NMR (400 MHz, CDCl<sub>3</sub>) δ 7.90 (d, *J* = 2.1 Hz, 1H), 7.55 (d, *J* = 7.0 Hz, 2H), 7.35 – 7.28 (m, 3H), 7.19 (s, 1H), 6.89 (s, 1H), 6.85 (s, 2H), 3.77 (s, 6H), 2.33 (s, 3H), 2.23 (s, 3H). <sup>13</sup>C NMR (100 MHz, CDCl<sub>3</sub>) δ

172.5, 150.5, 146.7, 141.6, 138.1, 138.0, 131.1, 130.9, 128.4, 127.9, 126.8, 122.4, 120.6, 36.1, 18.8, 18.2. <sup>11</sup>B NMR (128 MHz, CDCl<sub>3</sub>) δ -14.84. IR (KBr): 3409, 3158, 2958, 1694, 1401, 1082, 771, cm<sup>-1</sup>. HR-ESI-MS (*m/z*): calcd for C<sub>21</sub>H<sub>25</sub>BN<sub>3</sub>O<sub>2</sub> [M + H]<sup>+</sup>: 362.2034, found: 362.2025.

**(1,3-Dimethyl-1*H*-imidazol-3-ium-2-yl)((3-(3,5-dimethylpyridin-2-yl)-2-phenylacryloyl)oxy)dihydroborate (3e)**

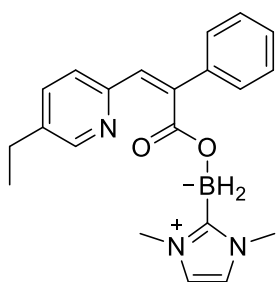

Flash column chromatography on silica gel (eluent: PE/EA = 1/1, v/v) to afford **3e**.

Brown liquid (46.2 mg, 64%). <sup>1</sup>H NMR (400 MHz, CDCl<sub>3</sub>) δ 8.28 (s, 1H), 7.53 (d, *J* = 7.3 Hz, 2H), 7.39 (s, 2H), 7.36 – 7.27 (m, 3H), 6.87 (s, 1H), 6.85 (s, 2H), 3.74 (s, 6H), 2.61 (q, *J* = 7.6 Hz, 2H), 1.23 (t, *J* = 7.6 Hz, 3H). <sup>13</sup>C NMR (100 MHz, CDCl<sub>3</sub>) δ 172.2, 152.4, 148.8, 140.8, 137.4, 137.2, 135.5, 128.5, 128.1, 126.3,

125.2, 122.6, 120.8, 36.0, 25.9, 15.4. <sup>11</sup>B NMR (128 MHz, CDCl<sub>3</sub>) δ -13.76. IR (KBr): 3393, 3117, 2965, 1671, 1380, 1112, 759, cm<sup>-1</sup>. HR-ESI-MS (*m/z*): calcd for C<sub>21</sub>H<sub>25</sub>BN<sub>3</sub>O<sub>2</sub> [M + H]<sup>+</sup>: 362.2034, found: 362.2041.

**(1,3-Dimethyl-1*H*-imidazol-3-ium-2-yl)((3-(4-methoxypyridin-2-yl)-2-phenylacryloyl)oxy)dihydroborate (3f)**

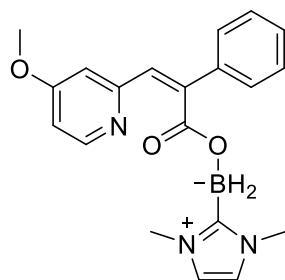

Flash column chromatography on silica gel (eluent: PE/EA = 1/1, v/v) to afford

**3f**. Yellow brown liquid (42.8 mg, 59%). <sup>1</sup>H NMR (400 MHz, CDCl<sub>3</sub>) δ 8.24 (d, *J* = 5.7 Hz, 1H), 7.57 – 7.49 (m, 2H), 7.37 – 7.26 (m, 3H), 7.11 (d, *J* = 2.4 Hz, 1H), 6.86 (s, 1H), 6.85 (s, 2H), 6.65 – 6.61 (m, 1H), 3.87 (s, 3H), 3.74 (s, 6H).

<sup>13</sup>C NMR (100 MHz, CDCl<sub>3</sub>) δ 172.0, 165.9, 156.6, 150.1, 141.9, 137.1, 128.5,

128.3, 126.5, 125.4, 120.9, 109.00, 108.1, 55.3, 36.1. <sup>11</sup>B NMR (128 MHz, CDCl<sub>3</sub>) δ -13.89. IR (KBr): 3323,

3158, 2960, 1581, 1428, 1179, 777,  $\text{cm}^{-1}$ . HR-ESI-MS ( $m/z$ ): calcd for  $\text{C}_{20}\text{H}_{23}\text{BN}_3\text{O}_3$  [ $\text{M} + \text{H}$ ] $^+$ : 364.1827, found: 364.1823.

**3-(3-Bromopyridin-2-yl)-2-phenylacryloyl)oxy)(1,3-dimethyl-1*H*-imidazol-3-ium-2-yl)dihydroborate**

(3g)

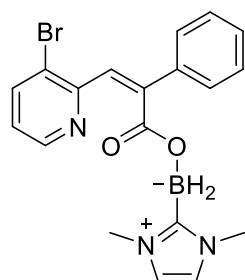

Flash column chromatography on silica gel (eluent: PE/EA = 1/1, v/v) to afford **3g**.

Brown liquid (46.0 mg, 56%).  $^1\text{H}$  NMR (400 MHz,  $\text{CDCl}_3$ )  $\delta$  8.20 (d,  $J = 3.1$  Hz, 1H), 7.78 (d,  $J = 6.5$  Hz, 1H), 7.59 (d,  $J = 6.4$  Hz, 2H), 7.37 – 7.29 (m, 3H), 7.20 (s, 1H), 6.92 (dd,  $J = 8.1, 4.6$  Hz, 1H), 6.86 (s, 2H), 3.79 (s, 6H).  $^{13}\text{C}$  NMR (100 MHz,  $\text{CDCl}_3$ )  $\delta$  171.9, 152.6, 147.1, 144.2, 140.2, 137.2, 128.5, 127.4, 126.9, 122.8, 121.8,

121.1, 120.7, 36.1.  $^{11}\text{B}$  NMR (128 MHz,  $\text{CDCl}_3$ )  $\delta$  -14.72. IR (KBr): 3431, 3143, 2957, 1661, 1430, 1103, 781,  $\text{cm}^{-1}$ . HR-ESI-MS ( $m/z$ ): calcd for  $\text{C}_{19}\text{H}_{20}\text{BBrN}_3\text{O}_2$  [ $\text{M} + \text{H}$ ] $^+$ : 412.0827, found: 412.0837.

**1,3-Dimethyl-1*H*-imidazol-3-ium-2-yl)((3-(pyridin-2-yl)-2-(*p*-tolyl)acryloyl)oxy)dihydroborate (3h)**

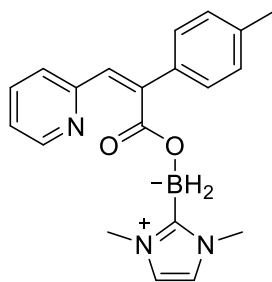

Flash column chromatography on silica gel (eluent: PE/EA = 1/1, v/v) to afford **3h**.

Brown liquid (49.3 mg, 71%).  $^1\text{H}$  NMR (400 MHz,  $\text{CDCl}_3$ )  $\delta$  8.39 (d,  $J = 4.9$  Hz, 1H), 7.57 – 7.53 (m, 1H), 7.46 – 7.41 (m, 3H), 7.14 (d,  $J = 7.9$  Hz, 2H), 7.07 – 7.02 (m, 1H), 6.91 – 6.82 (m, 3H), 3.74 (s, 6H), 2.34 (s, 3H).  $^{13}\text{C}$  NMR (100 MHz,  $\text{CDCl}_3$ )  $\delta$  172.3, 155.1, 149.0, 141.7, 138.2, 136.1, 134.2, 129.2, 126.3, 124.1,

122.9, 121.5, 120.8, 36.1, 21.2.  $^{11}\text{B}$  NMR (128 MHz,  $\text{CDCl}_3$ )  $\delta$  -14.37. IR (KBr): 3416, 3121, 2925, 1671, 1301, 1180, 764,  $\text{cm}^{-1}$ . HR-ESI-MS ( $m/z$ ): calcd for  $\text{C}_{20}\text{H}_{23}\text{BN}_3\text{O}_2$  [ $\text{M} + \text{H}$ ] $^+$ : 348.1877, found: 348.1887.

**1,3-Dimethyl-1*H*-imidazol-3-ium-2-yl)((2-(4-methoxyphenyl)-3-(pyridin-2-yl)acryloyl)oxy)dihydroborate (3i)**

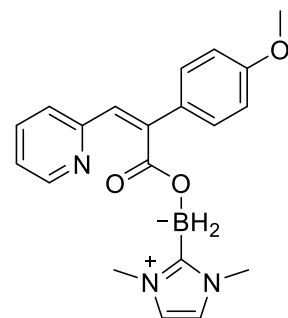

Flash column chromatography on silica gel (eluent: PE/EA = 1/1, v/v) to afford

**3i**. Brown liquid (45.7 mg, 63%).  $^1\text{H}$  NMR (400 MHz,  $\text{CDCl}_3$ )  $\delta$  8.37 (d,  $J = 3.1$  Hz, 1H), 7.58 – 7.43 (m, 4H), 7.39 (d,  $J = 8.0$  Hz, 1H), 7.03 (dd,  $J = 7.5, 5.0$  Hz, 1H), 6.87 (d,  $J = 5.9$  Hz, 3H), 6.79 (s, 1H), 3.80 (s, 3H), 3.73 (s, 6H).  $^{13}\text{C}$  NMR (100 MHz,  $\text{CDCl}_3$ )  $\delta$  172.3, 159.8, 155.1, 148.9, 141.3, 136.1, 129.6, 127.7,

123.1, 122.8, 121.4, 120.8, 113.9, 55.3, 36.0.  $^{11}\text{B}$  NMR (128 MHz,  $\text{CDCl}_3$ )  $\delta$  -13.65. IR (KBr): 3223, 3158, 2960, 1581, 1317, 1179, 777,  $\text{cm}^{-1}$ . HR-ESI-MS ( $m/z$ ): calcd for  $\text{C}_{20}\text{H}_{23}\text{BN}_3\text{O}_3$  [ $\text{M} + \text{H}$ ] $^+$ : 364.1827, found: 364.1838.

**1,3-Dimethyl-1*H*-imidazol-3-ium-2-yl)((2-(4-fluorophenyl)-3-(pyridin-2-yl)acryloyl)oxy)dihydroborate**  
**(3j)**

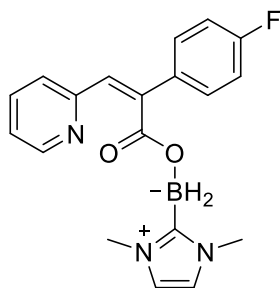

Flash column chromatography on silica gel (eluent: PE/EA = 1/1, v/v) to afford **3j**. Brown liquid (47.1 mg, 67%).  $^1\text{H}$  NMR (400 MHz,  $\text{CDCl}_3$ )  $\delta$  8.38 (d,  $J$  = 3.2 Hz, 1H), 7.61 – 7.50 (m, 3H), 7.40 (d,  $J$  = 7.9 Hz, 1H), 7.09 – 6.98 (m, 3H), 6.87 (s, 2H), 6.80 (s, 1H), 3.75 (s, 6H).  $^{13}\text{C}$  NMR (100 MHz,  $\text{CDCl}_3$ )  $\delta$  171.9, 164.0, 161.5, 154.7, 149.0, 140.7, 136.1, 133.3 (d,  $J$  = 3.3 Hz), 128.2 (d,  $J$  = 8.2 Hz), 124.9, 123.0, 121.7, 120.7, 115.4 (d,  $J$  = 21.6 Hz), 36.0.  $^{11}\text{B}$  NMR (128 MHz,  $\text{CDCl}_3$ )  $\delta$  -14.55. IR (KBr): 3400, 3159, 2927, 1579, 1320, 1171, 777,  $\text{cm}^{-1}$ . HR-ESI-MS ( $m/z$ ): calcd for  $\text{C}_{19}\text{H}_{20}\text{BFN}_3\text{O}_2$  [ $\text{M} + \text{H}$ ] $^+$ : 352.1627, found: 352.1638.

**2-(4-Bromophenyl)-3-(pyridin-2-yl)acryloyl)oxy)(1,3-dimethyl-1*H*-imidazol-3-ium-2-yl)dihydroborate**  
**(3k)**

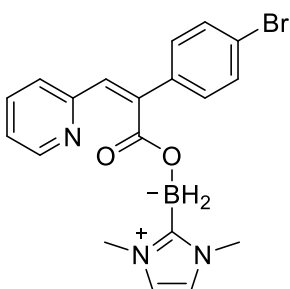

Flash column chromatography on silica gel (eluent: PE/EA = 1/1, v/v) to afford **3k**. Brown liquid (57.5 mg, 70%).  $^1\text{H}$  NMR (400 MHz,  $\text{CDCl}_3$ )  $\delta$  8.38 (d,  $J$  = 4.8 Hz, 1H), 7.57 (d,  $J$  = 1.9 Hz, 1H), 7.48 – 7.39 (m, 5H), 7.08 (d,  $J$  = 4.0 Hz, 1H), 6.87 (s, 2H), 6.85 (s, 1H), 3.74 (s, 6H).  $^{13}\text{C}$  NMR (100 MHz,  $\text{CDCl}_3$ )  $\delta$  171.6, 154.5, 149.0, 140.6, 136.2, 136.1, 131.6, 128.0, 125.4, 123.2, 122.3, 121.9, 120.8, 36.0.  $^{11}\text{B}$  NMR (128 MHz,  $\text{CDCl}_3$ )  $\delta$  -15.18. IR (KBr): 3431, 3143, 2925, 1661, 1315, 1179, 781,  $\text{cm}^{-1}$ . HR-ESI-MS ( $m/z$ ): calcd for  $\text{C}_{19}\text{H}_{20}\text{BBrN}_3\text{O}_2$  [ $\text{M} + \text{H}$ ] $^+$ : 412.0826, found: 412.0837.

**2-(4-Cyanophenyl)-3-(pyridin-2-yl)acryloyl)oxy)(1,3-dimethyl-1*H*-imidazol-3-ium-2-yl)dihydroborate**  
**(3l)**

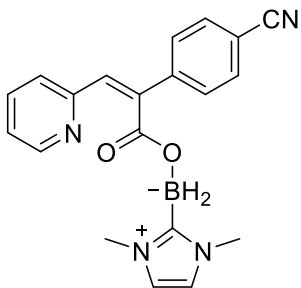

Flash column chromatography on silica gel (eluent: PE/EA = 1/1, v/v) to afford **3l**. Red brown liquid (56.2 mg, 73%).  $^1\text{H}$  NMR (400 MHz,  $\text{CDCl}_3$ )  $\delta$  8.38 (d,  $J$



= 3.4 Hz, 1H), 7.71 – 7.56 (m, 5H), 7.41 (d,  $J = 7.9$  Hz, 1H), 7.14 – 7.08 (m, 1H), 6.93 (s, 1H), 6.90 (s, 2H), 3.76 (s, 6H).  $^{13}\text{C}$  NMR (100 MHz,  $\text{CDCl}_3$ )  $\delta$  171.0, 154.0, 149.1, 141.7, 140.0, 136.2, 132.3, 127.6, 127.0, 123.6, 122.3, 120.8, 118.8, 111.4, 36.0.  $^{11}\text{B}$  NMR (128 MHz,  $\text{CDCl}_3$ )  $\delta$  -14.33. IR (KBr): 3368, 3161, 2227, 1580, 1398, 1176, 923, 776,  $\text{cm}^{-1}$ . HR-ESI-MS ( $m/z$ ): calcd for  $\text{C}_{20}\text{H}_{19}\text{BN}_4\text{NaO}_2$  [ $\text{M} + \text{Na}$ ] $^+$ : 381.1493, found: 381.1495.

**(1,3-Dimethyl-1*H*-imidazol-3-ium-2-yl)((3-(pyridin-2-yl)-2-(4-(trifluoromethyl)phenyl)acryloyl)oxy)dihydroborate (3m)**

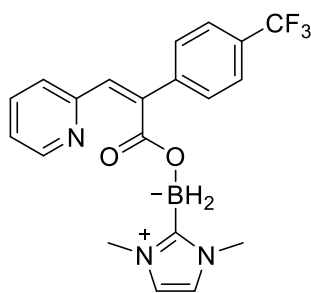

Flash column chromatography on silica gel (eluent: PE/EA = 1/1, v/v) to afford **3m**. Yellow brown liquid (60.1 mg, 75%).  $^1\text{H}$  NMR (400 MHz,  $\text{CDCl}_3$ )  $\delta$  8.39 (d,  $J = 3.3$  Hz, 1H), 7.68 (d,  $J = 8.2$  Hz, 2H), 7.62 – 7.54 (m, 3H), 7.42 (d,  $J = 7.9$  Hz, 1H), 7.14 – 7.05 (m, 1H), 6.92 (s, 1H), 6.88 (s, 2H), 3.74 (s, 6H).  $^{13}\text{C}$  NMR (100 MHz,  $\text{CDCl}_3$ )  $\delta$  171.4, 154.2, 149.0, 140.7, 140.4, 136.2, 129.9 (q,  $J = 32.4$  Hz), 126.9, 126.7, 125.4 (q,  $J = 3.9$  Hz), 123.4, 122.1, 120.8, 36.0.  $^{11}\text{B}$  NMR (128 MHz,  $\text{CDCl}_3$ )  $\delta$  -13.99. IR (KBr): 3338, 3161, 2862, 1582, 1326, 1198, 777,  $\text{cm}^{-1}$ . HR-ESI-MS ( $m/z$ ): calcd for  $\text{C}_{20}\text{H}_{19}\text{BF}_3\text{N}_3\text{NaO}_2$  [ $\text{M} + \text{Na}$ ] $^+$ : 424.1415, found: 424.1410.

**(1,3-Dimethyl-1*H*-imidazol-3-ium-2-yl)((2-(2-fluorophenyl)-3-(pyridin-2-yl)acryloyl)oxy)dihydroborate (3n)**

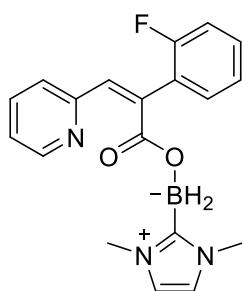

Flash column chromatography on silica gel (eluent: PE/EA = 1/1, v/v) to afford **3n**. Brown liquid (51.2 mg, 73%).  $^1\text{H}$  NMR (400 MHz,  $\text{CDCl}_3$ )  $\delta$  8.47 (d,  $J = 4.9$  Hz, 1H), 7.62 (d,  $J = 1.8$  Hz, 1H), 7.50 (d,  $J = 6.5$  Hz, 2H), 7.15 – 7.08 (m, 2H), 7.07 – 6.96 (m, 3H), 6.85 (s, 2H), 3.76 (s, 6H).  $^{13}\text{C}$  NMR (100 MHz,  $\text{CDCl}_3$ )  $\delta$  171.2, 154.8, 148.9, 136.3, 136.0, 130.7 (d,  $J = 5.3$  Hz), 130.2 (d,  $J = 3.4$  Hz), 129.6 (d,  $J = 8.6$  Hz), 124.2 (d,  $J = 3.5$  Hz), 123.6, 122.0, 120.6, 115.9, 115.7, 36.0.  $^{11}\text{B}$  NMR (128 MHz,  $\text{CDCl}_3$ )  $\delta$  -13.19. IR (KBr): 3400, 3111, 2857, 1579, 1427, 1171, 777,  $\text{cm}^{-1}$ . HR-ESI-MS ( $m/z$ ): calcd for  $\text{C}_{19}\text{H}_{20}\text{BFN}_3\text{O}_2$  [ $\text{M} + \text{H}$ ] $^+$ : 352.1627, found: 352.1618.

**(1,3-Dimethyl-1*H*-imidazol-3-ium-2-yl)((2-(3-methoxyphenyl)-3-(pyridin-2-yl)acryloyl)oxy)dihydroborate (3o)**

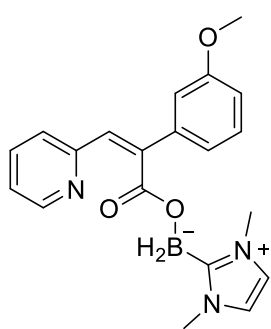

Flash column chromatography on silica gel (eluent: PE/EA = 1/1, v/v) to afford **3o**.

Brown liquid (47.2 mg, 65%). <sup>1</sup>H NMR (400 MHz, CDCl<sub>3</sub>) δ 8.42 (d, *J* = 4.8 Hz, 1H), 7.58 (t, *J* = 7.7 Hz, 1H), 7.46 (d, *J* = 7.9 Hz, 1H), 7.23 (d, *J* = 8.0 Hz, 1H), 7.17 – 7.03 (m, 4H), 6.90 – 6.83 (m, 4H), 3.81 (s, 3H), 3.77 (s, 6H). <sup>13</sup>C NMR (100 MHz, CDCl<sub>3</sub>) δ 171.9, 159.6, 154.8, 149.0, 141.7, 136.1, 129.4, 125.3, 123.0, 121.7, 120.7, 120.7, 119.1, 114.2, 111.6, 55.3, 36.0. <sup>11</sup>B NMR (128 MHz, CDCl<sub>3</sub>)

δ -13.81 (d, *J* = 79.0 Hz). IR (KBr): 3223, 3111, 2960, 1581, 1248, 1179, 777, cm<sup>-1</sup>. HR-ESI-MS (*m/z*): calcd for C<sub>20</sub>H<sub>23</sub>BN<sub>3</sub>O<sub>3</sub> [M + H]<sup>+</sup>: 364.1827, found: 364.1839.

**((1,3-Dimethyl-1H-imidazol-3-ium-2-yl)((2-(3-fluorophenyl)-3-(pyridin-2-yl)acryloyl)oxy)dihydroborate (3p)**

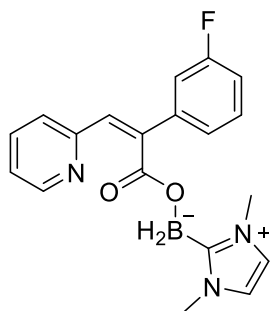

Flash column chromatography on silica gel (eluent: PE/EA = 1/1, v/v) to afford **3p**.

Brown liquid (46.3 mg, 66%). <sup>1</sup>H NMR (400 MHz, CDCl<sub>3</sub>) δ 8.41 (d, *J* = 5.4 Hz, 1H), 7.63 – 7.53 (m, 1H), 7.43 (d, *J* = 6.9 Hz, 1H), 7.39 – 7.30 (m, 2H), 7.22 (d, *J* = 10.5 Hz, 1H), 7.13 – 7.05 (m, 1H), 7.02 – 6.94 (m, 1H), 6.88 (s, 2H), 6.87 (s, 1H), 3.77 (s, 6H). <sup>13</sup>C NMR (100 MHz, CDCl<sub>3</sub>) δ 171.6, 164.0, 161.6, 154.4, 149.1, 140.5 (d, *J* = 2.7 Hz), 139.4 (d, *J* = 7.8 Hz), 136.2, 129.9 (d, *J* = 8.4 Hz), 125.9,

123.2, 122.1 (d, *J* = 2.8 Hz), 121.9, 120.8, 115.1, 114.9, 113.4, 113.1, 36.0. <sup>11</sup>B NMR (128 MHz, CDCl<sub>3</sub>) δ -14.10. IR (KBr): 3400, 3159, 2857, 1579, 1395, 1171, 777, cm<sup>-1</sup>. HR-ESI-MS (*m/z*): calcd for C<sub>19</sub>H<sub>20</sub>BFN<sub>3</sub>O<sub>2</sub> [M + H]<sup>+</sup>: 352.1627, found: 352.1632.

**((2-(3-chlorophenyl)-3-(pyridin-2-yl)acryloyl)oxy)(1,3-dimethyl-1H-imidazol-3-ium-2-yl)dihydroborate (3q)**

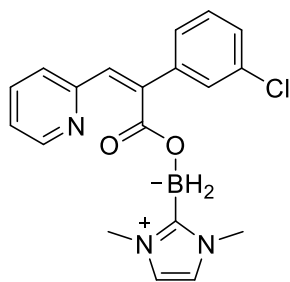

Flash column chromatography on silica gel (eluent: PE/EA = 1/1, v/v) to afford

**3q**. Yellow brown liquid (52.1 mg, 71%). <sup>1</sup>H NMR (400 MHz, CDCl<sub>3</sub>) δ 8.42 (d, *J* = 3.9 Hz, 1H), 7.67 – 7.53 (m, 1H), 7.51 – 7.40 (m, 3H), 7.27 (d, *J* = 2.8 Hz, 2H), 7.12 – 7.06 (m, 1H), 6.89 (s, 2H), 6.86 (s, 1H), 3.78 (s, 6H). <sup>13</sup>C NMR (100 MHz, CDCl<sub>3</sub>) δ 171.5, 154.4, 149.1, 140.3, 139.0, 136.2, 134.3, 129.7, 128.1,

126.4, 126.1, 124.6, 123.2, 122.0, 120.8, 36.1. <sup>11</sup>B NMR (128 MHz, CDCl<sub>3</sub>) δ -15.02. IR (KBr): 3413, 3050,

2925, 1661, 1381, 1179, 781,  $\text{cm}^{-1}$ . HR-ESI-MS ( $m/z$ ): calcd for  $\text{C}_{19}\text{H}_{19}\text{BCIN}_3\text{NaO}_2$  [ $\text{M} + \text{H}$ ] $^+$ : 390.1151, found: 390.1168.

**((2-(3-Bromophenyl)-3-(pyridin-2-yl)acryloyl)oxy)(1,3-dimethyl-1*H*-imidazol-3-ium-2-yl)dihydroborate (3r)**

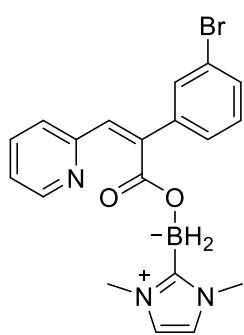

Flash column chromatography on silica gel (eluent: PE/EA = 1/1, v/v) to afford **3r**. Yellow brown liquid (60.0mg, 73%).  $^1\text{H}$  NMR (400 MHz,  $\text{CDCl}_3$ )  $\delta$  8.42 (d,  $J = 4.1$  Hz, 1H), 7.64 – 7.55 (m, 2H), 7.51 (d,  $J = 7.9$  Hz, 1H), 7.47 – 7.38 (m, 2H), 7.21 (t,  $J = 7.9$  Hz, 1H), 7.13 – 7.02 (m, 1H), 6.88 (s, 2H), 6.85 (s, 1H), 3.77 (s, 6H).  $^{13}\text{C}$  NMR (100 MHz,  $\text{CDCl}_3$ )  $\delta$  171.4, 154.3, 149.1, 140.2, 139.4, 136.2, 131.0, 130.0, 129.3, 126.2, 125.0, 123.2, 122.5, 122.0, 120.8, 36.0.  $^{11}\text{B}$  NMR (128 MHz,  $\text{CDCl}_3$ )  $\delta$  -13.83.

IR (KBr): 3431, 3143, 2957, 1661, 1381, 1103, 781,  $\text{cm}^{-1}$ . HR-ESI-MS ( $m/z$ ): calcd for  $\text{C}_{19}\text{H}_{20}\text{BBrN}_3\text{O}_2$  [ $\text{M} + \text{H}$ ] $^+$ : 412.0826, found: 412.0825.

**((2-(3,4-Dichlorophenyl)-3-(pyridin-2-yl)acryloyl)oxy)(1,3-dimethyl-1*H*-imidazol-3-ium-2-yl)dihydroborate (3s)**

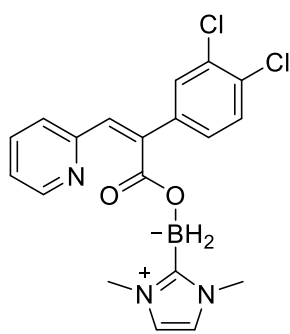

Flash column chromatography on silica gel (eluent: PE/EA = 1/1, v/v) to afford **3s**. Brown liquid (56.1mg, 70%).  $^1\text{H}$  NMR (400 MHz,  $\text{CDCl}_3$ )  $\delta$  8.41 (d,  $J = 5.0$  Hz, 1H), 7.66 – 7.51 (m, 2H), 7.47 – 7.35 (m, 3H), 7.16 – 7.03 (m, 1H), 6.89 (s, 2H), 6.84 (s, 1H), 3.78 (s, 6H).  $^{13}\text{C}$  NMR (100 MHz,  $\text{CDCl}_3$ )  $\delta$  171.2, 154.1, 149.1, 139.3, 137.3, 136.2, 132.5, 132.0, 130.4, 128.2, 126.4, 125.7, 123.3, 122.1, 120.8, 36.1.  $^{11}\text{B}$  NMR (128 MHz,  $\text{CDCl}_3$ )  $\delta$  -14.39. IR (KBr): 3119, 2956, 1672, 1473, 1112, 743,  $\text{cm}^{-1}$ . HR-ESI-MS ( $m/z$ ): calcd for  $\text{C}_{19}\text{H}_{19}\text{BCl}_2\text{N}_3\text{O}_2$  [ $\text{M} + \text{H}$ ] $^+$ : 402.0942, found: 402.0942.

**((2-(2,4-Dichlorophenyl)-3-(pyridin-2-yl)acryloyl)oxy)(1,3-dimethyl-1*H*-imidazol-3-ium-2-yl)dihydroborate (3t)**

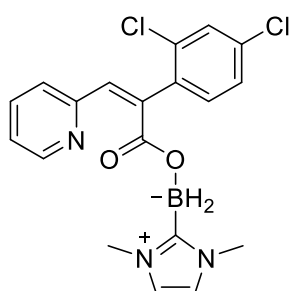

Flash column chromatography on silica gel (eluent: PE/EA = 1/1, v/v) to afford **3t**. Brown liquid (57.7mg, 72%).  $^1\text{H}$  NMR (400 MHz,  $\text{CDCl}_3$ )  $\delta$  8.54 – 8.47 (m, 1H), 7.67 – 7.54 (m, 2H), 7.44 (d,  $J = 8.3$  Hz, 1H), 7.36 (d,  $J = 2.1$  Hz, 1H), 7.24

(dd,  $J = 8.3, 2.2$  Hz, 1H), 7.18 – 7.10 (m, 1H), 6.82 (s, 2H), 6.79 (s, 1H), 3.71 (s, 6H).  $^{13}\text{C}$  NMR (100 MHz,  $\text{CDCl}_3$ )  $\delta$  169.7, 154.4, 148.9, 138.1, 137.2, 135.8, 134.2, 134.0, 133.7, 132.0, 129.3, 127.1, 124.0, 122.3, 120.7, 36.0.  $^{11}\text{B}$  NMR (128 MHz,  $\text{CDCl}_3$ )  $\delta$  -13.92. IR (KBr): 3162, 2926, 1672, 1368, 1112, 776,  $\text{cm}^{-1}$ . HR-ESI-MS ( $m/z$ ): calcd for  $\text{C}_{19}\text{H}_{19}\text{BCl}_2\text{N}_3\text{O}_2$  [ $\text{M} + \text{H}$ ] $^+$ : 402.0942, found: 402.0941.

**((1,3-Dimethyl-1*H*-imidazol-3-ium-2-yl)((2-(4-fluorophenyl)-3-(3-methylpyridin-2-yl)acryloyl)oxy)dihydroborate (3u)**

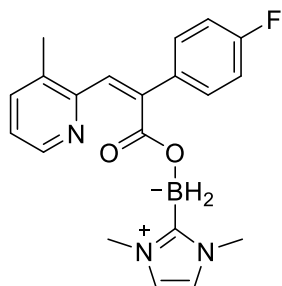

Flash column chromatography on silica gel (eluent: PE/EA = 1/1, v/v) to afford **3u**. Brown liquid (45.2mg, 62%).  $^1\text{H}$  NMR (400 MHz,  $\text{CDCl}_3$ )  $\delta$  8.02 (d,  $J = 3.1$  Hz, 1H), 7.61 – 7.50 (m, 2H), 7.38 (d,  $J = 6.7$  Hz, 1H), 7.03 (t,  $J = 8.7$  Hz, 2H), 6.95 (dd,  $J = 7.6, 4.7$  Hz, 1H), 6.87 (s, 2H), 6.86 (s, 1H), 3.77 (s, 6H), 2.37 (s, 3H).  $^{13}\text{C}$  NMR (100 MHz,  $\text{CDCl}_3$ )  $\delta$  172.1, 163.9, 161.5, 153.0, 146.1, 141.3, 137.5, 134.1 (d,  $J = 3.2$  Hz), 131.4, 128.5 (d,  $J = 8.1$  Hz), 122.1 (d,  $J = 1.7$  Hz), 121.7, 120.6, 115.4, 115.2, 36.0, 18.9.  $^{11}\text{B}$  NMR (128 MHz,  $\text{CDCl}_3$ )  $\delta$  -15.27. IR (KBr): 3382, 3161, 2927, 1576, 1397, 1167, 778,  $\text{cm}^{-1}$ . HR-ESI-MS ( $m/z$ ): calcd for  $\text{C}_{20}\text{H}_{22}\text{BFN}_3\text{O}_2$  [ $\text{M} + \text{H}$ ] $^+$ : 366.1784, found: 366.1779.

**((2-(4-Chlorophenyl)-3-(3-methylpyridin-2-yl)acryloyl)oxy)(1,3-dimethyl-1*H*-imidazol-3-ium-2-yl)dihydroborate (3v)**

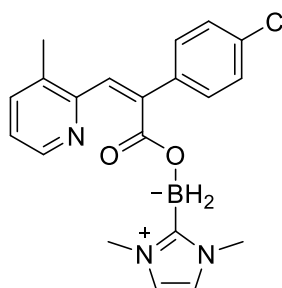

Flash column chromatography on silica gel (eluent: PE/EA = 1/1, v/v) to afford **3v**. Red brown liquid (48.7mg, 64%).  $^1\text{H}$  NMR (400 MHz,  $\text{CDCl}_3$ )  $\delta$  8.03 (d,  $J = 4.0$  Hz, 1H), 7.52 (d,  $J = 8.5$  Hz, 2H), 7.38 (d,  $J = 7.6$  Hz, 1H), 7.33 – 7.29 (m, 2H), 7.00 – 6.92 (m, 1H), 6.90 (s, 1H), 6.87 (s, 2H), 3.78 (s, 6H), 2.37 (s, 3H).  $^{13}\text{C}$  NMR (100 MHz,  $\text{CDCl}_3$ )  $\delta$  171.9, 152.9, 146.1, 141.2, 137.5, 136.4, 133.9, 131.5, 128.5, 128.1, 122.6, 121.9, 120.6, 36., 18.9.  $^{11}\text{B}$  NMR (128 MHz,  $\text{CDCl}_3$ )  $\delta$  -15.46. IR (KBr): 3400, 3120, 2956, 1671, 1376, 1113, 831,  $\text{cm}^{-1}$ . HR-ESI-MS ( $m/z$ ): calcd for  $\text{C}_{20}\text{H}_{21}\text{BClN}_3\text{NaO}_2$  [ $\text{M} + \text{Na}$ ] $^+$ : 404.1308, found: 404.1303.

**((2-(3-Chlorophenyl)-3-(4-methylpyridin-2-yl)acryloyl)oxy)(1,3-dimethyl-1*H*-imidazol-3-ium-2-yl)dihydroborate (3w)**

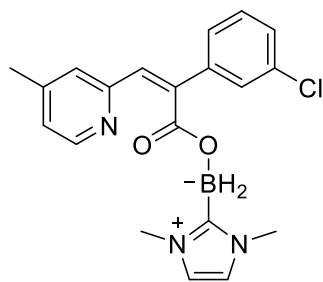

Flash column chromatography on silica gel (eluent: PE/EA = 1/1, v/v) to afford **3w**. Brown solid (52.5mg, 69%). <sup>1</sup>H NMR (400 MHz, CDCl<sub>3</sub>) δ 8.25 (d, *J* = 5.0 Hz, 1H), 7.49 – 7.40 (m, 2H), 7.36 – 7.25 (m, 3H), 6.91 (d, *J* = 5.1 Hz, 1H), 6.87 (s, 2H), 6.83 (s, 1H), 3.75 (s, 6H), 2.31 (s, 3H). <sup>13</sup>C NMR (100 MHz, CDCl<sub>3</sub>) δ 171.5, 154.1, 148.8, 147.2, 140.0, 139.1, 134.2, 129.7, 128.0, 126.4, 126.3, 124.5, 124.2, 123.1, 120.8, 36.0, 21.0. <sup>11</sup>B NMR (128 MHz, CDCl<sub>3</sub>) δ -13.72. IR (KBr): 3400, 3120, 2926, 1671, 1299, 1113, 800, cm<sup>-1</sup>. HR-ESI-MS (*m/z*): calcd for C<sub>20</sub>H<sub>22</sub>BClN<sub>3</sub>O<sub>2</sub> [M + H]<sup>+</sup>: 382.1488, found: 382.1492.

**((2-(3-Bromophenyl)-3-(4-methoxypyridin-2-yl)acryloyl)oxy)(1,3-dimethyl-1H-imidazol-3-ium-2-yl)dihydroborate (3x)**

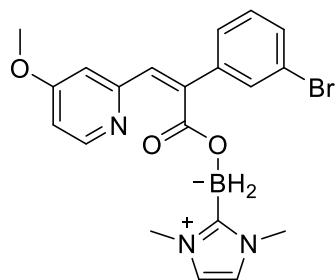

Flash column chromatography on silica gel (eluent: PE/EA = 1/1, v/v) to afford **3x**. Brown liquid (52.0mg, 59%). <sup>1</sup>H NMR (400 MHz, CDCl<sub>3</sub>) δ 8.25 (d, *J* = 5.7 Hz, 1H), 7.57 (d, *J* = 1.9 Hz, 1H), 7.50 (d, *J* = 7.0 Hz, 1H), 7.41 (d, *J* = 6.9 Hz, 1H), 7.24 – 7.18 (m, 1H), 7.10 (d, *J* = 2.3 Hz, 1H), 6.88 (s, 2H), 6.84 (s, 1H), 6.65 (d, *J* = 3.4 Hz, 1H), 3.87 (s, 3H), 3.78 (s, 6H). <sup>13</sup>C NMR (100 MHz, CDCl<sub>3</sub>) δ 171.4, 165.9, 156.0, 150.1, 140.3, 139.2, 131.0, 130.0, 129.3, 126.5, 125.0, 122.5, 120.8, 109.2, 108.3, 55.2, 36.0. <sup>11</sup>B NMR (128 MHz, CDCl<sub>3</sub>) δ -14.43. IR (KBr): 3423, 3124, 2956, 1671, 1309, 1112, 786, cm<sup>-1</sup>. HR-ESI-MS (*m/z*): calcd for C<sub>20</sub>H<sub>22</sub>BBrN<sub>3</sub>O<sub>3</sub> [M + H]<sup>+</sup>: 442.0932, found: 442.0940.

**((2-(3,4-Dichlorophenyl)-3-(3-methylpyridin-2-yl)acryloyl)oxy)(1,3-dimethyl-1H-imidazol-3-ium-2-yl)dihydroborate (3y)**

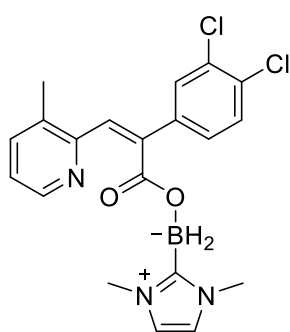

Flash column chromatography on silica gel (eluent: PE/EA = 1/1, v/v) to afford **3y**. Brown liquid (52.3mg, 63%). <sup>1</sup>H NMR (400 MHz, CDCl<sub>3</sub>) δ 8.07 (d, *J* = 4.6 Hz, 1H), 7.61 (d, *J* = 2.1 Hz, 1H), 7.47 – 7.35 (m, 3H), 7.02 – 6.95 (m, 1H), 6.91 (s, 1H), 6.89 (s, 2H), 3.79 (s, 6H), 2.38 (s, 3H). <sup>13</sup>C NMR (100 MHz, CDCl<sub>3</sub>) δ 171.4, 152.5, 146.2, 140.0, 138.1, 137.6, 132.4, 131.8, 131.7, 130.3, 128.5, 126.2, 123.7, 122.1, 120.7, 36.1, 18.9. <sup>11</sup>B NMR (128 MHz, CDCl<sub>3</sub>) δ -14.38. IR (KBr): 3400, 3163, 2956, 1671, 1376, 1113, 775, cm<sup>-1</sup>. HR-ESI-MS (*m/z*): calcd for C<sub>20</sub>H<sub>21</sub>BCl<sub>2</sub>N<sub>3</sub>O<sub>2</sub> [M + H]<sup>+</sup>: 416.1098, found: 416.1113.

**(1,3-Dimethyl-1*H*-imidazol-3-ium-2-yl)((3-(3,5-dimethylpyridin-2-yl)-2-(4-fluorophenyl)acryloyl)oxy)dihydroborate (3z)**

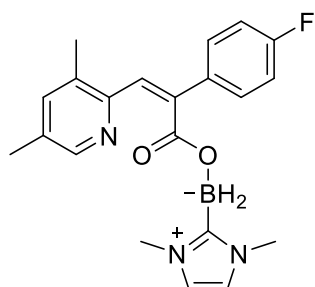

Flash column chromatography on silica gel (eluent: PE/EA = 1/1, v/v) to afford **3z**. Brown liquid (50.8mg, 67%). <sup>1</sup>H NMR (400 MHz, CDCl<sub>3</sub>) δ 7.88 (d, *J* = 2.1 Hz, 1H), 7.58 – 7.46 (m, 2H), 7.22 – 7.16 (m, 1H), 7.02 (t, *J* = 8.6 Hz, 2H), 6.87 (s, 2H), 6.83 (s, 1H), 3.78 (s, 6H), 2.33 (s, 3H), 2.23 (s, 3H). <sup>13</sup>C NMR (100 MHz, CDCl<sub>3</sub>) δ 172.3, 163.8, 161.4, 150.3, 146.6, 140.4, 138.1, 134.2 (d, *J* = 3.4 Hz), 131.2, 130.8, 128.4 (d, *J* = 8.1 Hz), 122.3, 120.6, 115.4, 115.1. <sup>11</sup>B NMR (128 MHz, CDCl<sub>3</sub>) δ -15.09. IR (KBr): 3388, 3165, 2926, 1671, 1380, 1231, 841, cm<sup>-1</sup>. HR-ESI-MS (*m/z*): calcd for C<sub>21</sub>H<sub>24</sub>BFN<sub>3</sub>O<sub>2</sub> [*M* + *H*]<sup>+</sup>: 380.1940, found: 380.1938.

**(1,3-Dimethyl-1*H*-imidazol-3-ium-2-yl)((2-(naphthalen-2-yl)-3-(pyridin-2-yl)acryloyl)oxy)dihydroborate (3aa)**

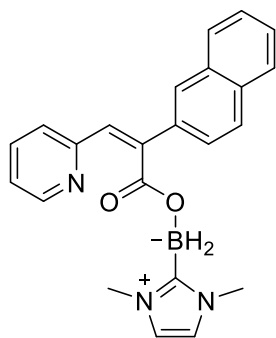

Flash column chromatography on silica gel (eluent: PE/EA = 1/1, v/v) to afford **3aa**. Brown liquid (53.6mg, 70%). <sup>1</sup>H NMR (400 MHz, CDCl<sub>3</sub>) δ 8.44 (d, *J* = 4.0 Hz, 1H), 7.94 – 7.90 (m, 1H), 7.84 – 7.76 (m, 3H), 7.74 (d, *J* = 8.7 Hz, 1H), 7.60 (t, *J* = 8.6 Hz, 1H), 7.50 (d, *J* = 8.0 Hz, 1H), 7.47 – 7.43 (m, 2H), 7.13 – 7.04 (m, 1H), 7.03 (s, 1H), 6.86 (s, 2H), 3.75 (s, 6H). <sup>13</sup>C NMR (100 MHz, CDCl<sub>3</sub>) δ 172.1, 154.89, 149.1, 141.6, 136.2, 134.3, 133.3, 133.1, 128.4, 128.1, 127.5, 126.3 – 126.0 (m), 125.4, 123.9, 123.1, 121.7, 120.7, 36.1. <sup>11</sup>B NMR (128 MHz, CDCl<sub>3</sub>) δ -14.20. IR (KBr): 3417, 3160, 2923, 1581, 1381, 1175, 756, cm<sup>-1</sup>. HR-ESI-MS (*m/z*): calcd for C<sub>23</sub>H<sub>23</sub>BN<sub>3</sub>O<sub>2</sub> [*M* + *H*]<sup>+</sup>: 384.1878, found: 384.1870.

**(1-Isopropyl-3-methyl-1*H*-imidazol-3-ium-2-yl)((2-phenyl-3-(pyridin-2-yl)acryloyl)oxy)dihydroborate (4a)**

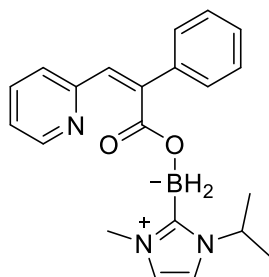

Flash column chromatography on silica gel (eluent: PE/EA = 1/1, v/v) to afford **4a**. Brown liquid (52.7mg, 73%). <sup>1</sup>H NMR (400 MHz, CDCl<sub>3</sub>) δ 8.45 (d, *J* = 5.6 Hz, 1H), 7.56 (d, *J* = 7.9 Hz, 3H), 7.50 (d, *J* = 7.9 Hz, 1H), 7.37 – 7.27 (m, 3H), 7.11 – 7.03 (m, 1H), 6.96 (d, *J* = 1.9 Hz, 1H), 6.89 (s, 1H), 6.87 (s, 1H), 5.22 – 5.06 (m,

1H), 3.72 (s, 3H), 1.29 (d,  $J = 6.7$  Hz, 6H).  $^{13}\text{C}$  NMR (100 MHz,  $\text{CDCl}_3$ )  $\delta$  171.9, 154.8, 149.1, 141.8, 137.0, 136.1, 128.4, 128.2, 126.4, 125.2, 122.8, 121.7, 121.3, 115.4, 50.0, 35.9, 23.02.  $^{11}\text{B}$  NMR (128 MHz,  $\text{CDCl}_3$ )  $\delta$  -15.17. IR (KBr): 3457, 2925, 1672, 1378, 1109, 778,  $\text{cm}^{-1}$ . HR-ESI-MS ( $m/z$ ): calcd for  $\text{C}_{21}\text{H}_{25}\text{BN}_3\text{O}_2$  [ $\text{M} + \text{H}$ ] $^+$ : 362.2034, found: 362.2030.

### 3. NMR spectra for new compounds

$^1\text{H}$  NMR and  $^{13}\text{C}$  NMR spectrum of compound **3a**

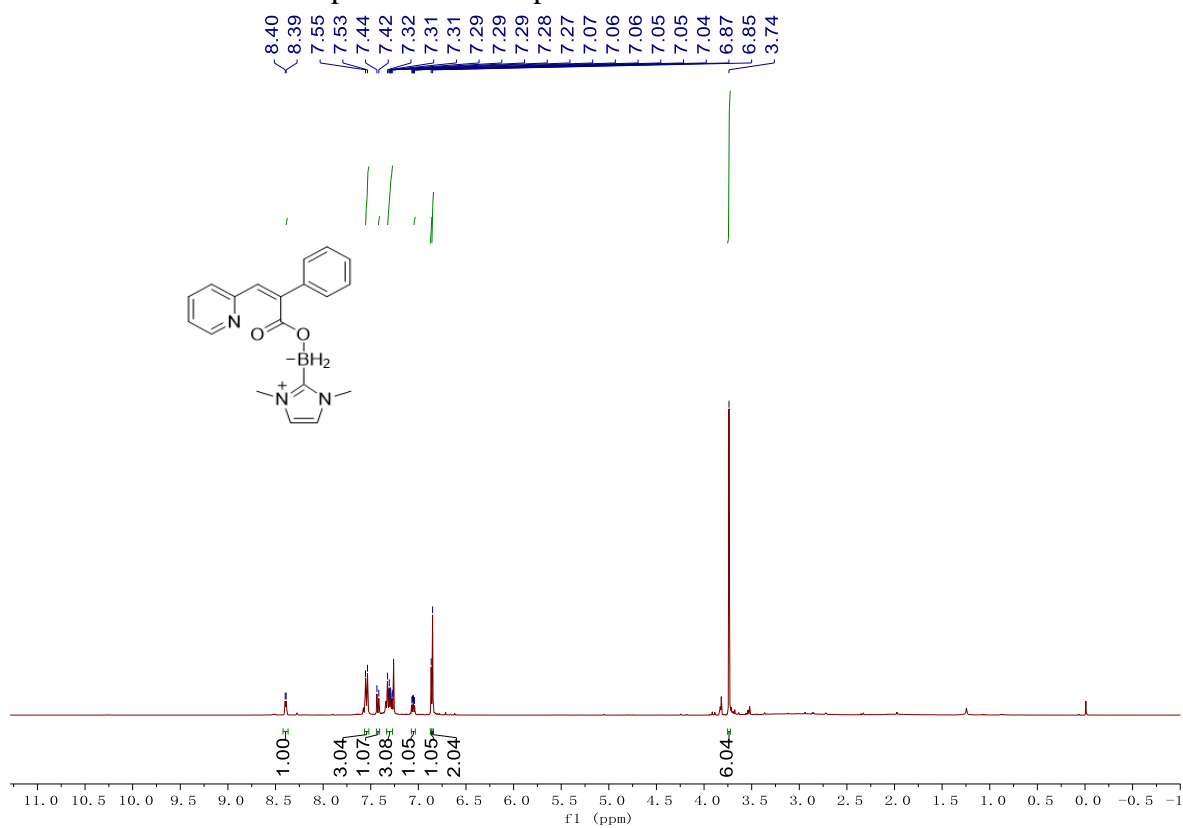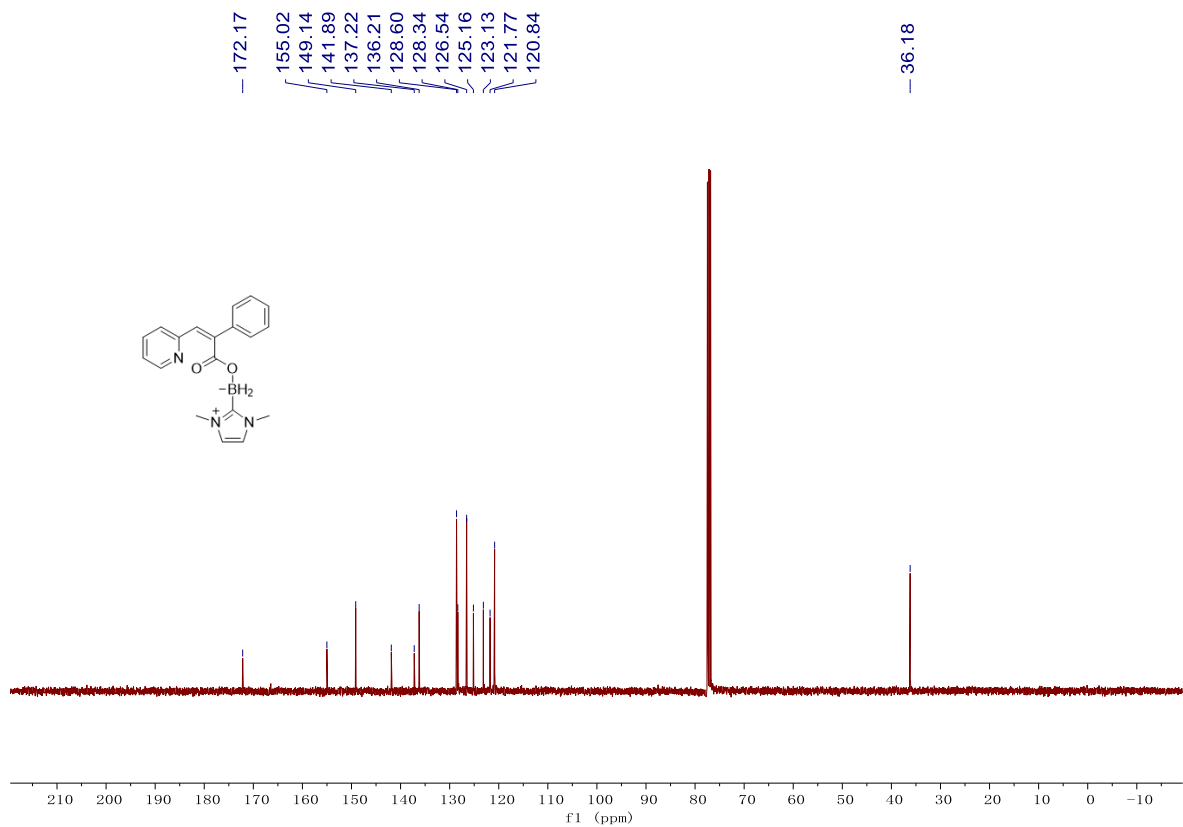

$^{11}\text{B}$  NMR spectrum of compound **3a**



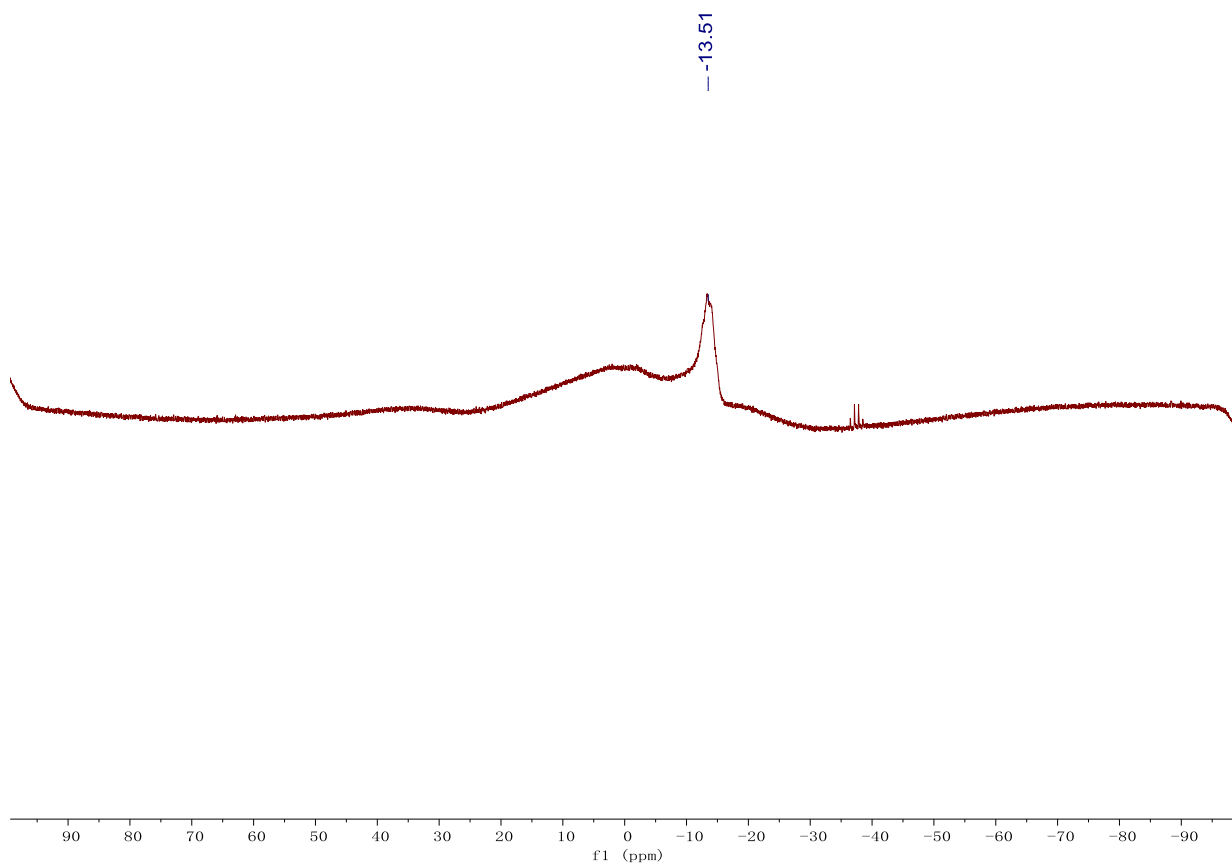

<sup>1</sup>H NMR and <sup>13</sup>C NMR spectrum of compound **3b**

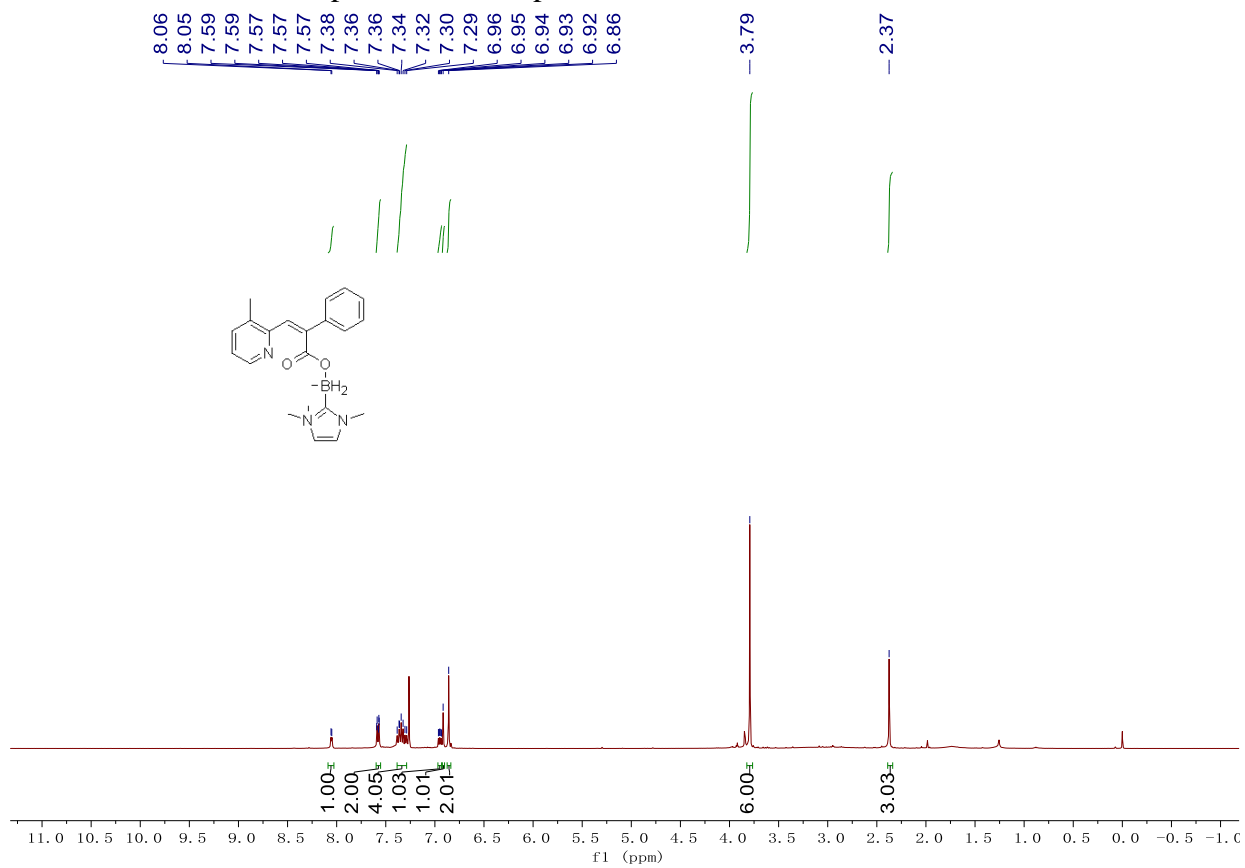

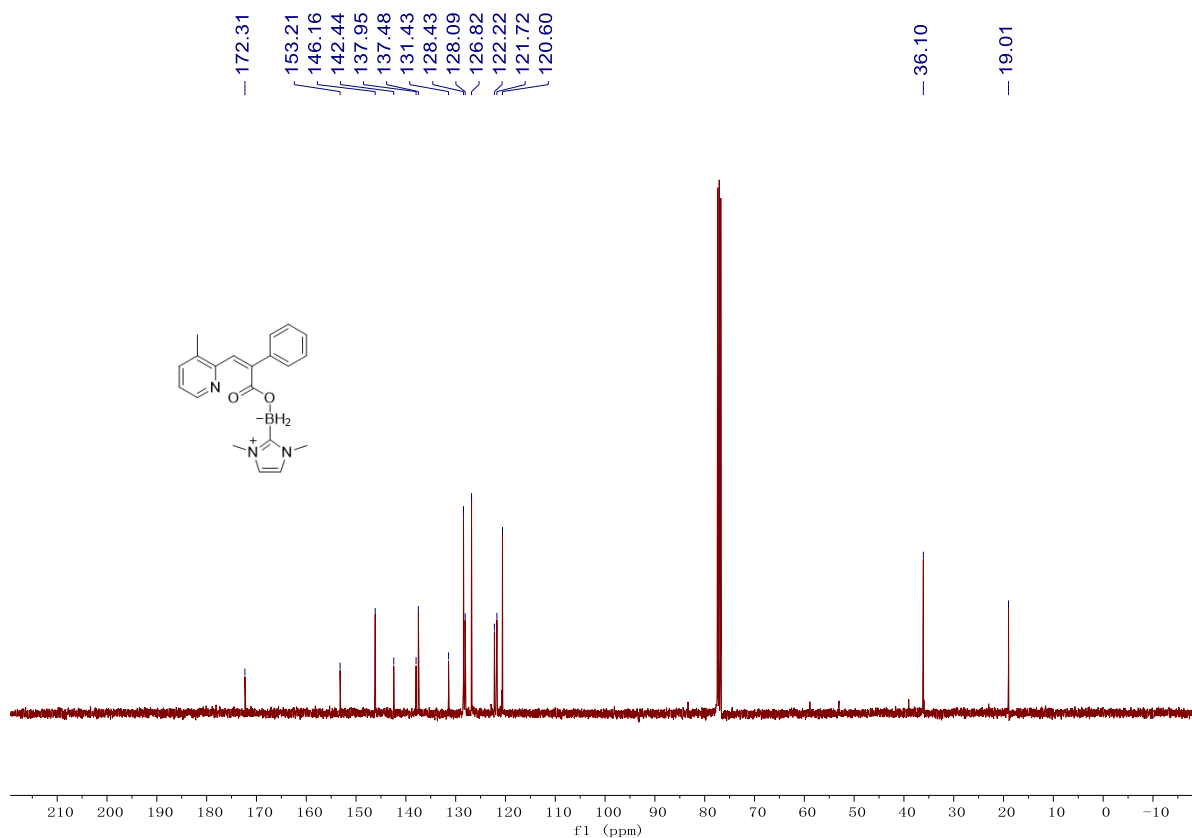

<sup>11</sup>B NMR spectrum of compound **3b**

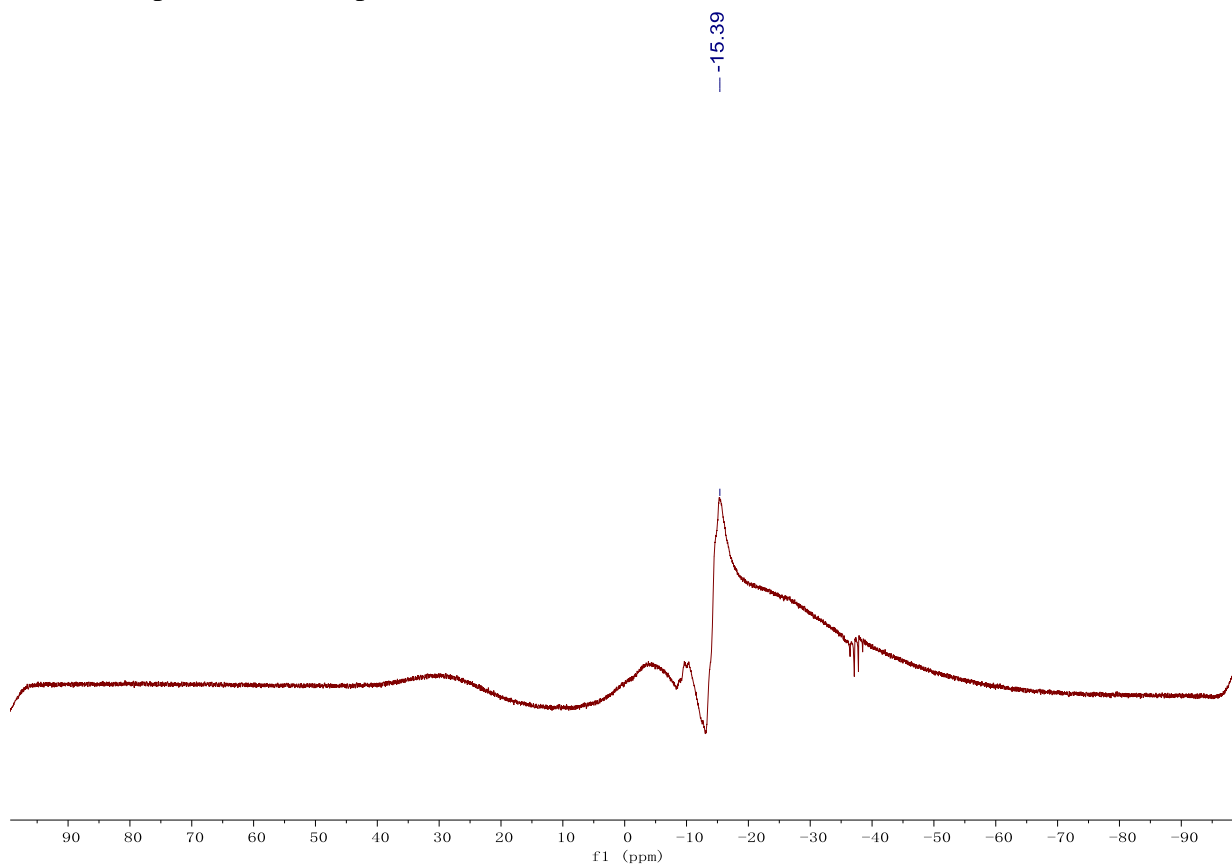

<sup>1</sup>H NMR and <sup>13</sup>C NMR spectrum of compound **3c**

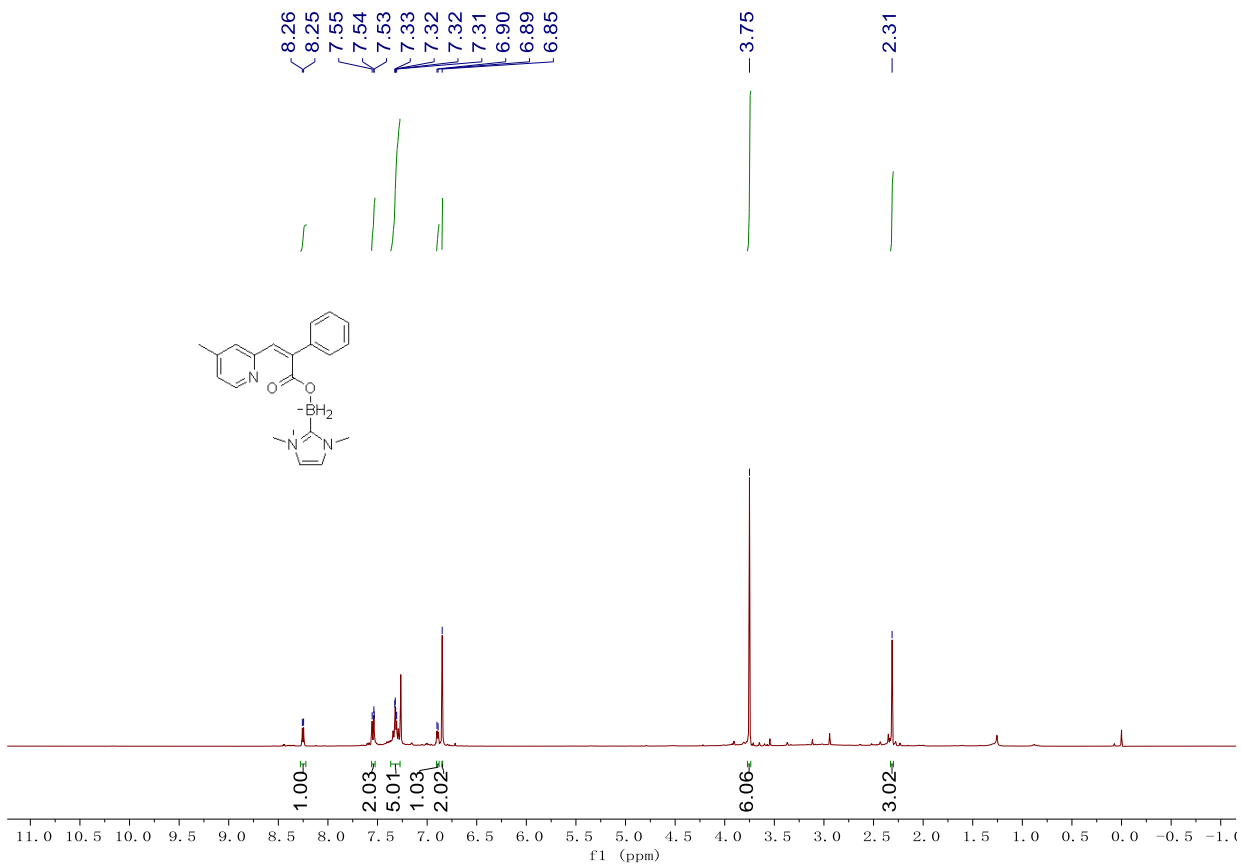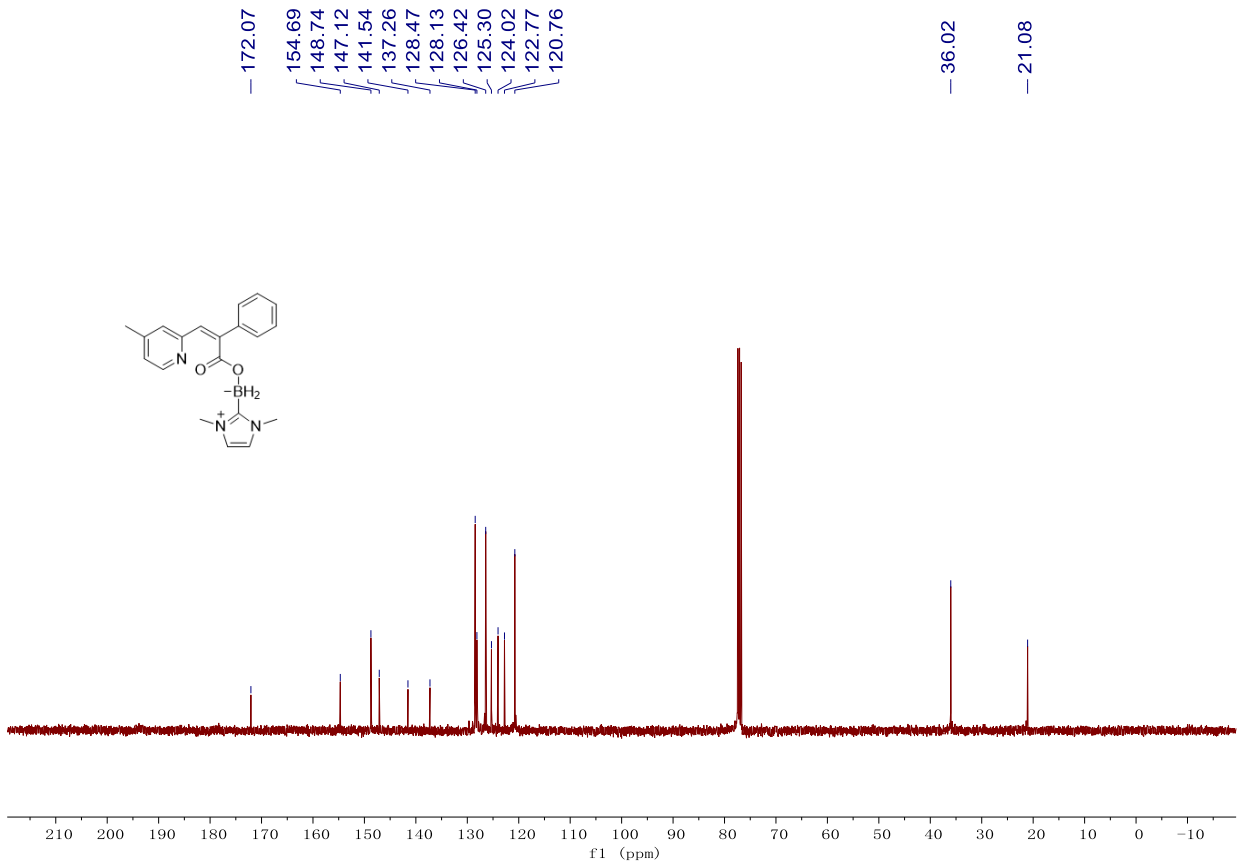

<sup>11</sup>B NMR spectrum of compound **3c**

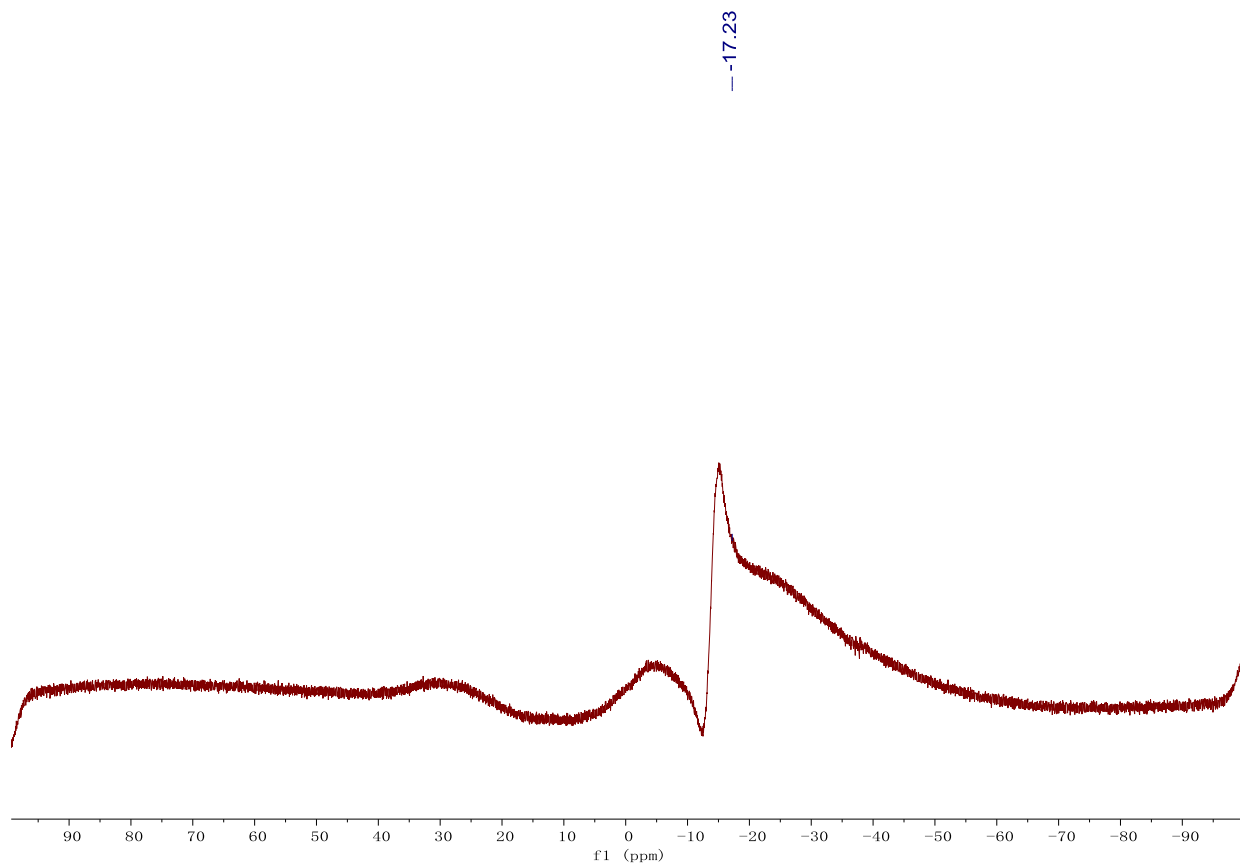

<sup>1</sup>H NMR and <sup>13</sup>C NMR spectrum of compound 3d

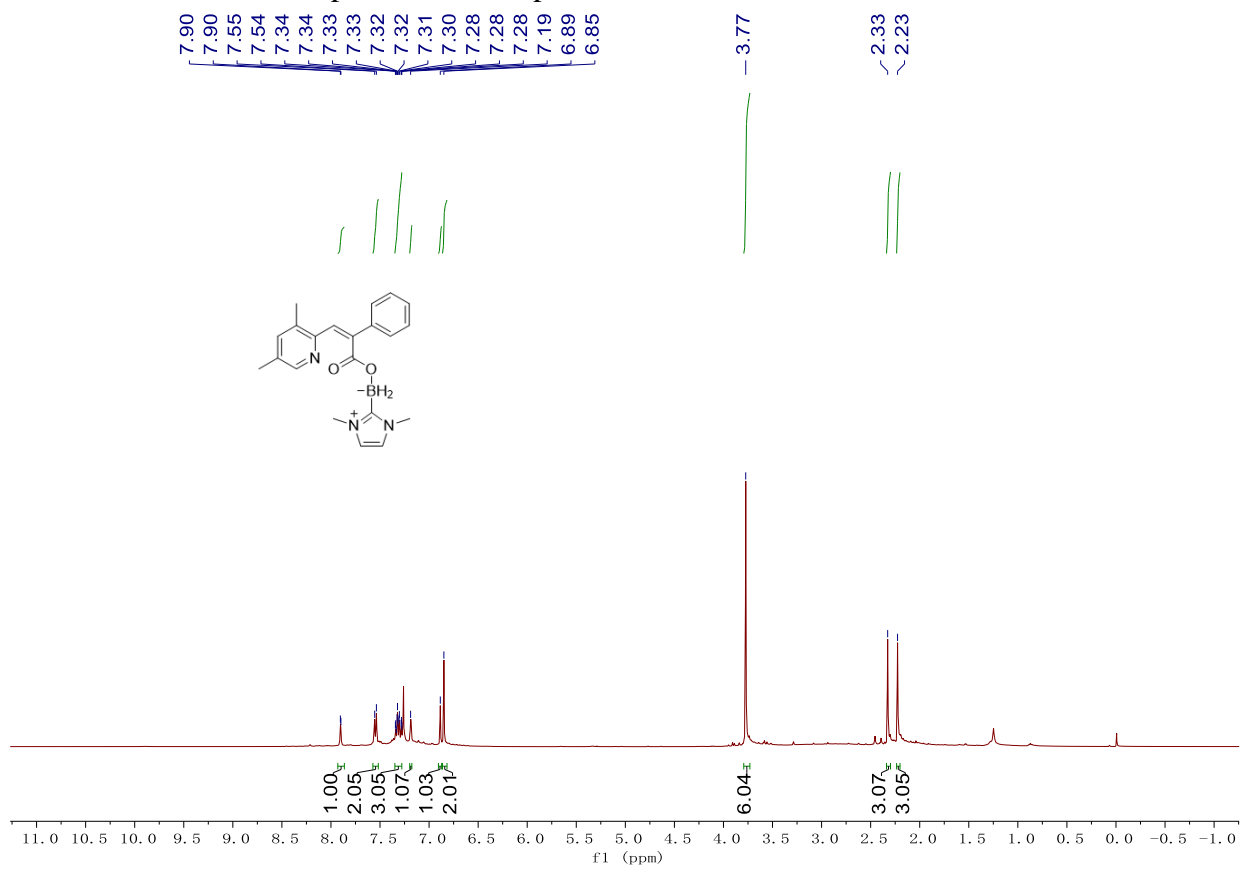

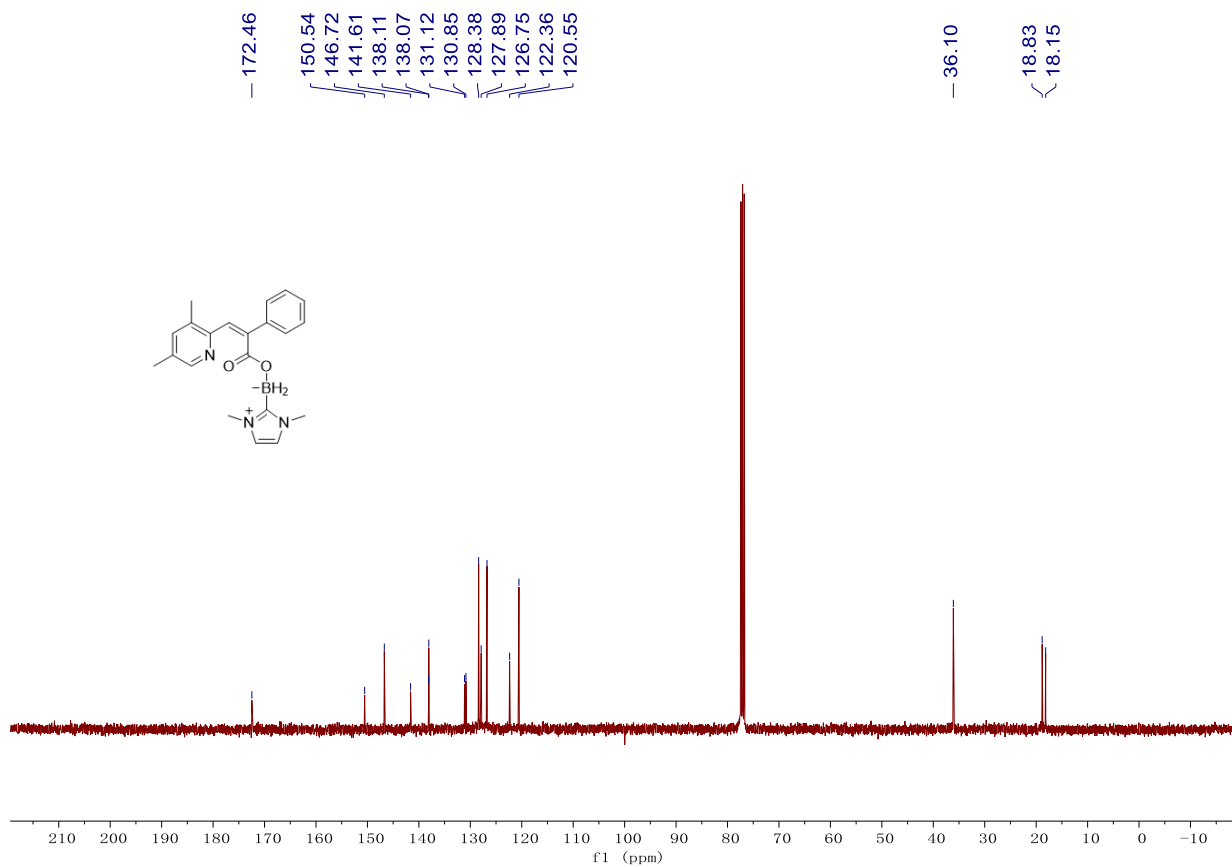

<sup>11</sup>B NMR spectrum of compound **3d**

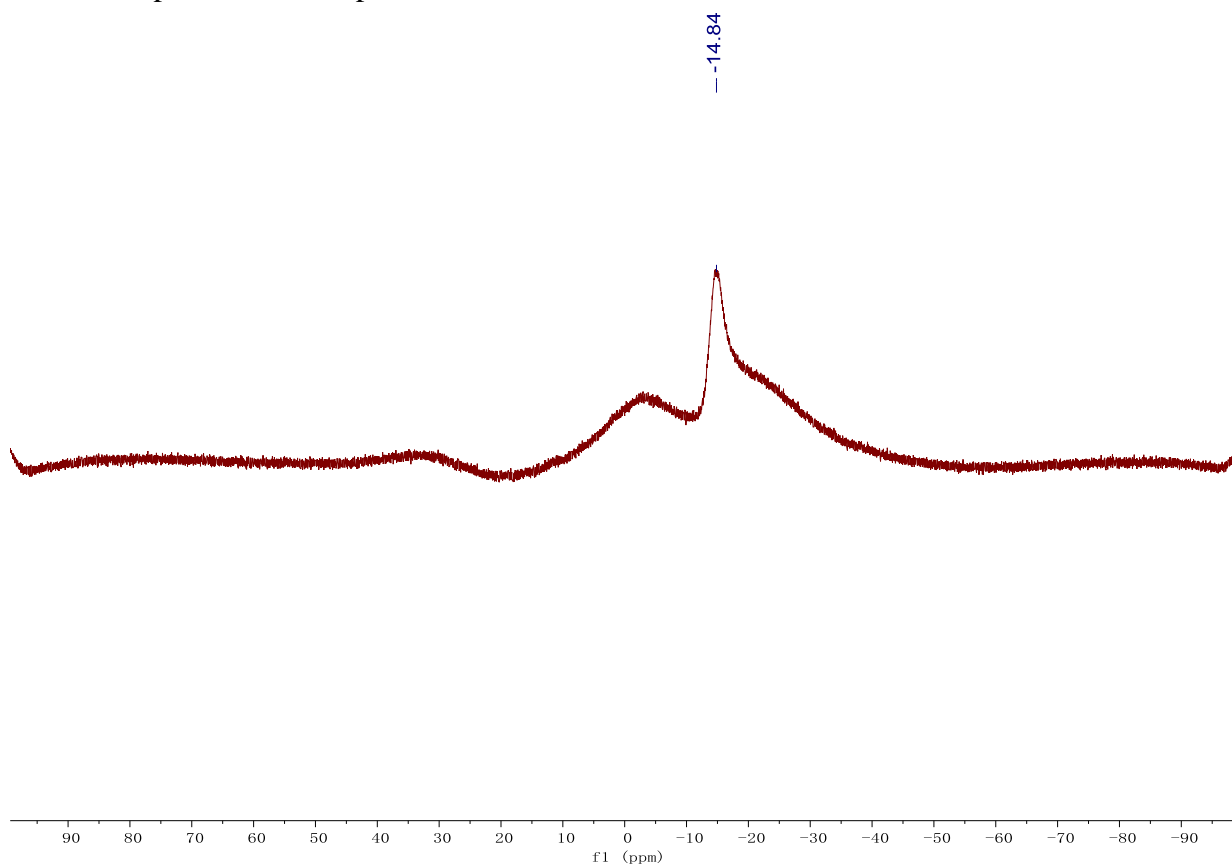

<sup>1</sup>H NMR and <sup>13</sup>C NMR spectrum of compound **3e**

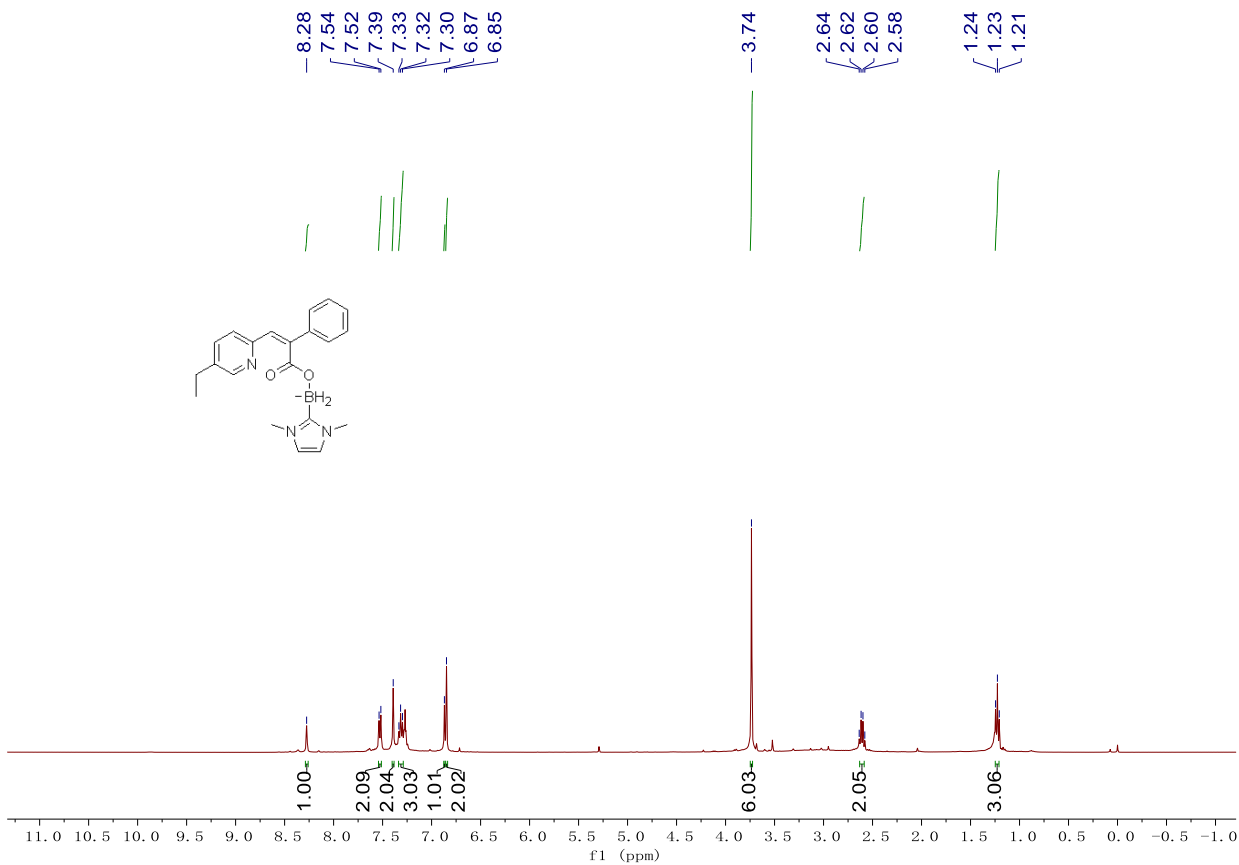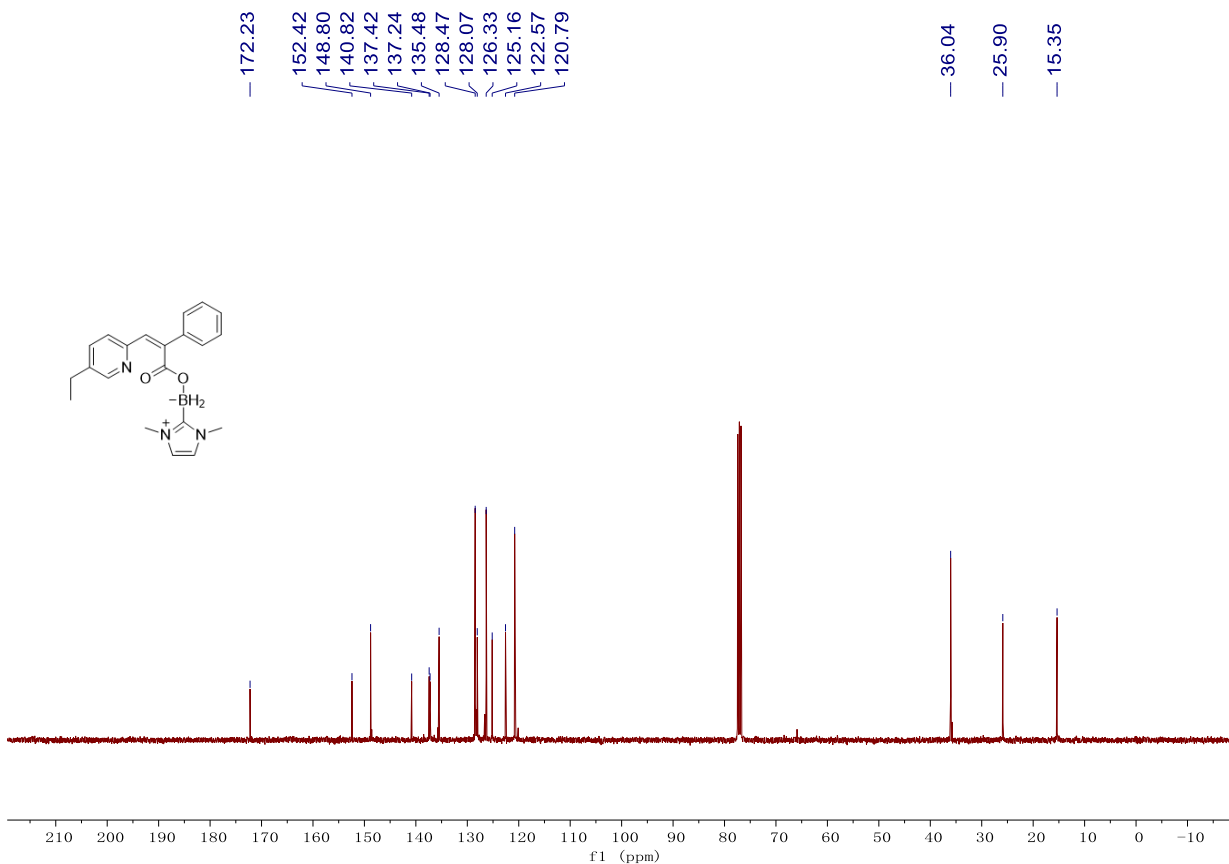

<sup>11</sup>B NMR spectrum of compound **3e**

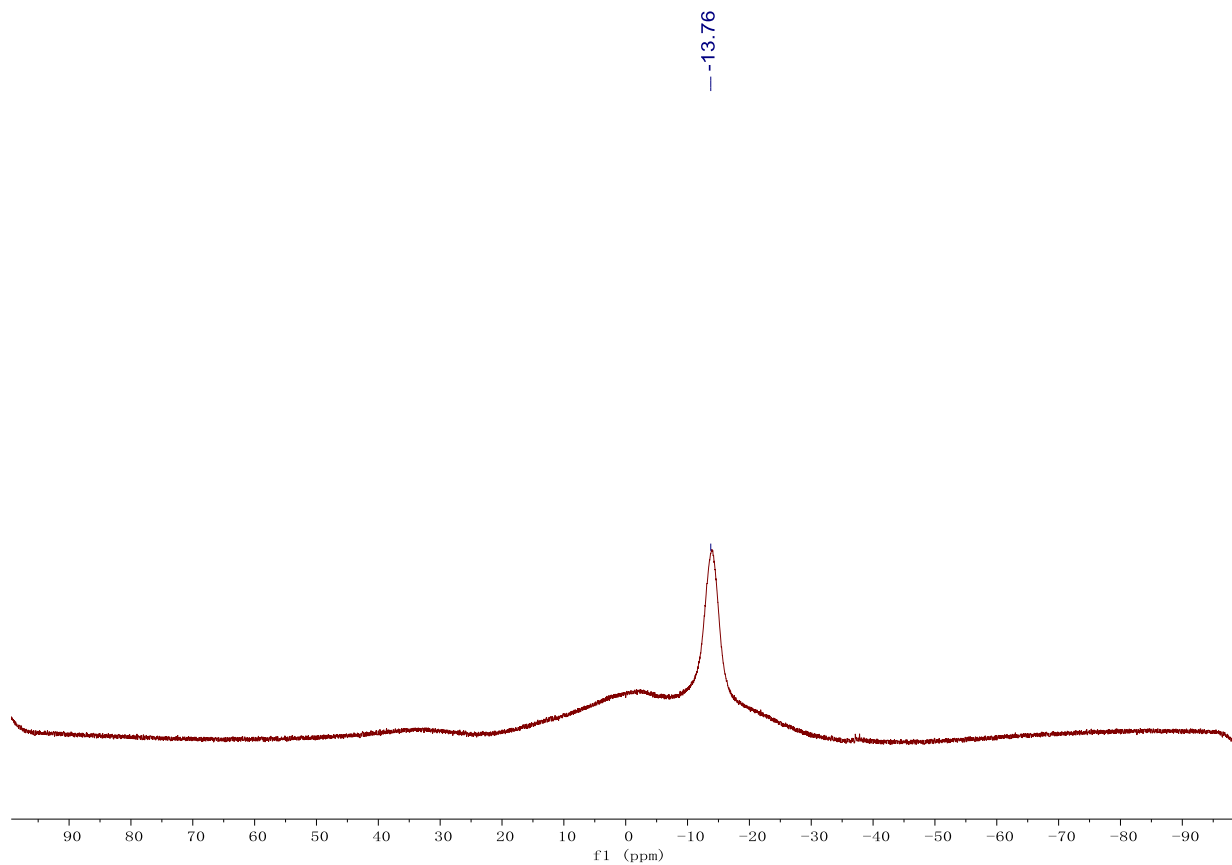

<sup>1</sup>H NMR and <sup>13</sup>C NMR spectrum of compound 3f

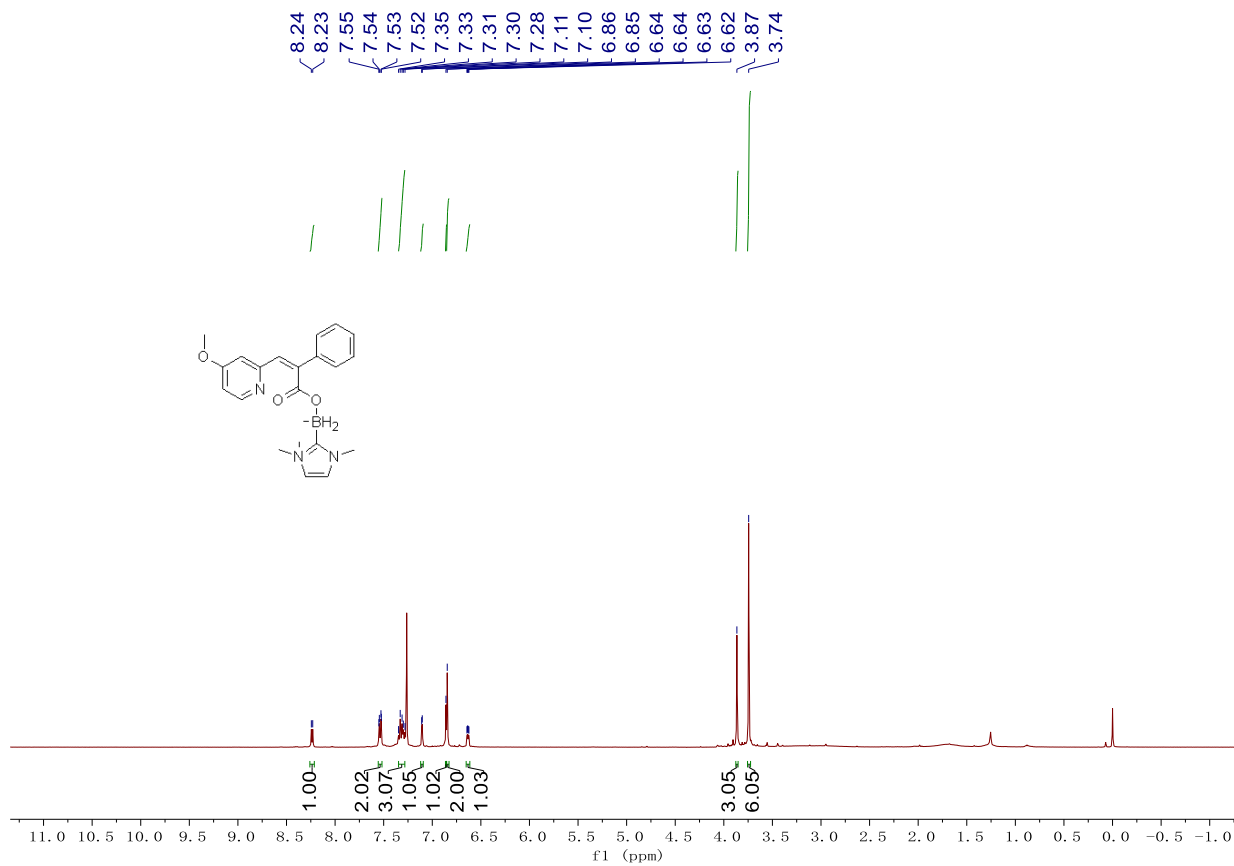

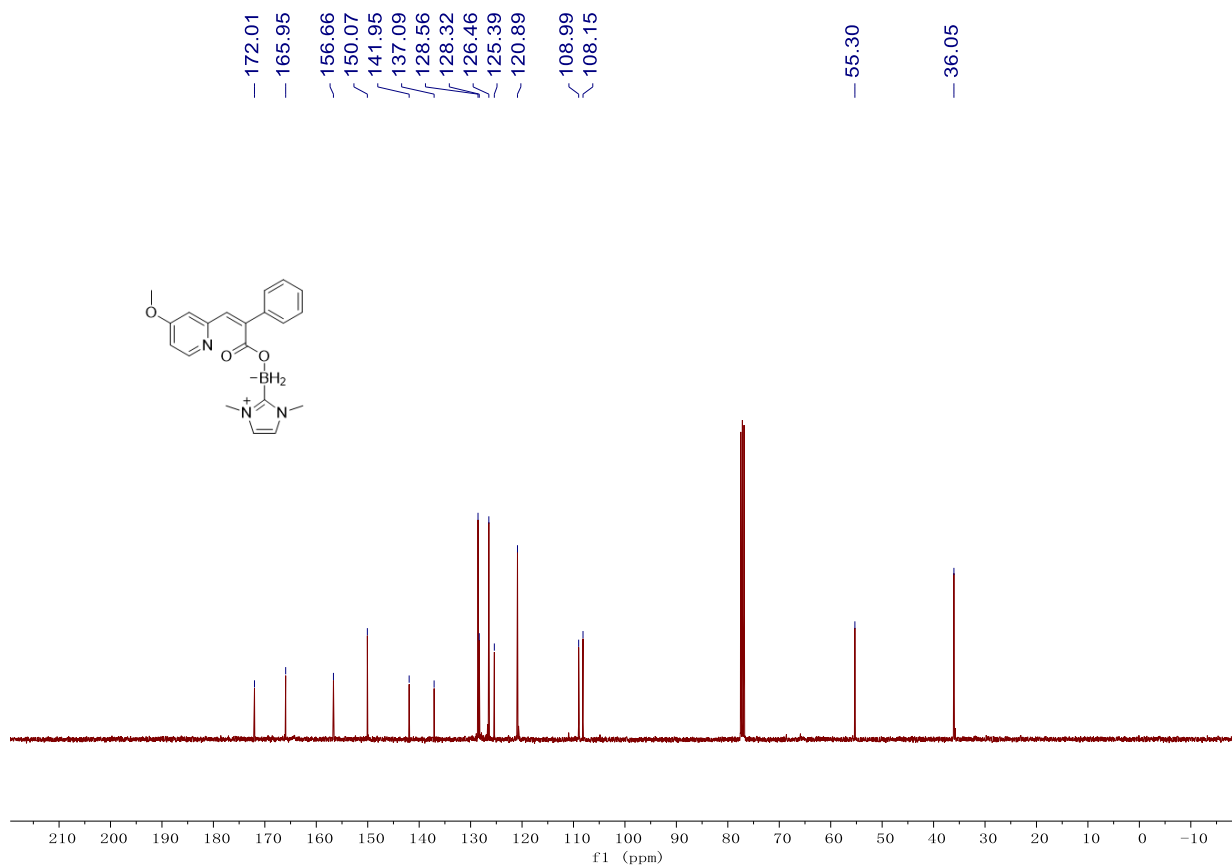

$^{11}\text{B}$  NMR spectrum of compound **3f**

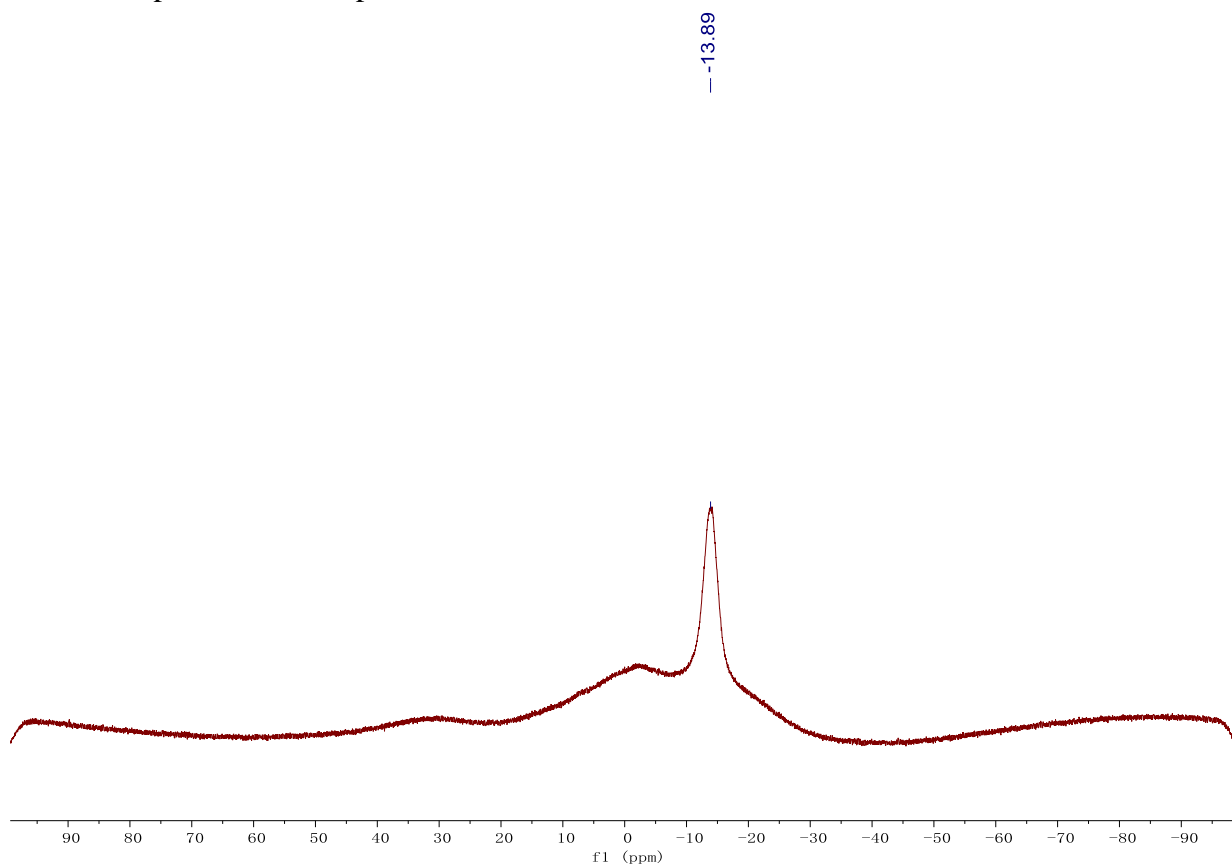

$^1\text{H}$  NMR and  $^{13}\text{C}$  NMR spectrum of compound **3g**



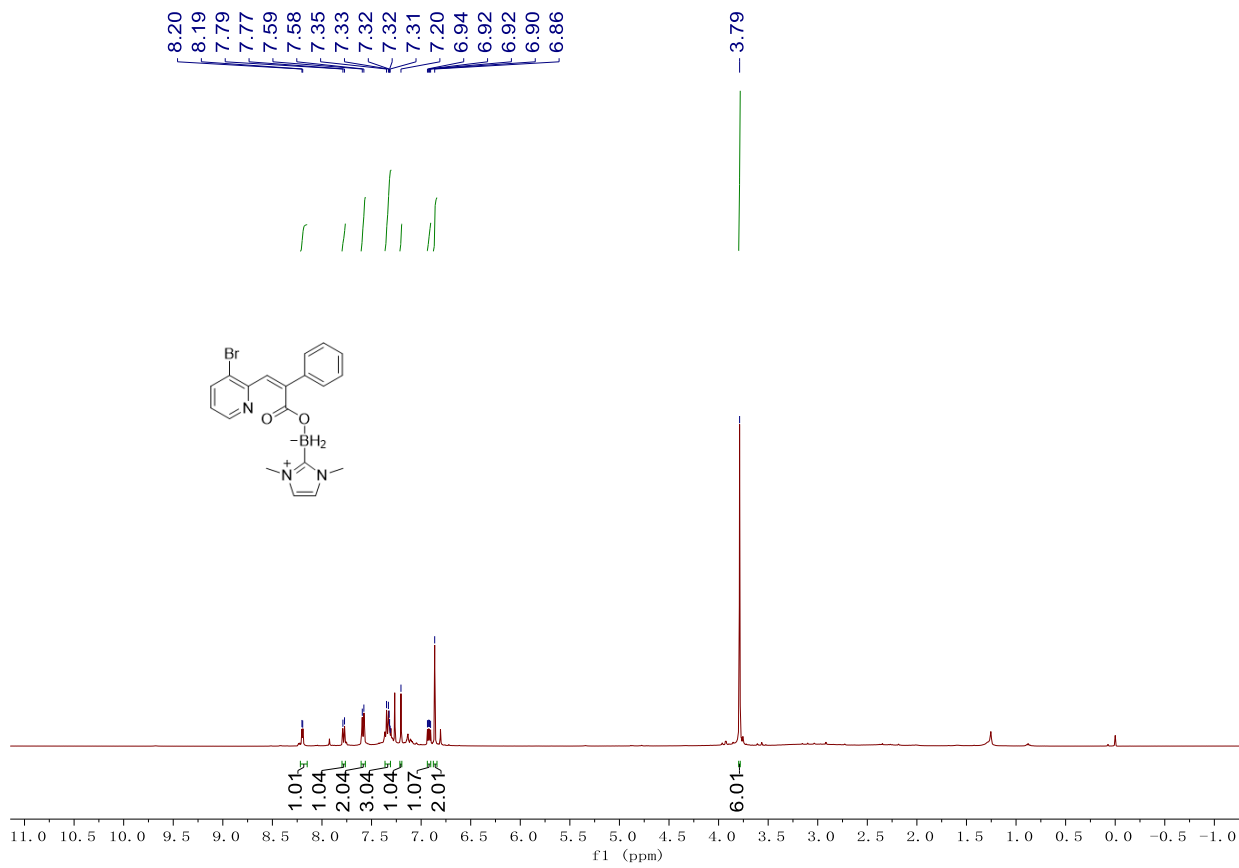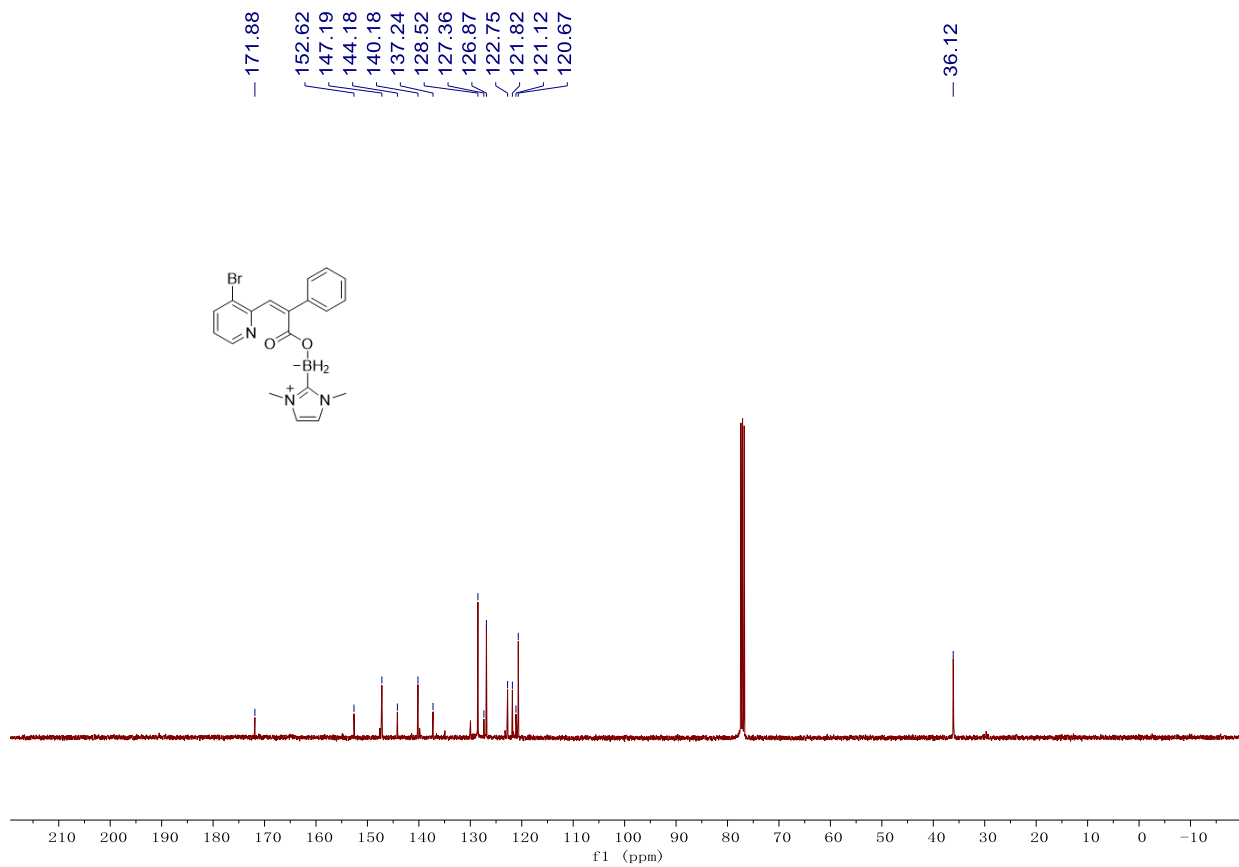

<sup>11</sup>B NMR spectrum of compound 3g

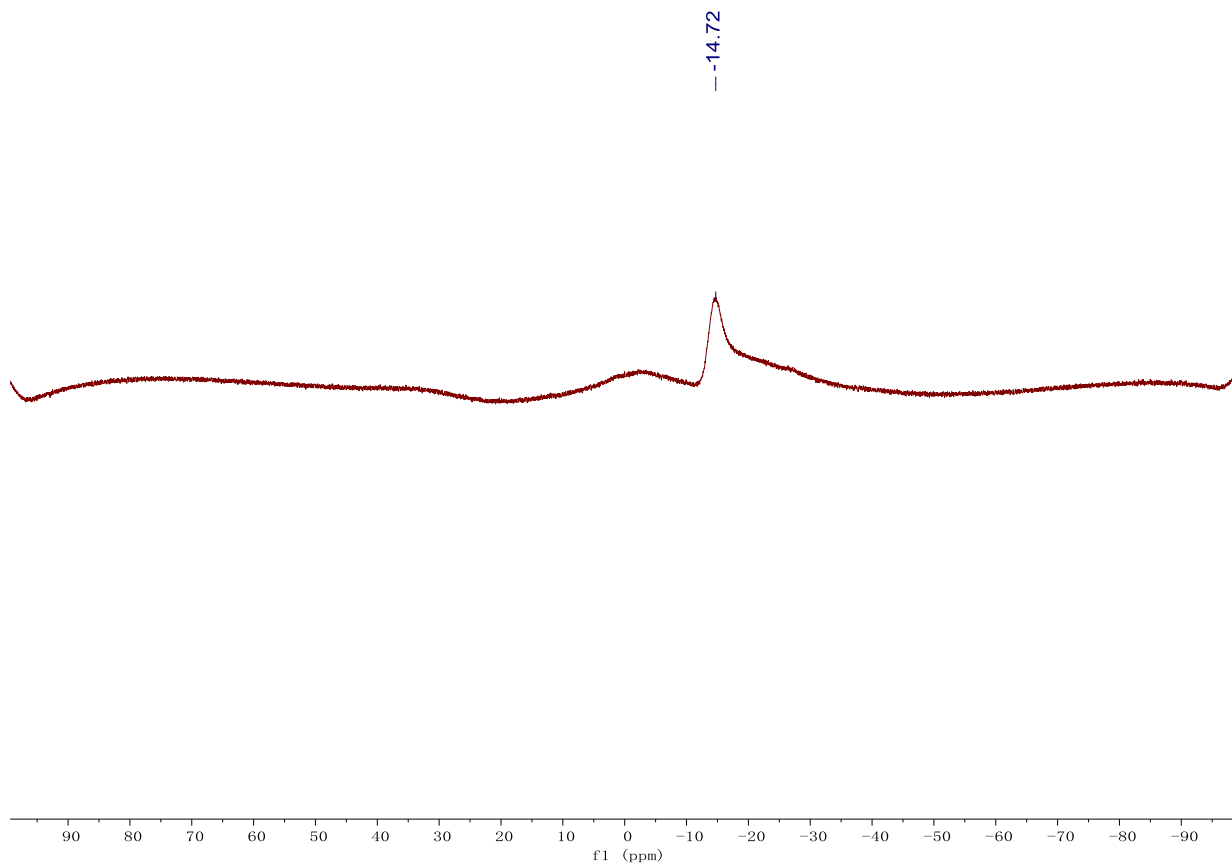

<sup>1</sup>H NMR and <sup>13</sup>C NMR spectrum of compound **3h**

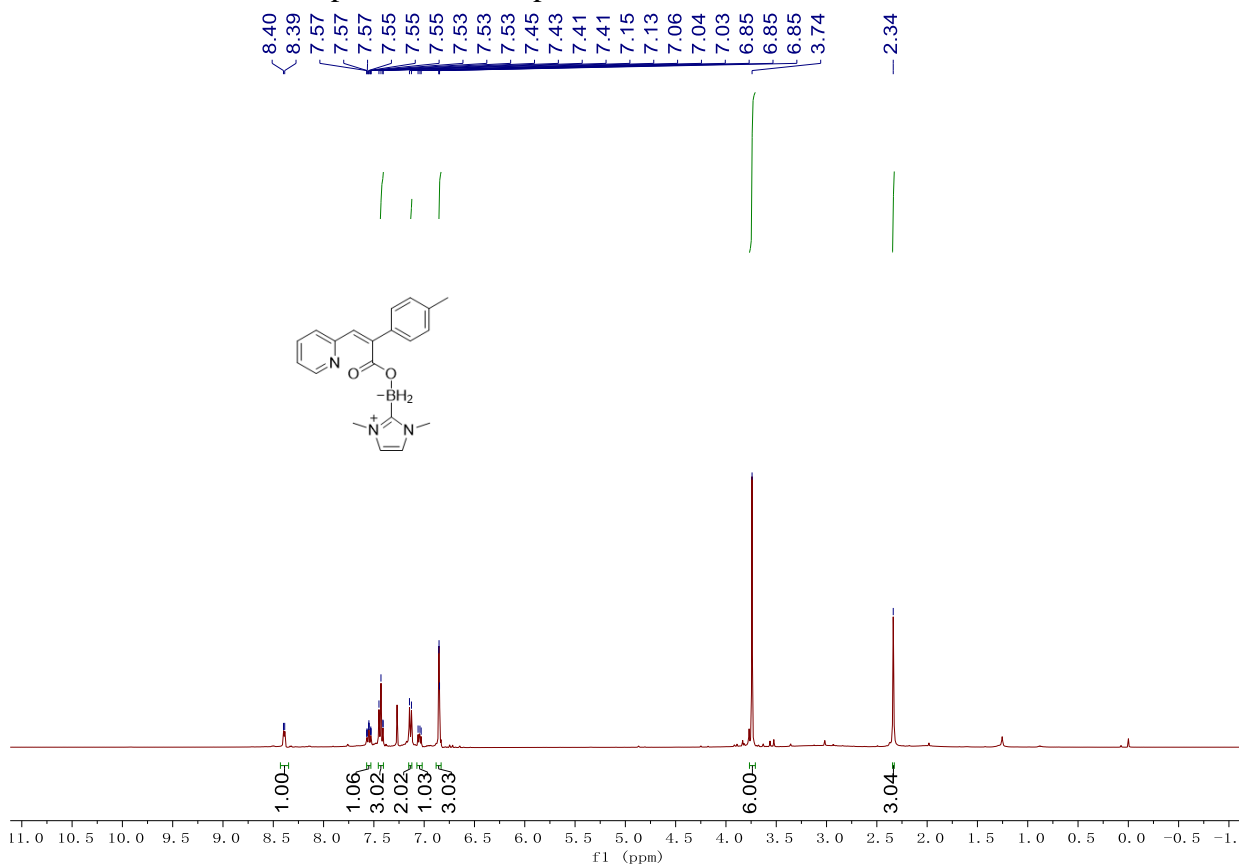

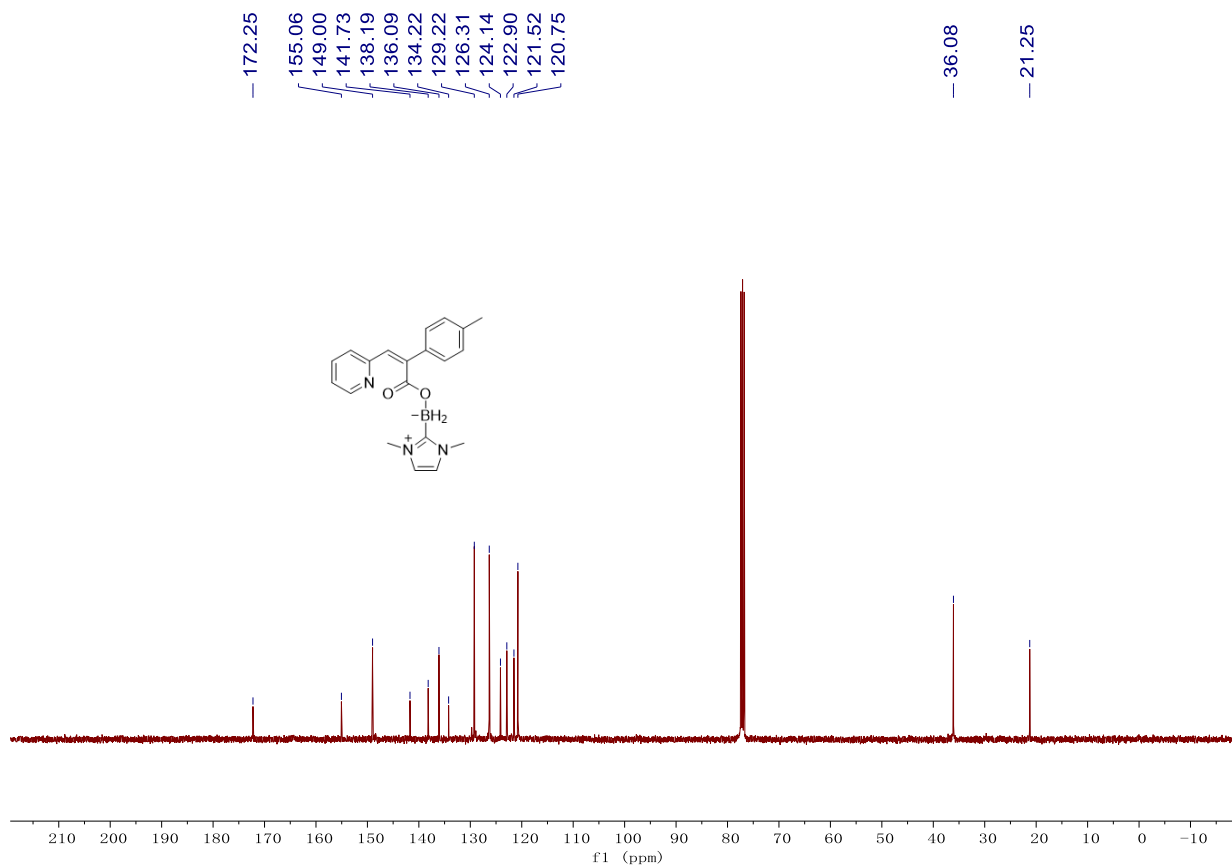

<sup>11</sup>B NMR spectrum of compound **3h**

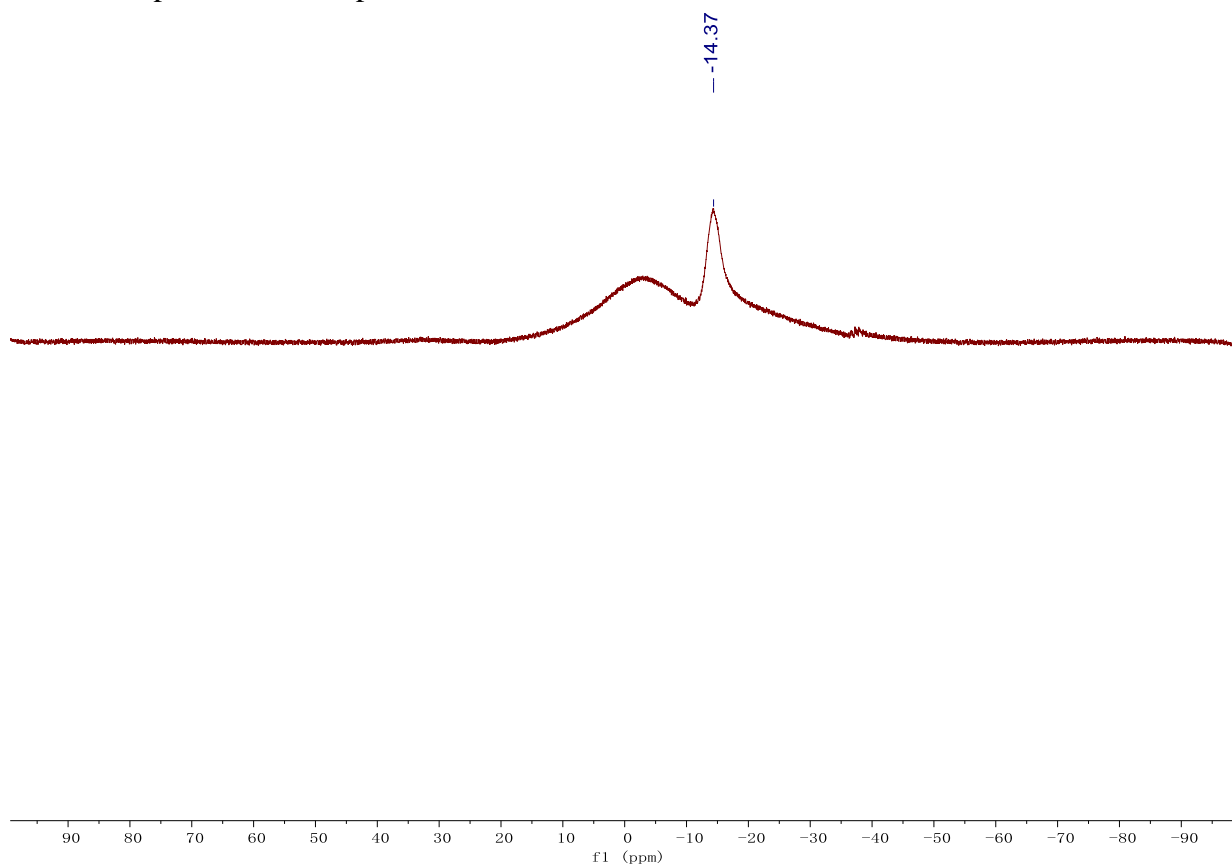

<sup>1</sup>H NMR and <sup>13</sup>C NMR spectrum of compound **3i**

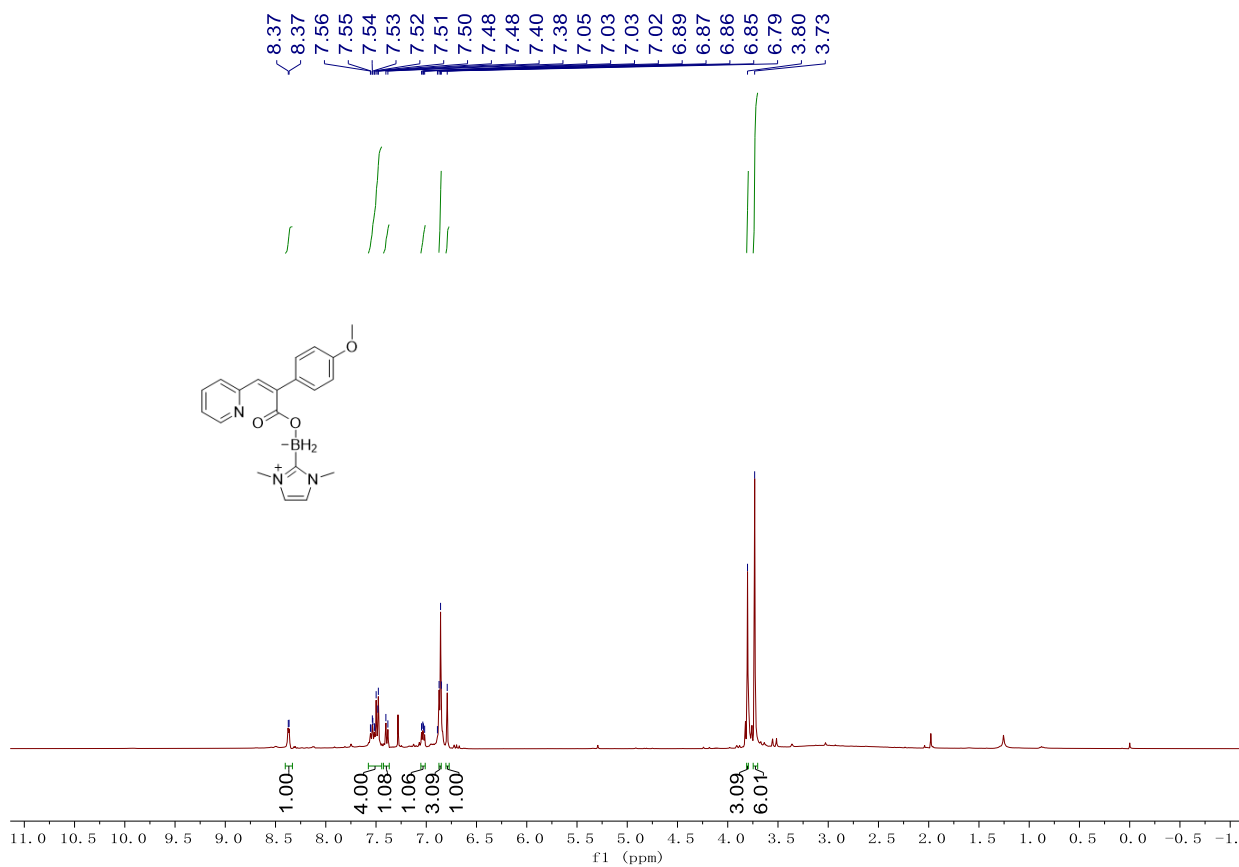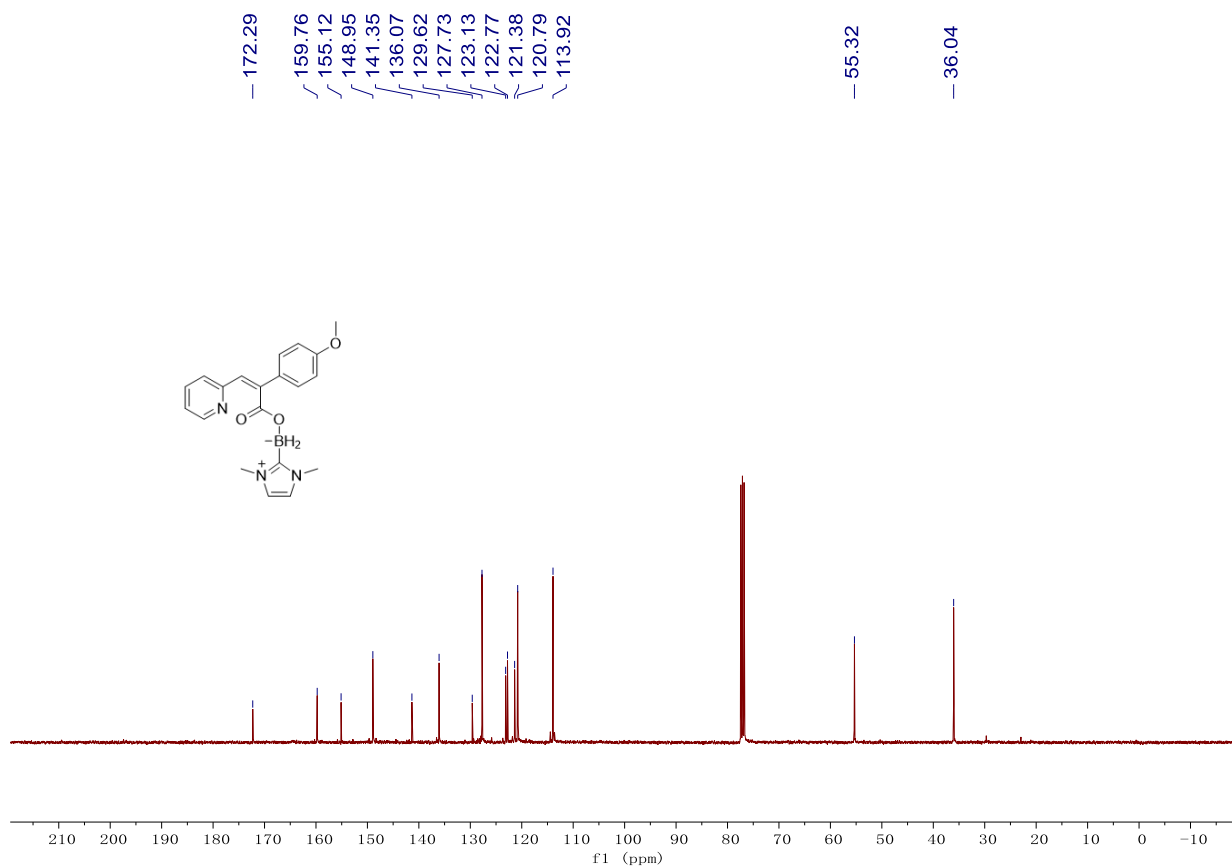

<sup>11</sup>B NMR spectrum of compound **3i**

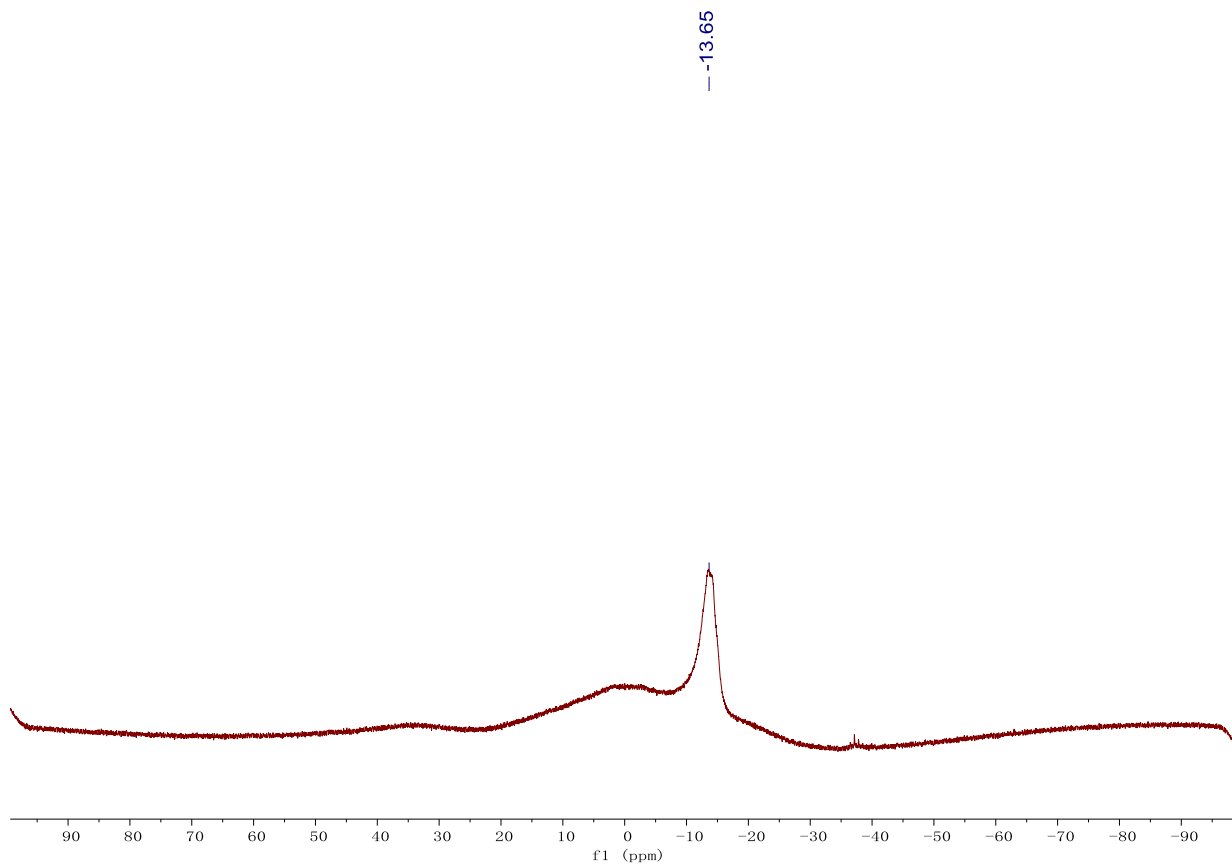

<sup>1</sup>H NMR and <sup>13</sup>C NMR spectrum of compound **3j**

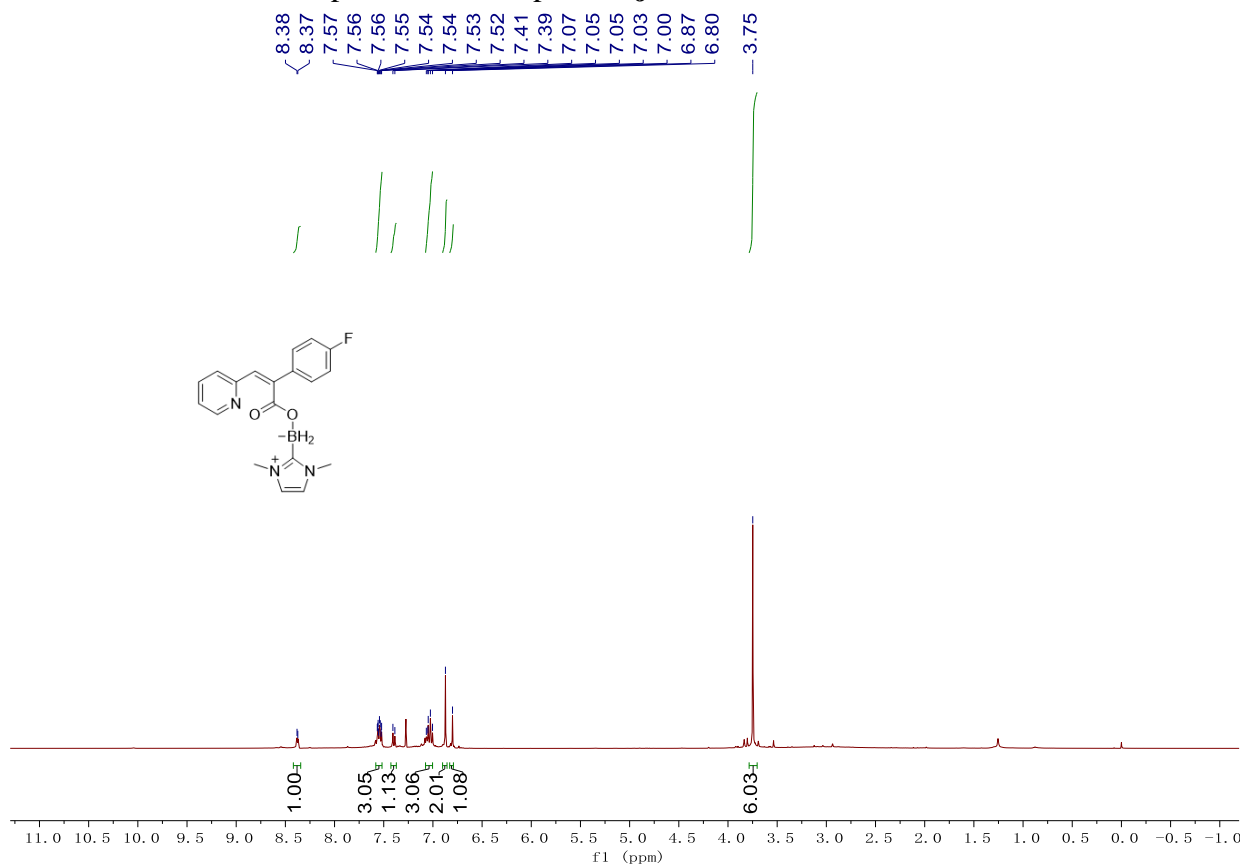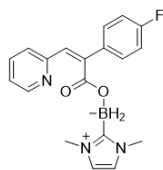

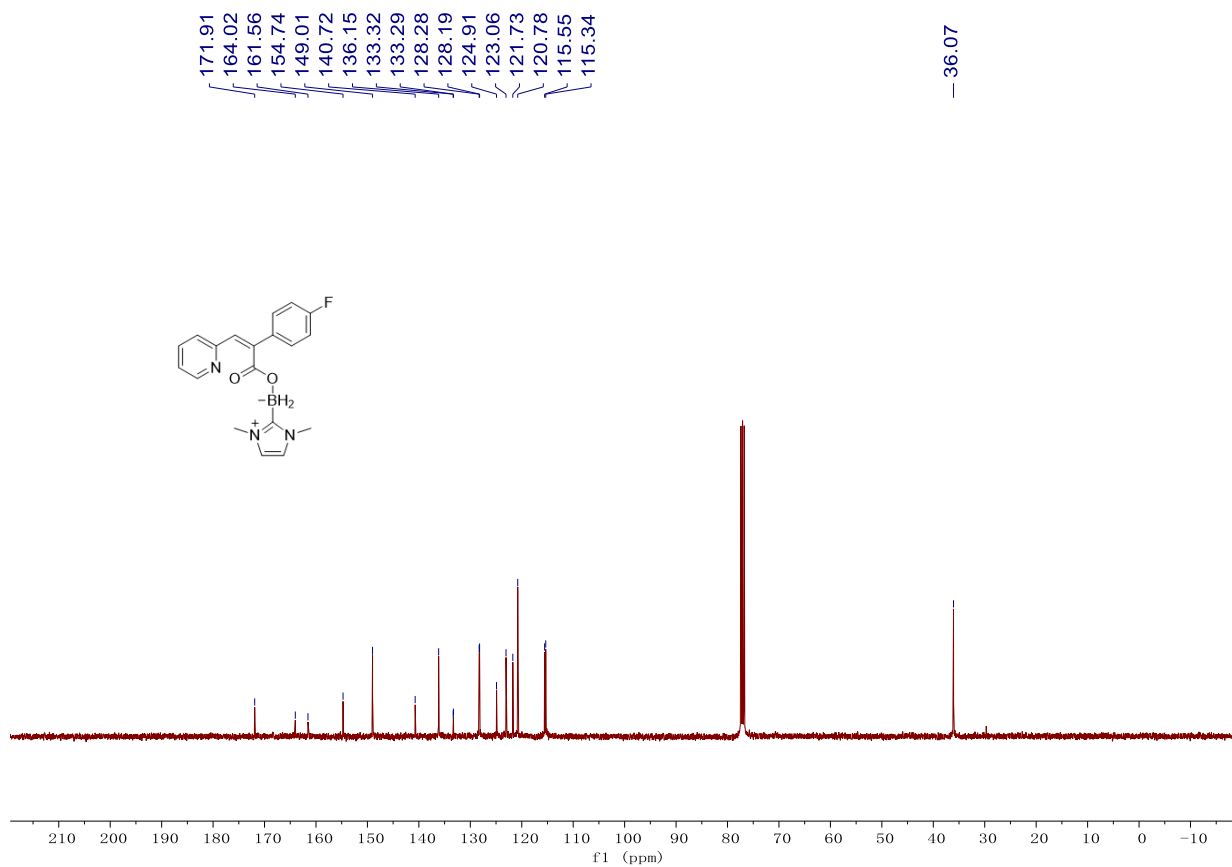

$^{11}\text{B}$  NMR spectrum of compound **3j**

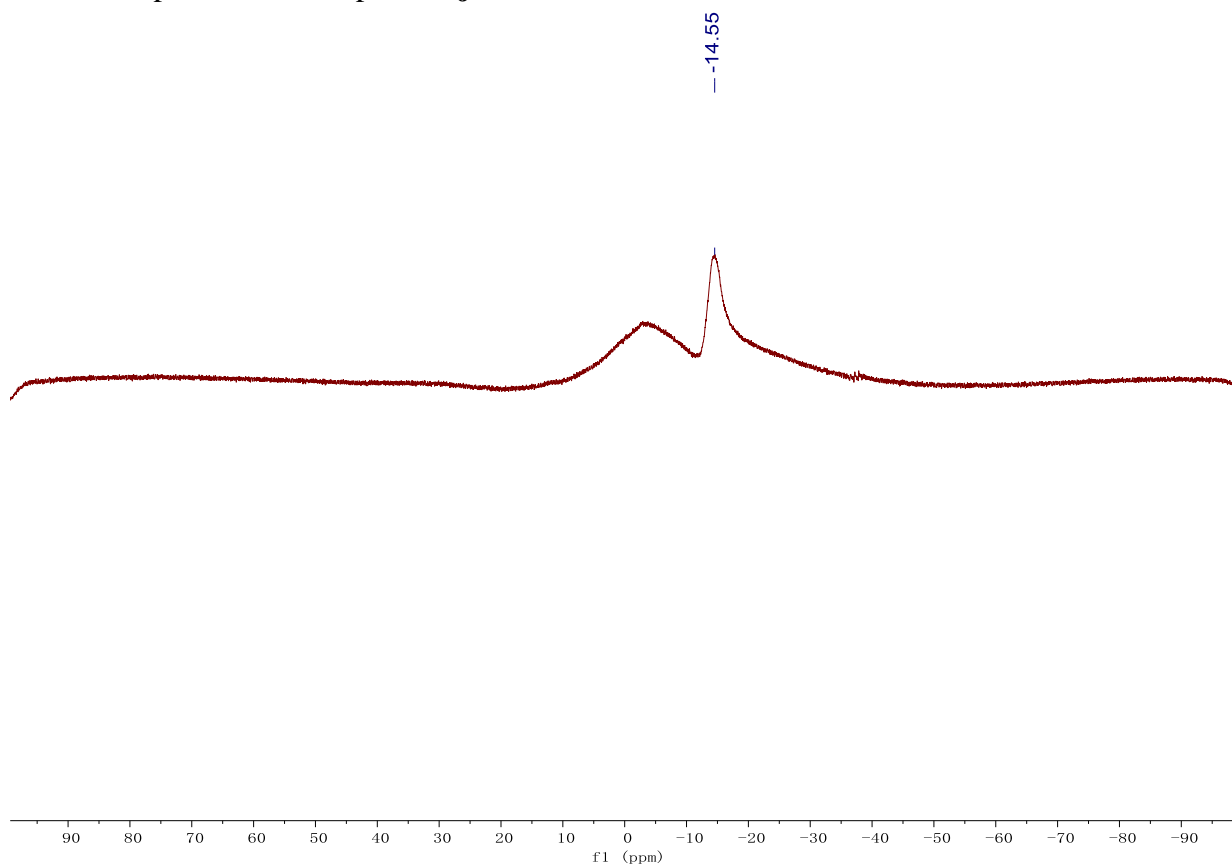

$^1\text{H}$  NMR and  $^{13}\text{C}$  NMR spectrum of compound **3k**

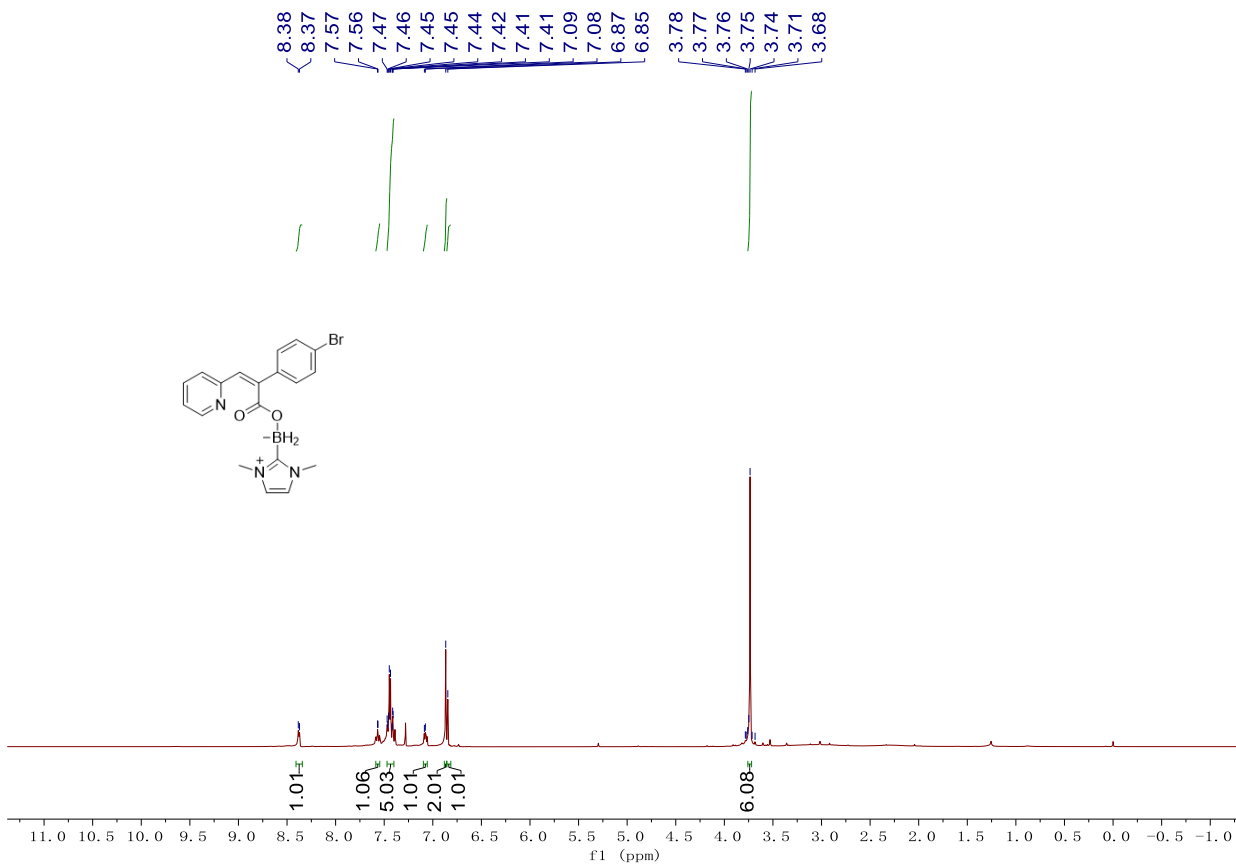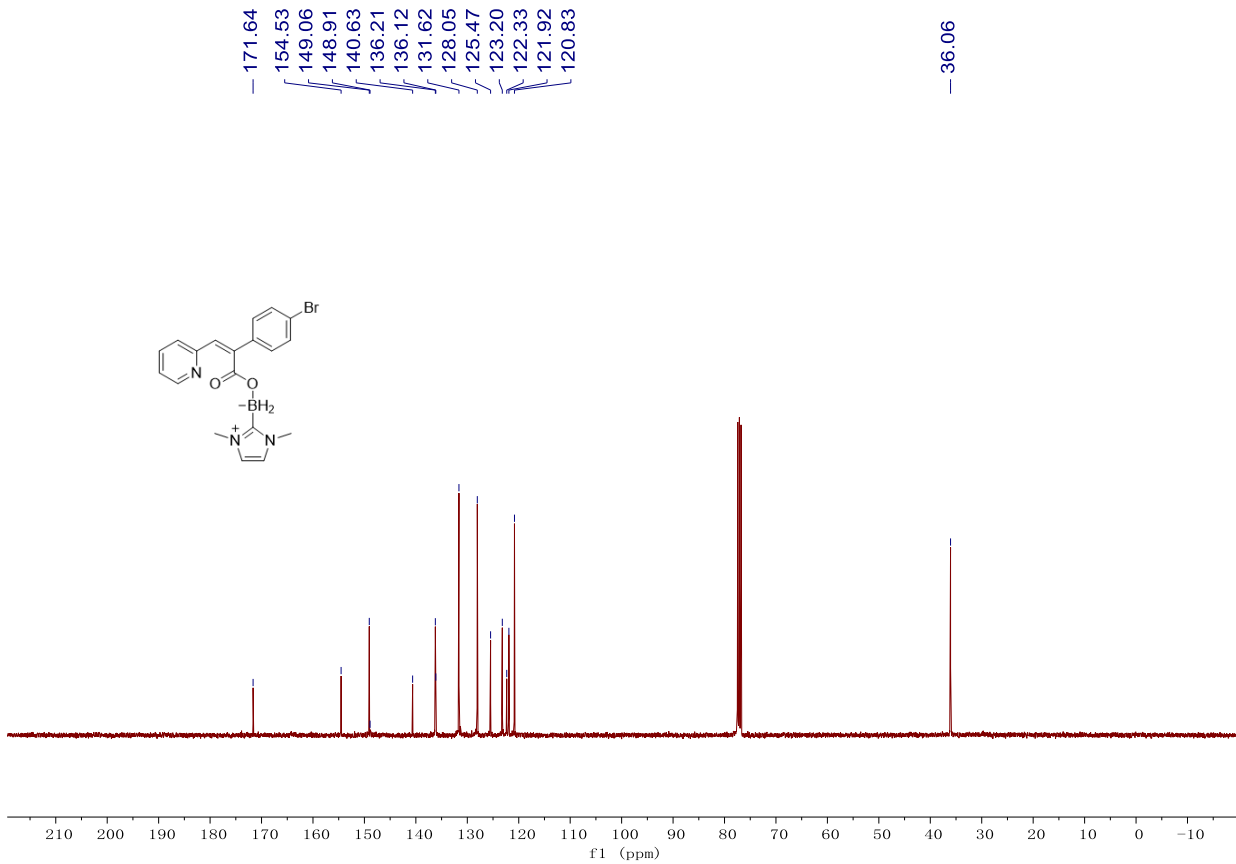

<sup>11</sup>B NMR spectrum of compound **3k**

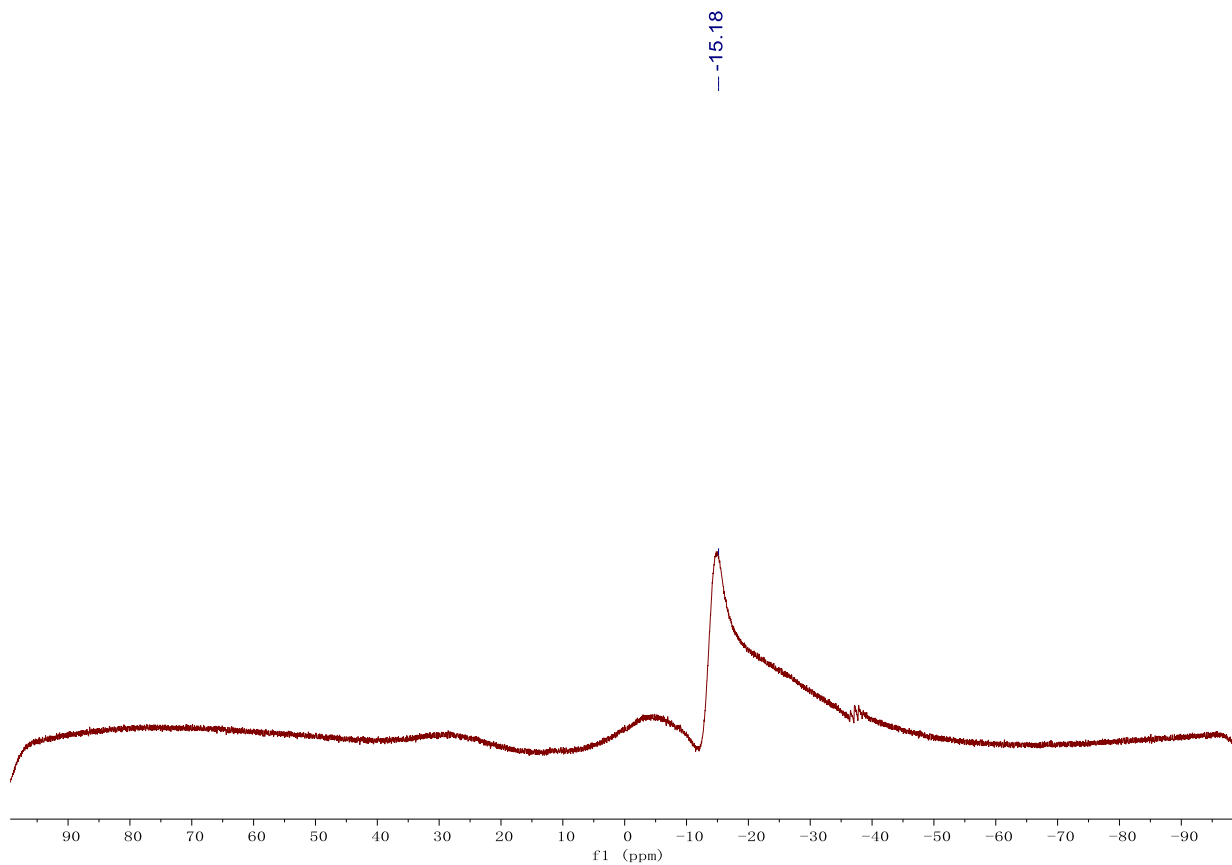

<sup>1</sup>H NMR and <sup>13</sup>C NMR spectrum of compound **31**

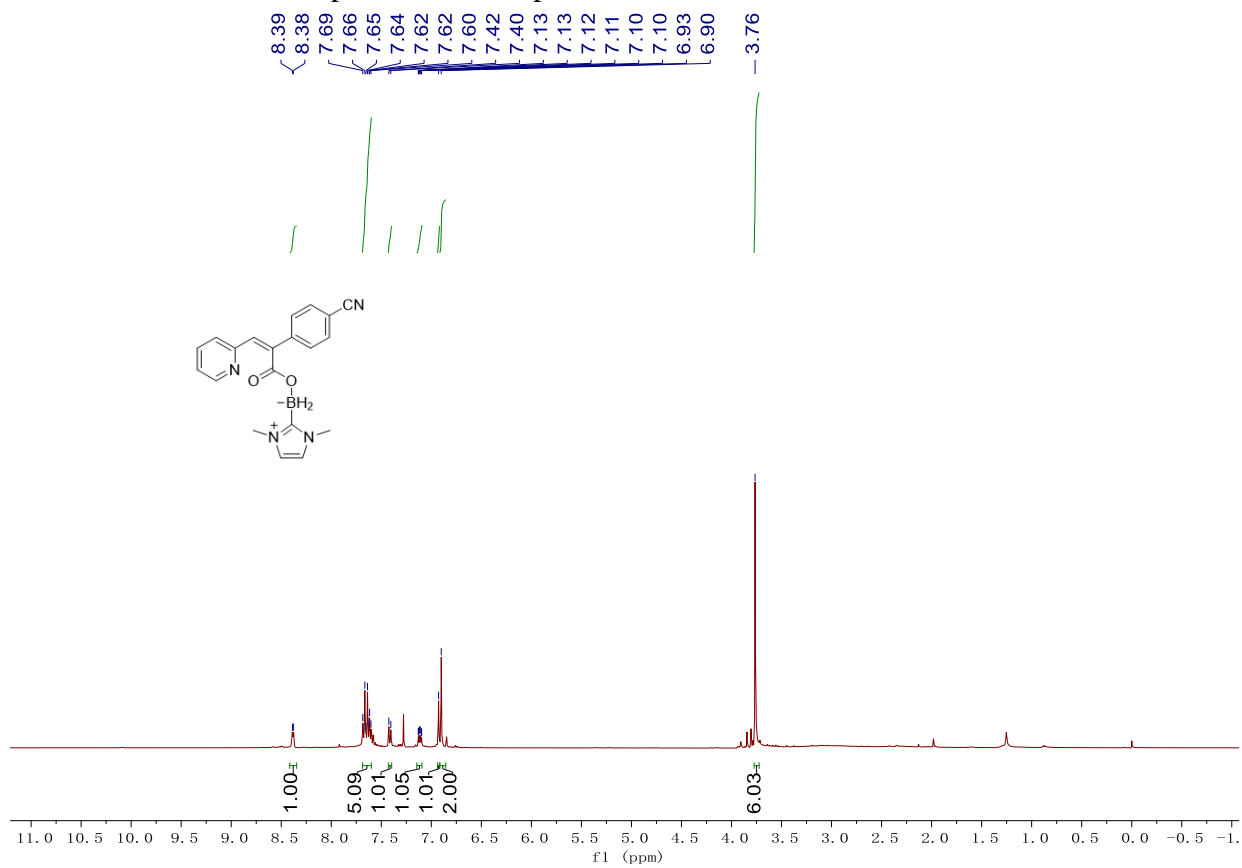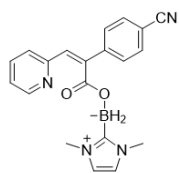



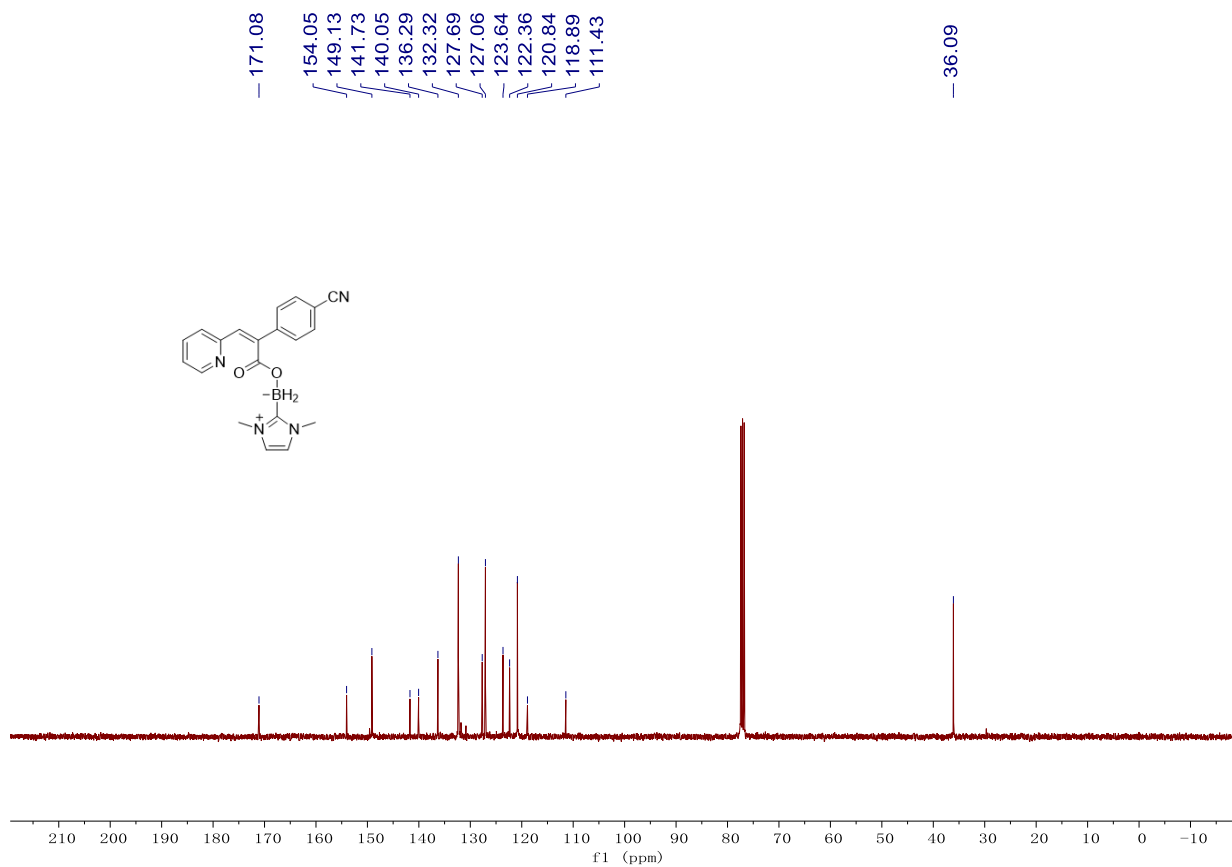

<sup>11</sup>B NMR spectrum of compound **3l**

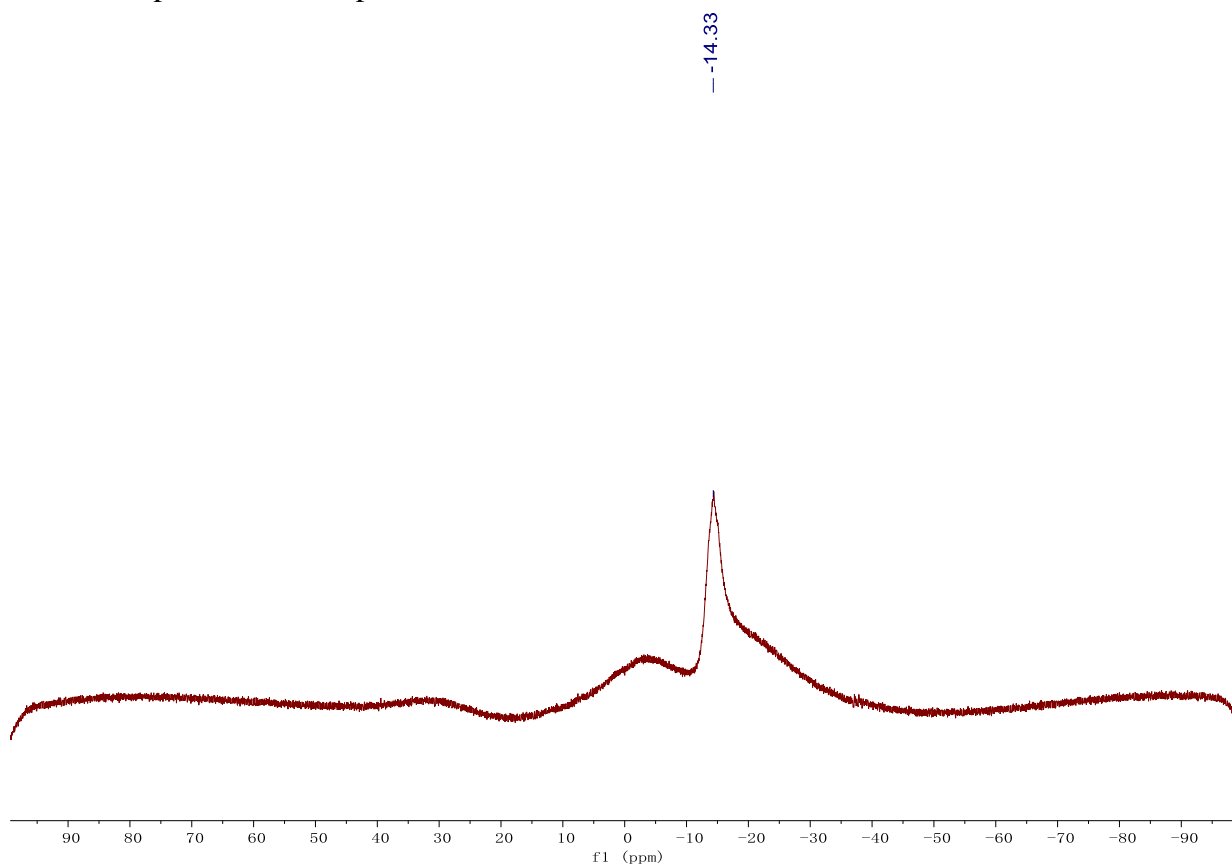

<sup>1</sup>H NMR and <sup>13</sup>C NMR spectrum of compound **3m**

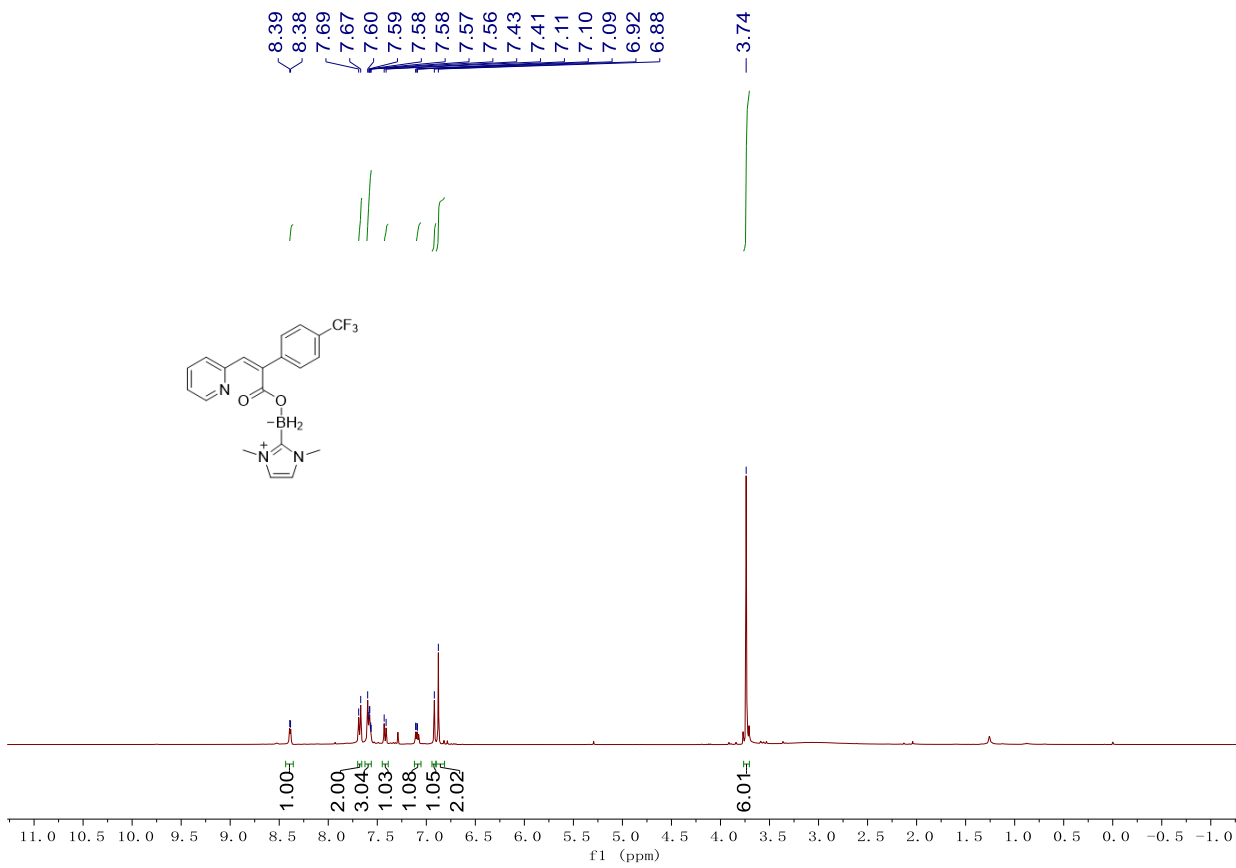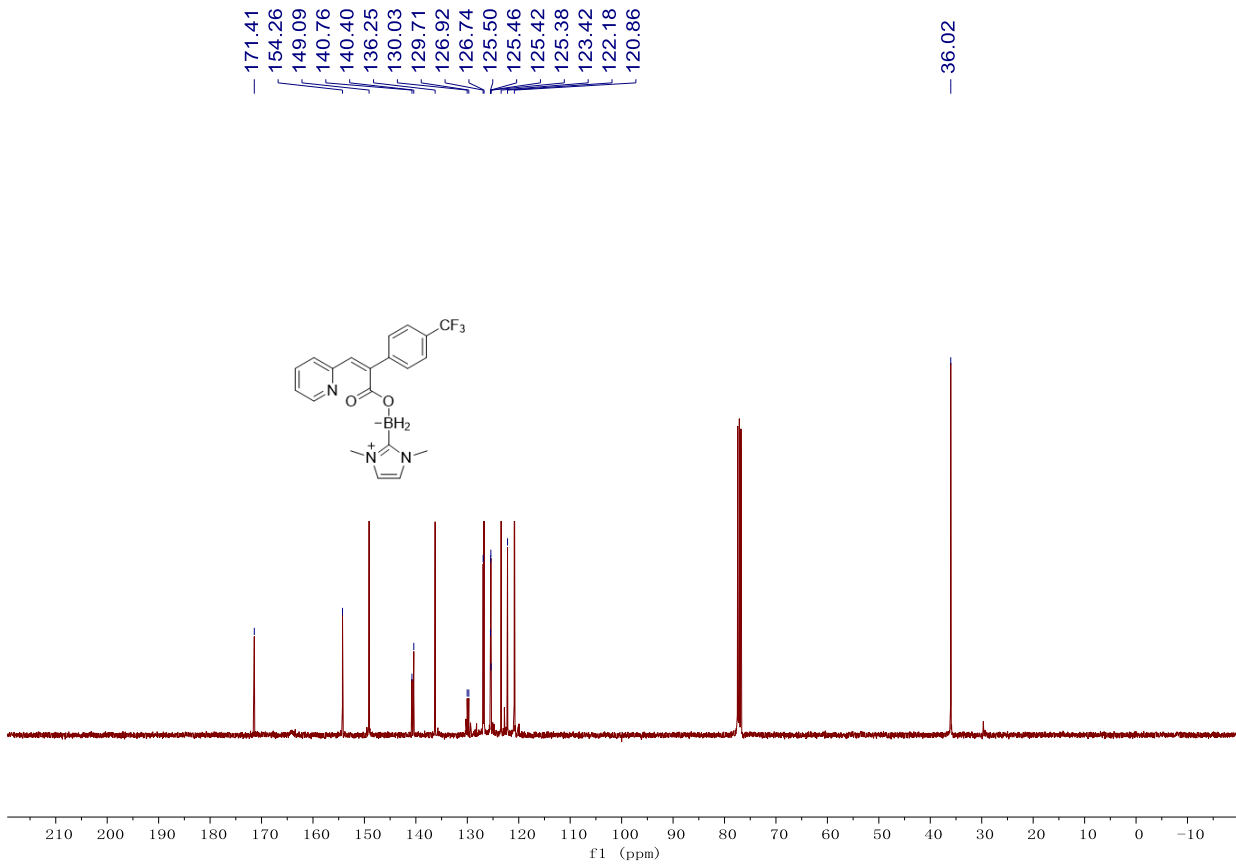

<sup>11</sup>B NMR spectrum of compound 3m

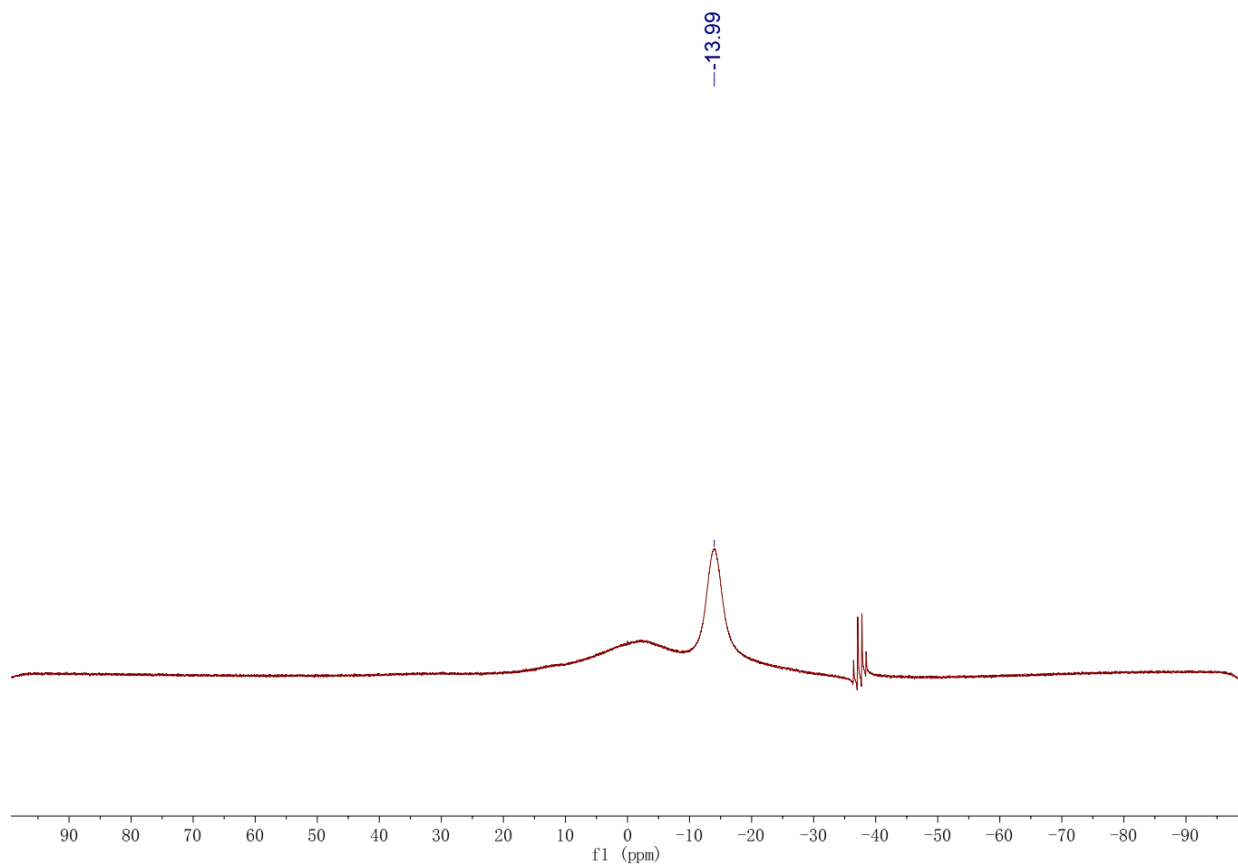

<sup>1</sup>H NMR and <sup>13</sup>C NMR spectrum of compound **3n**

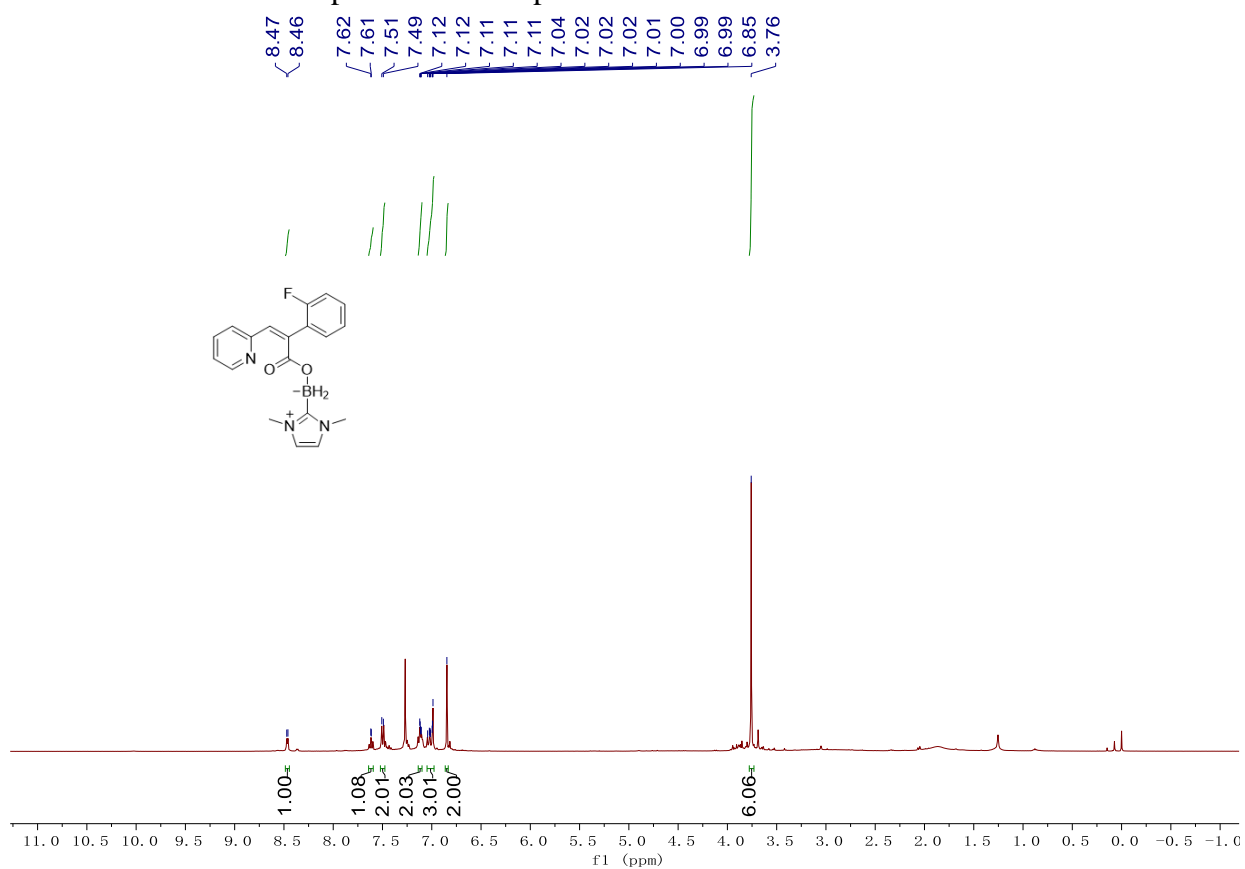

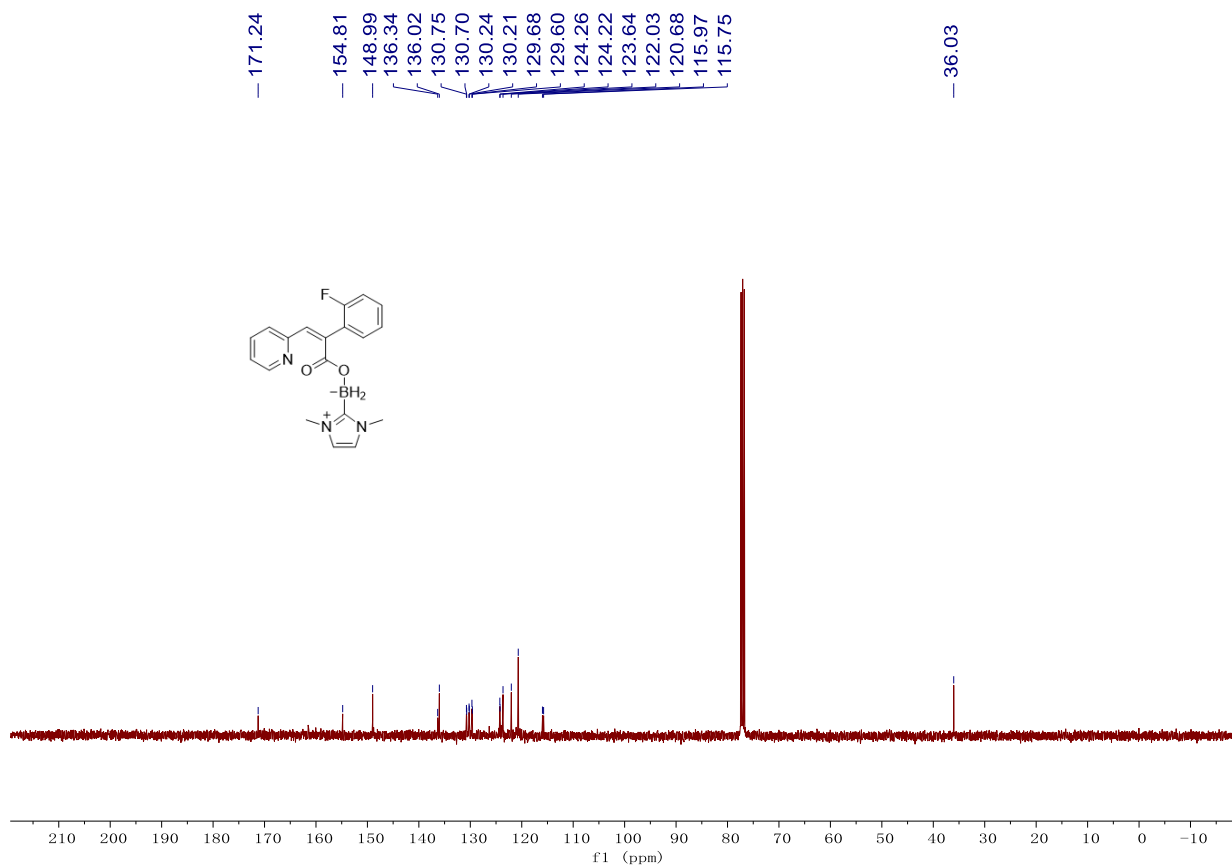

$^{11}\text{B}$  NMR spectrum of compound **3n**

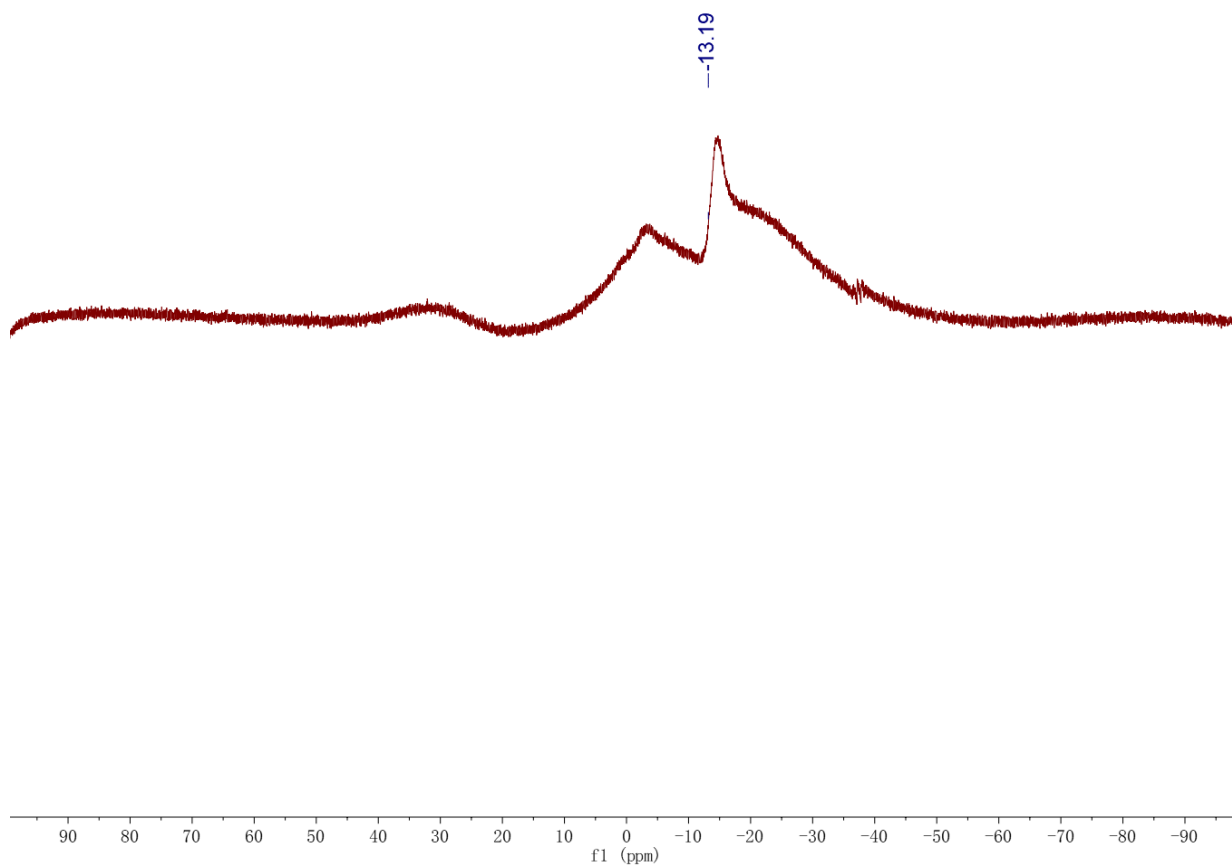

$^1\text{H}$  NMR and  $^{13}\text{C}$  NMR spectrum of compound **3o**

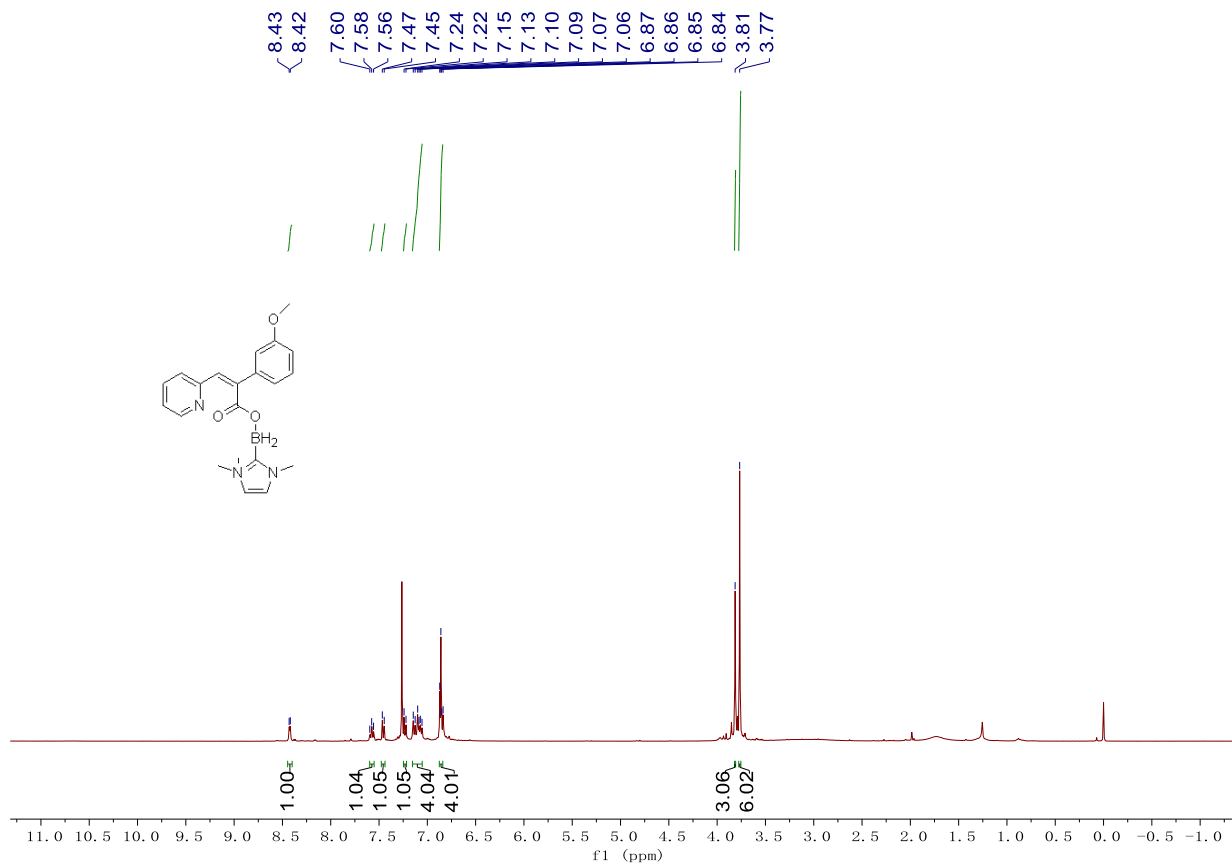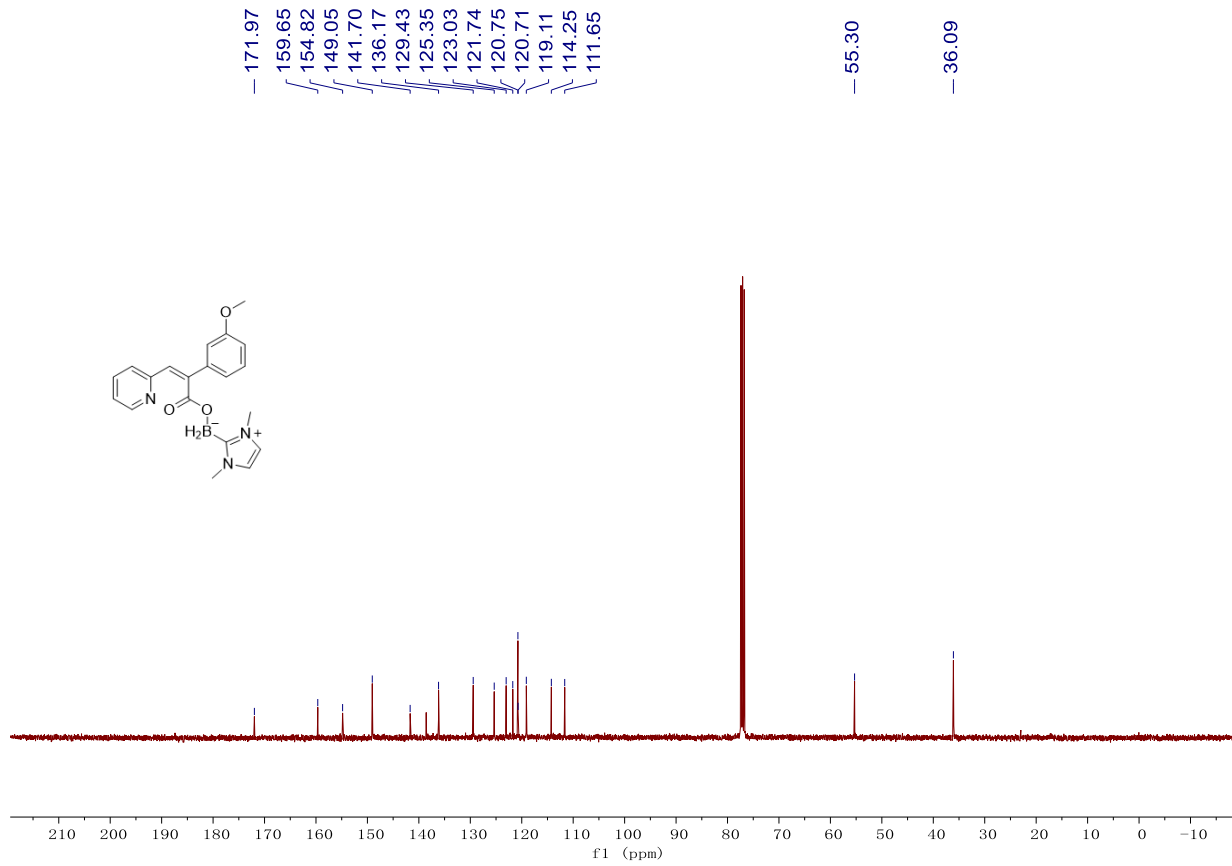

<sup>11</sup>B NMR spectrum of compound **3o**

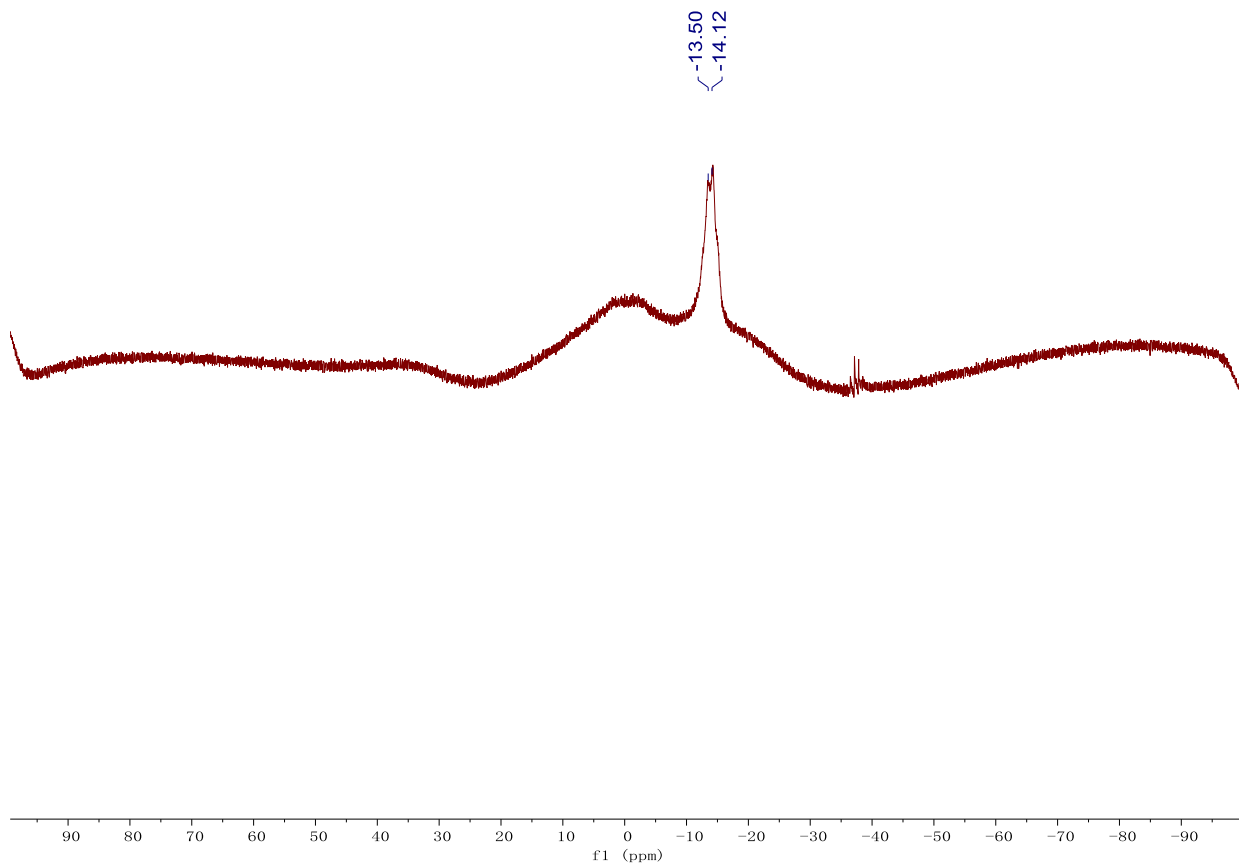

<sup>1</sup>H NMR and <sup>13</sup>C NMR spectrum of compound 3p

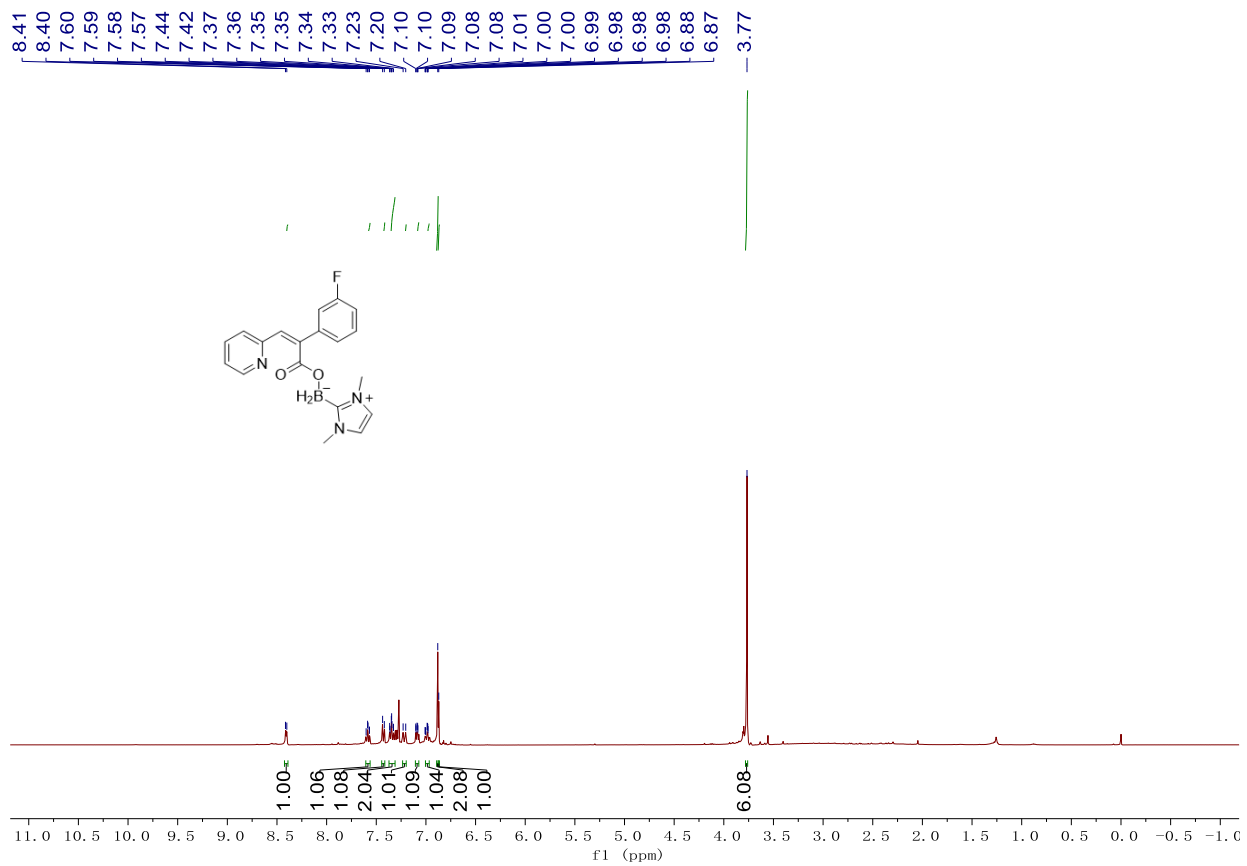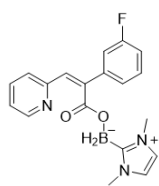

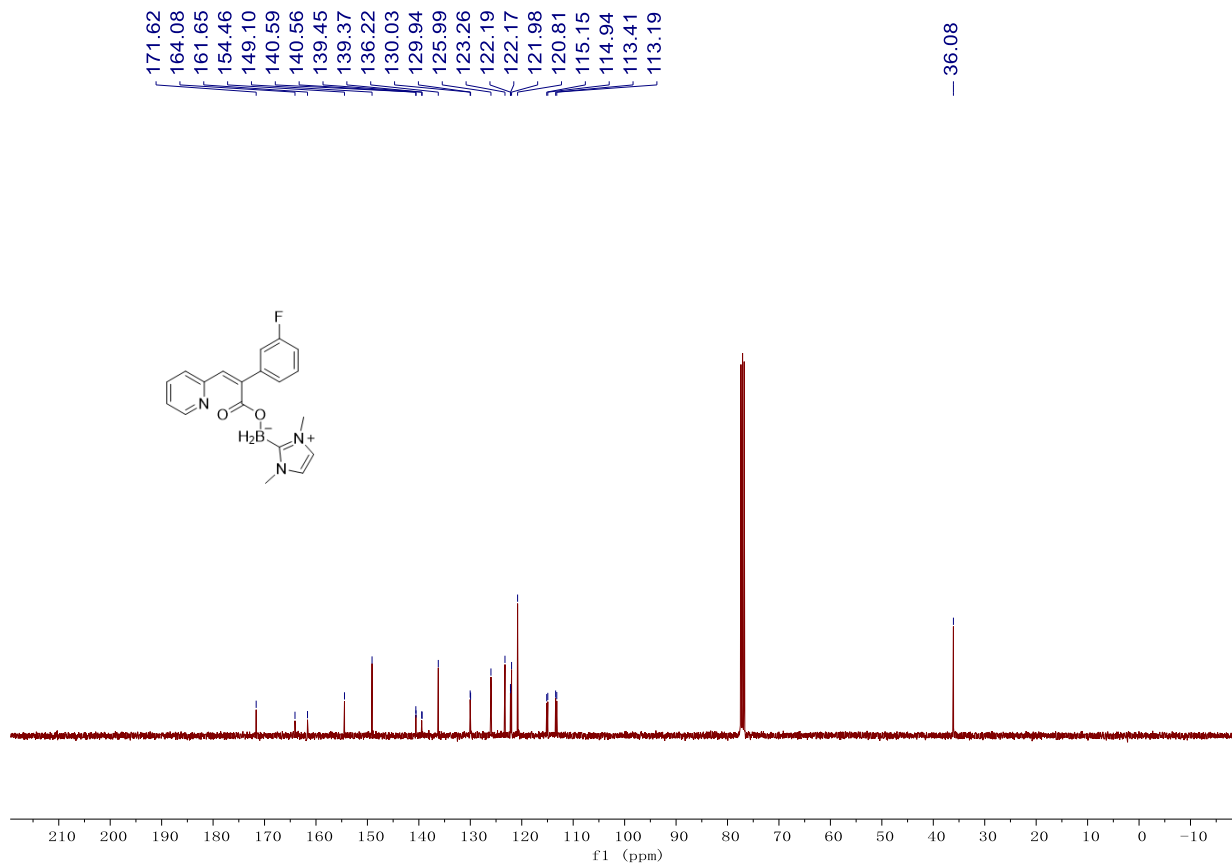

$^{11}\text{B}$  NMR spectrum of compound **3p**

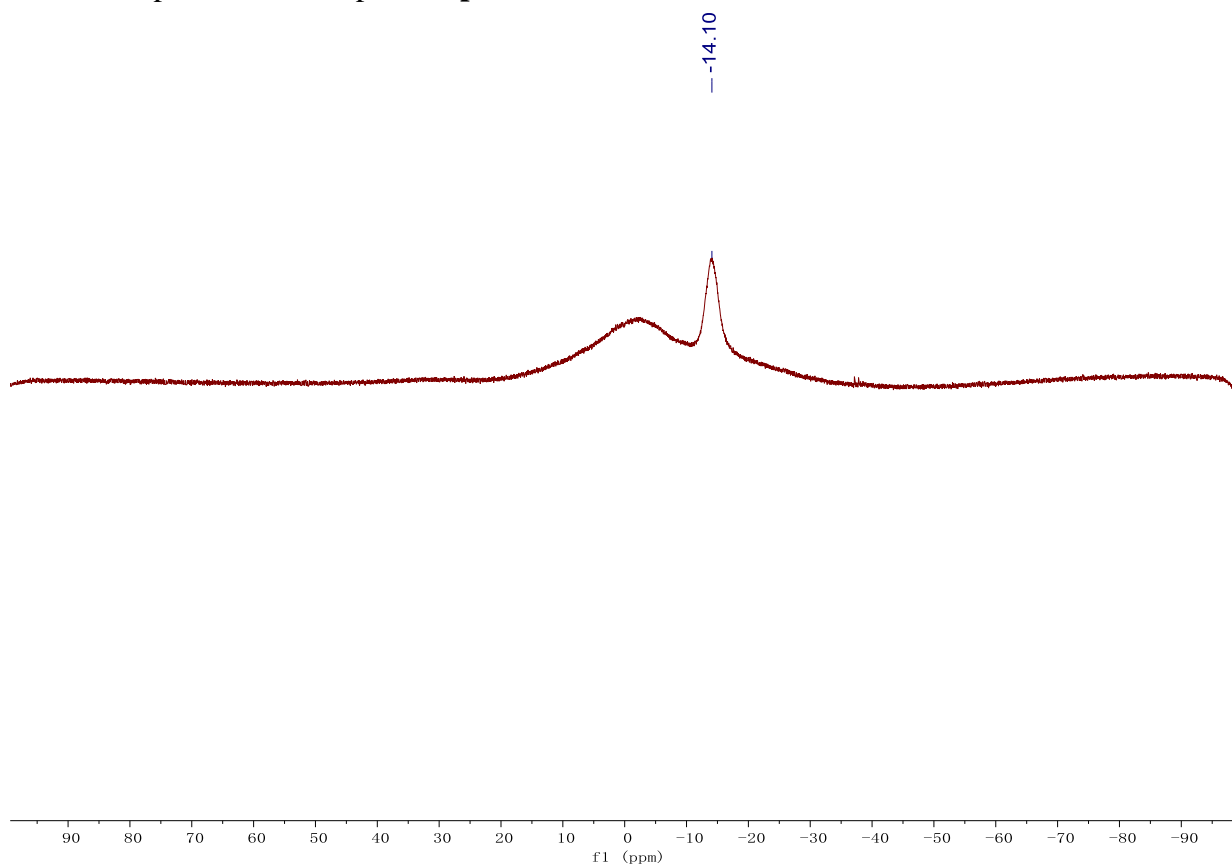

$^1\text{H}$  NMR and  $^{13}\text{C}$  NMR spectrum of compound **3q**

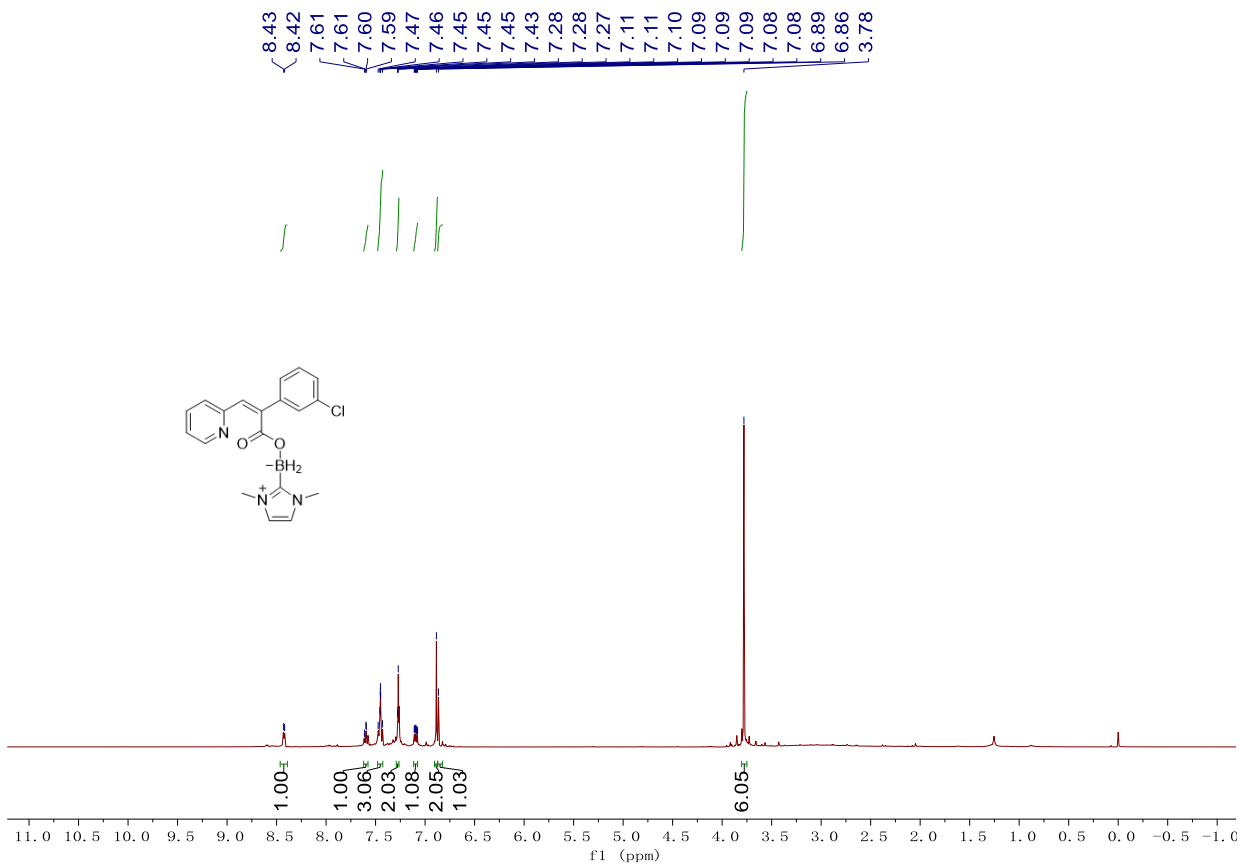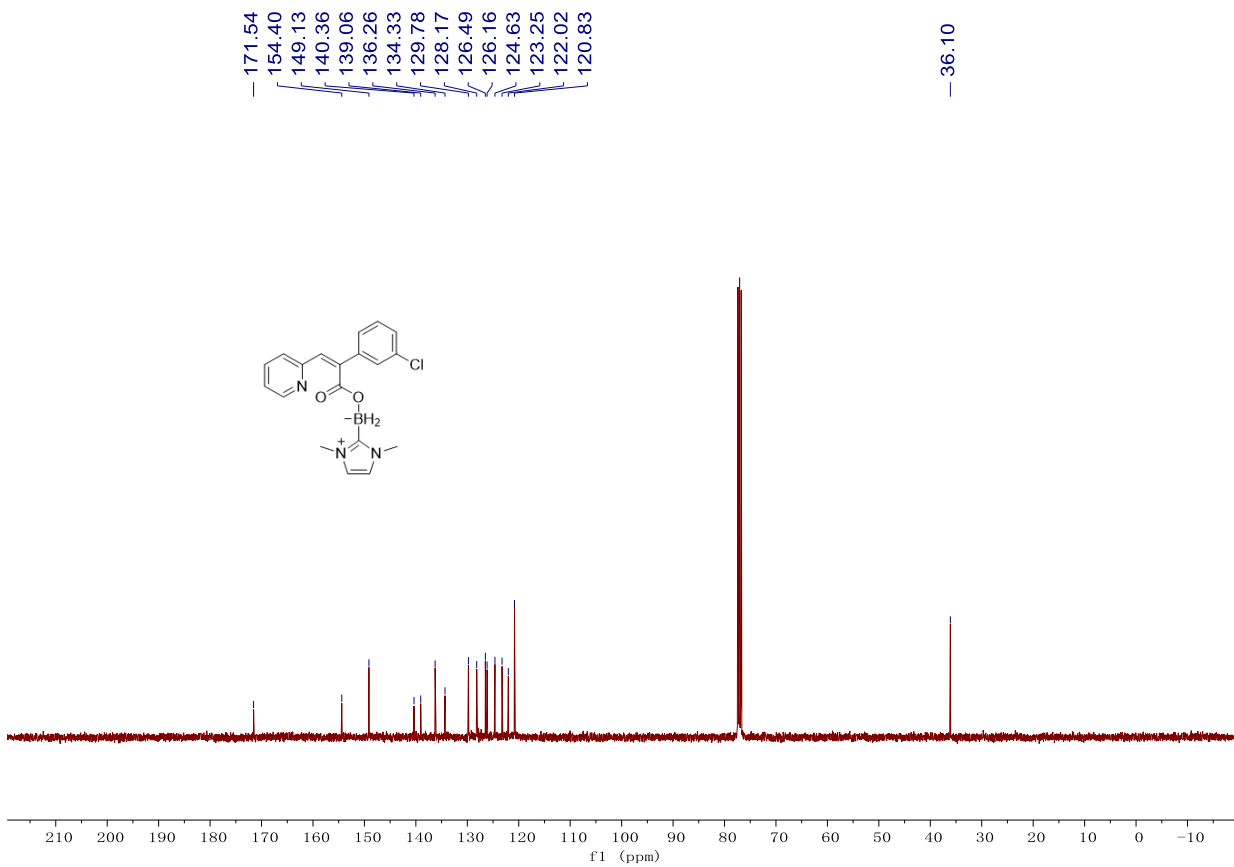

<sup>11</sup>B NMR spectrum of compound **3q**



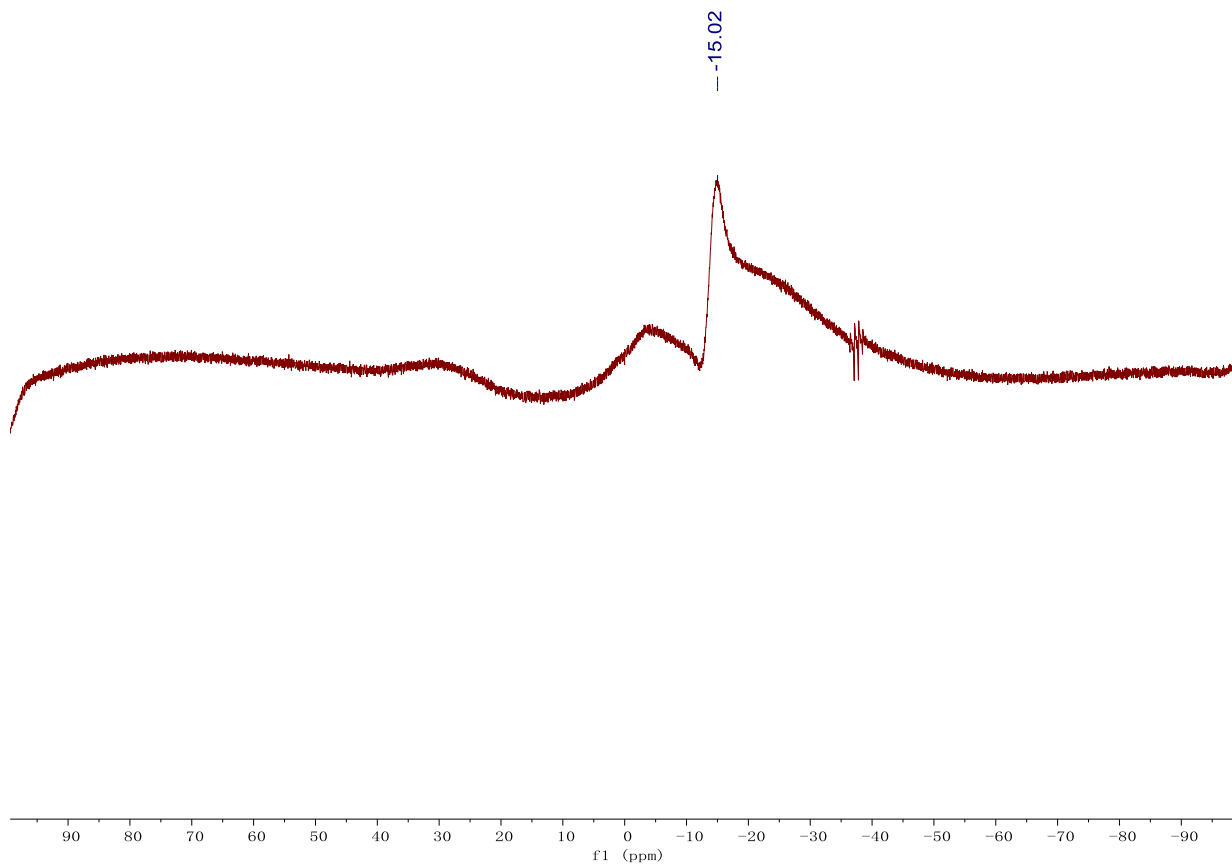

<sup>1</sup>H NMR and <sup>13</sup>C NMR spectrum of compound **3r**

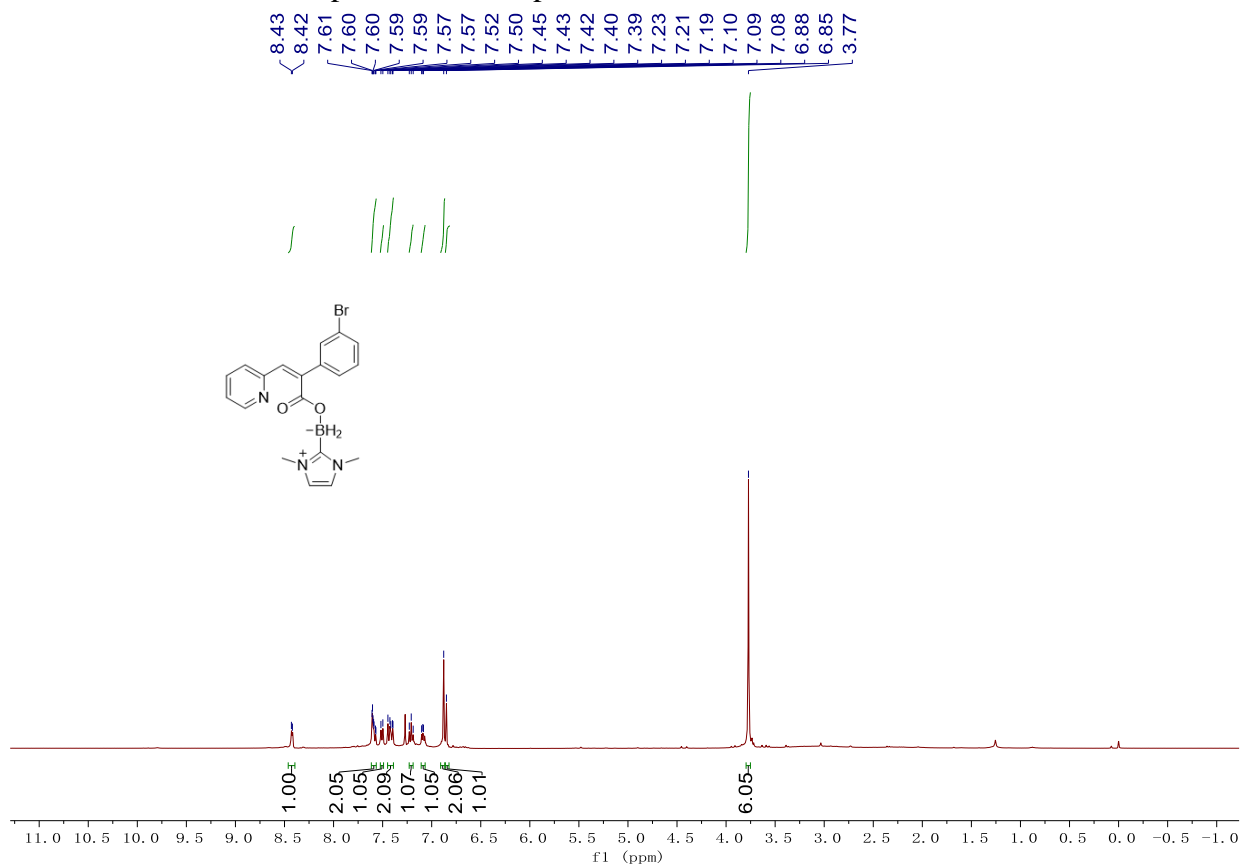

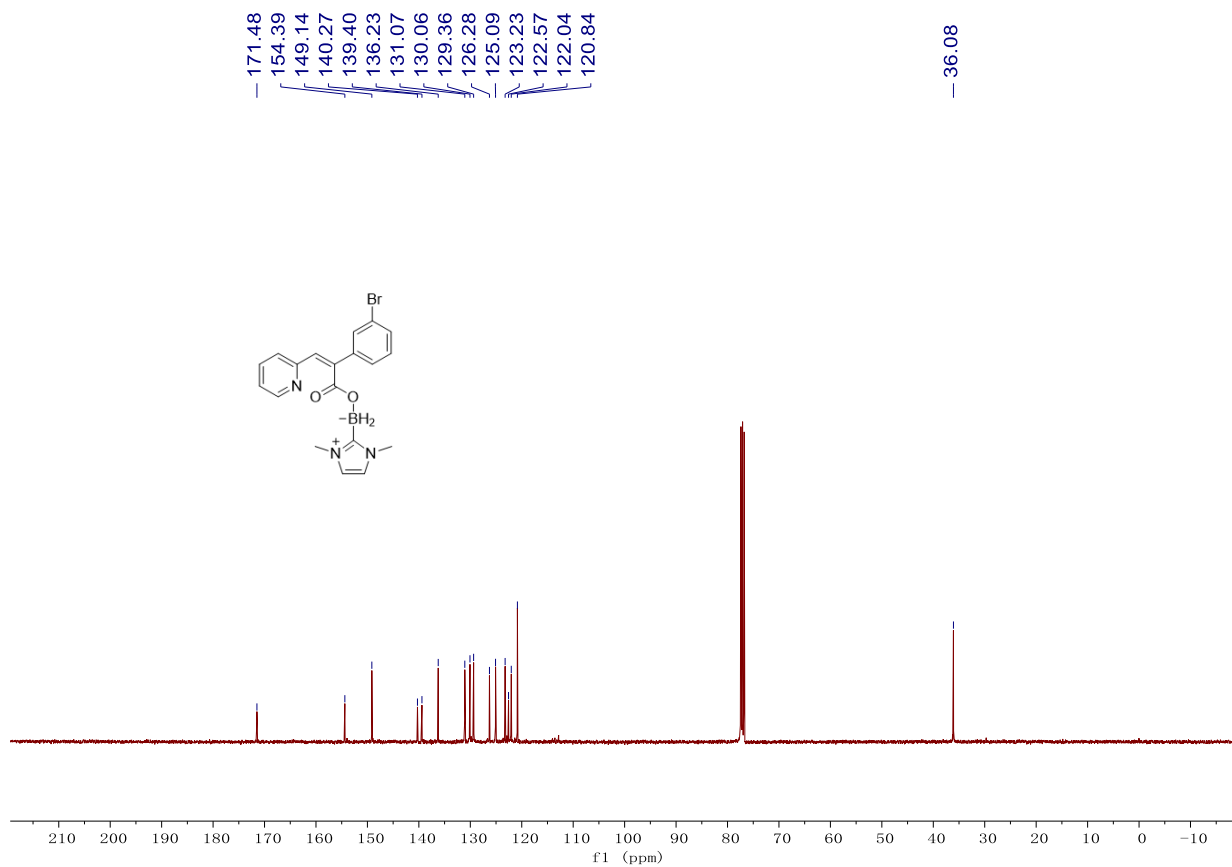

$^{11}\text{B}$  NMR spectrum of compound **3r**

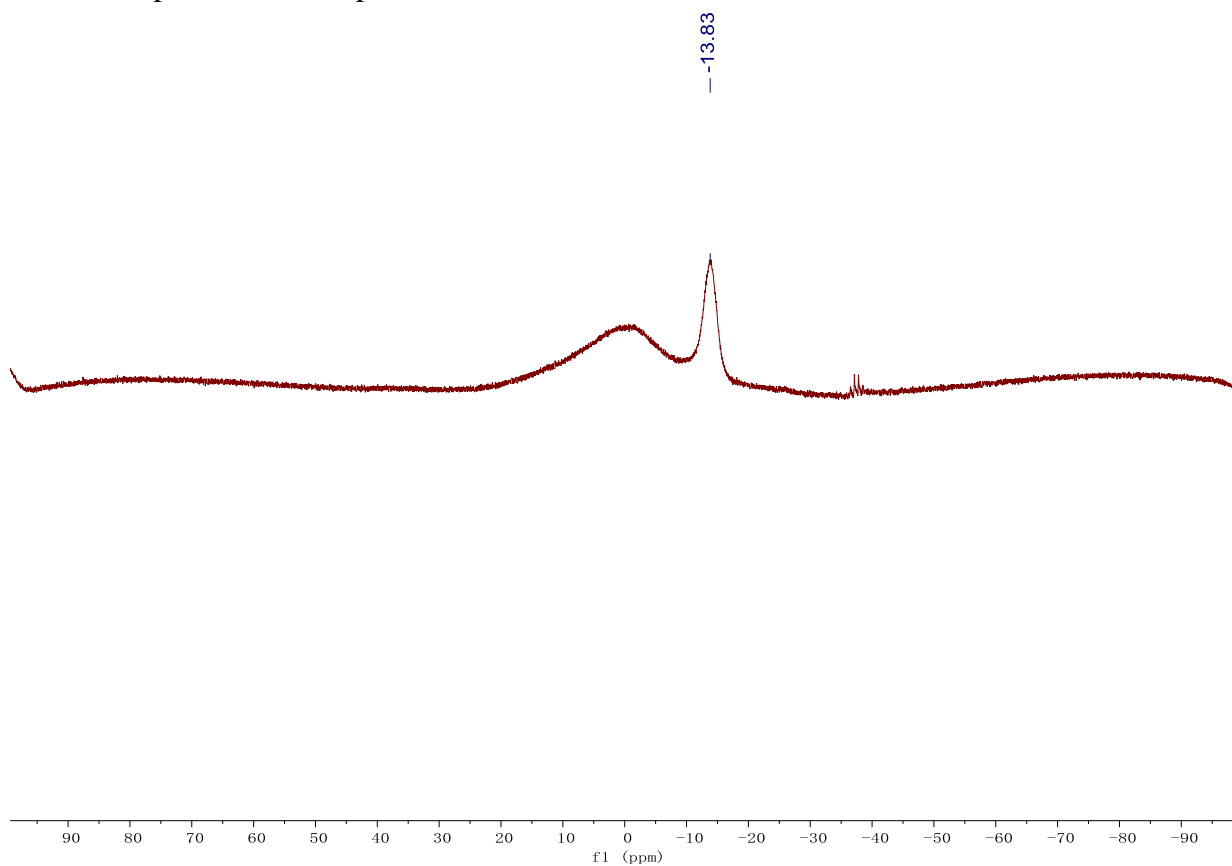

$^1\text{H}$  NMR and  $^{13}\text{C}$  NMR spectrum of compound **3s**

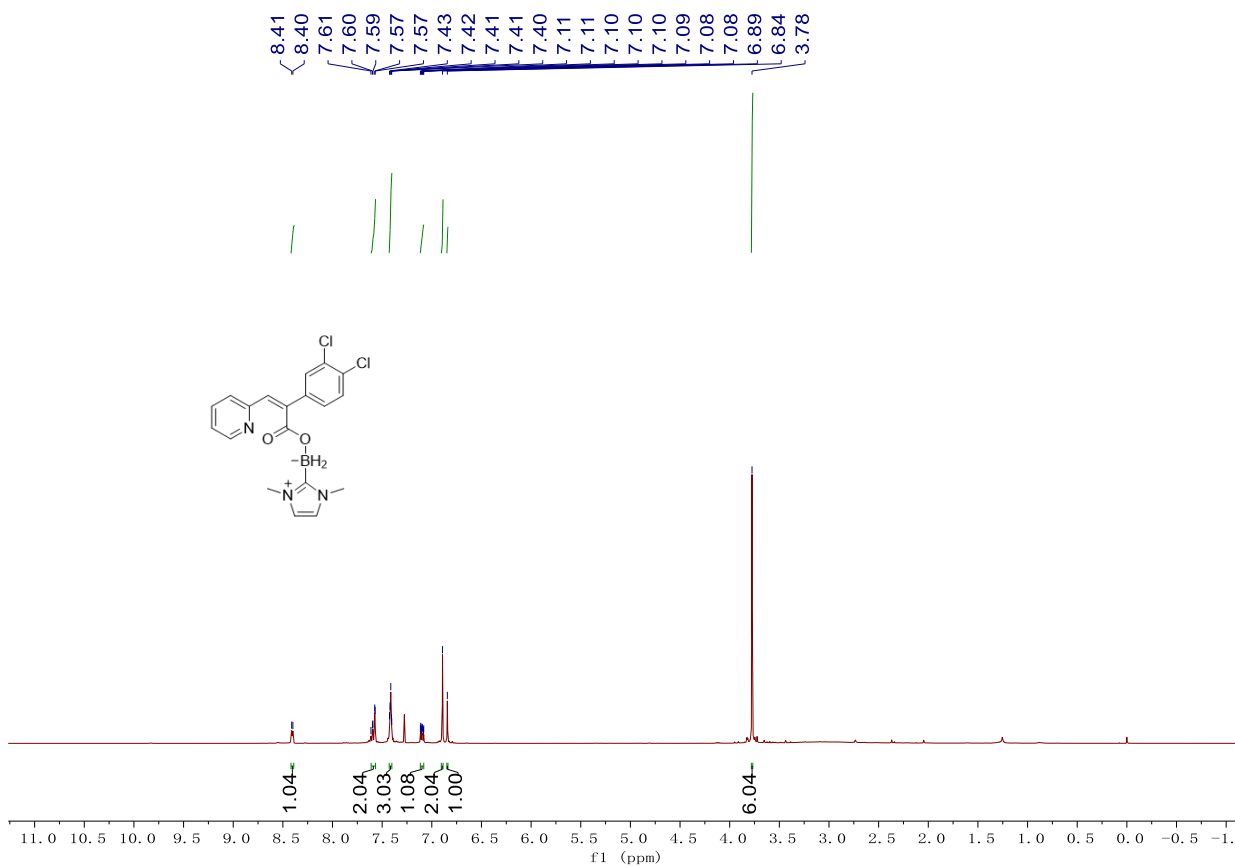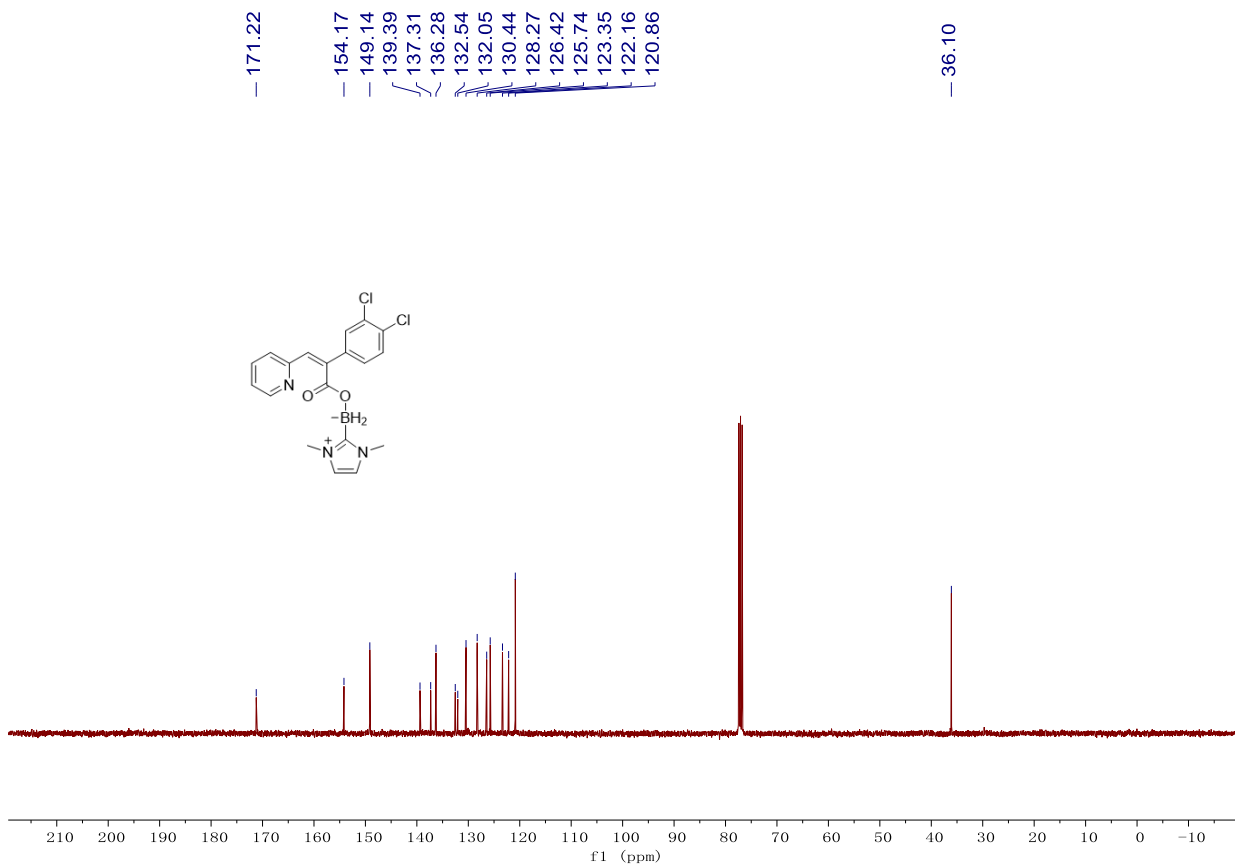

<sup>11</sup>B NMR spectrum of compound **3s**

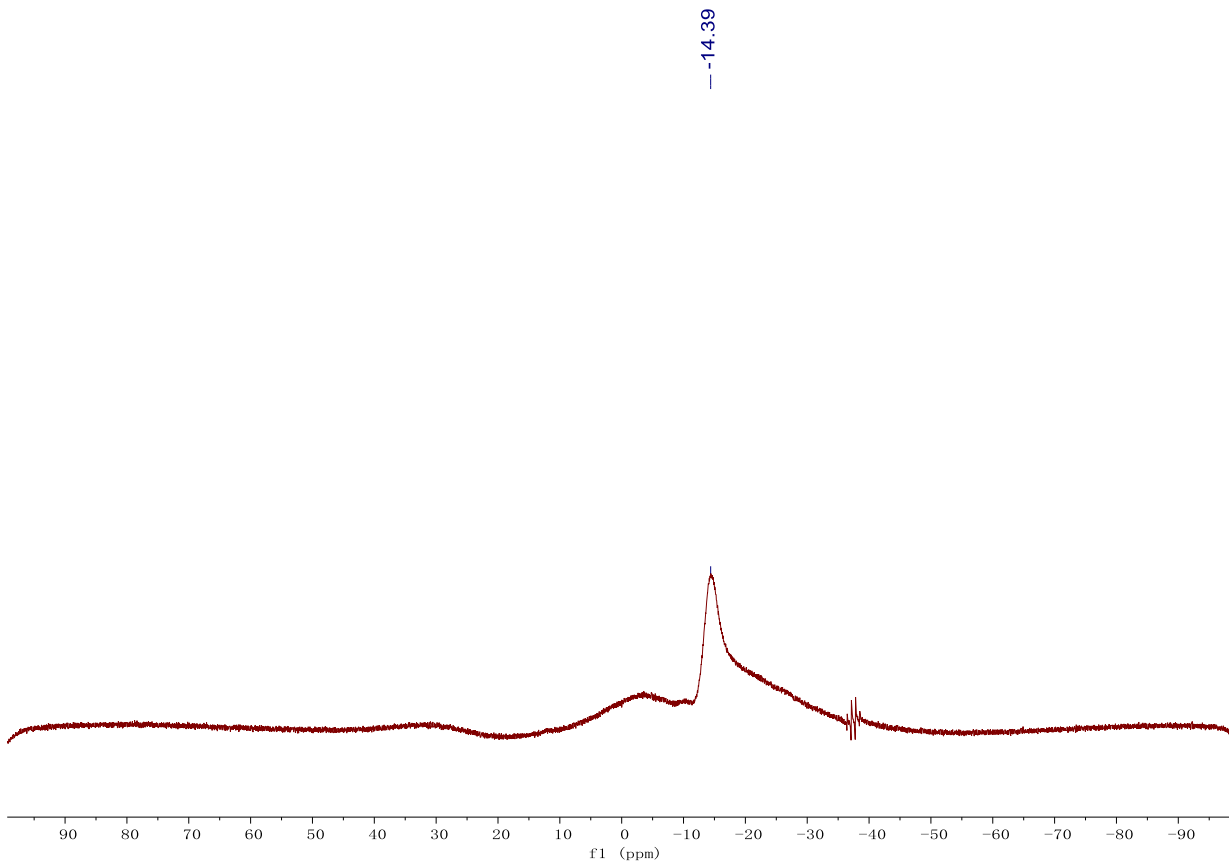

<sup>1</sup>H NMR and <sup>13</sup>C NMR spectrum of compound **3t**

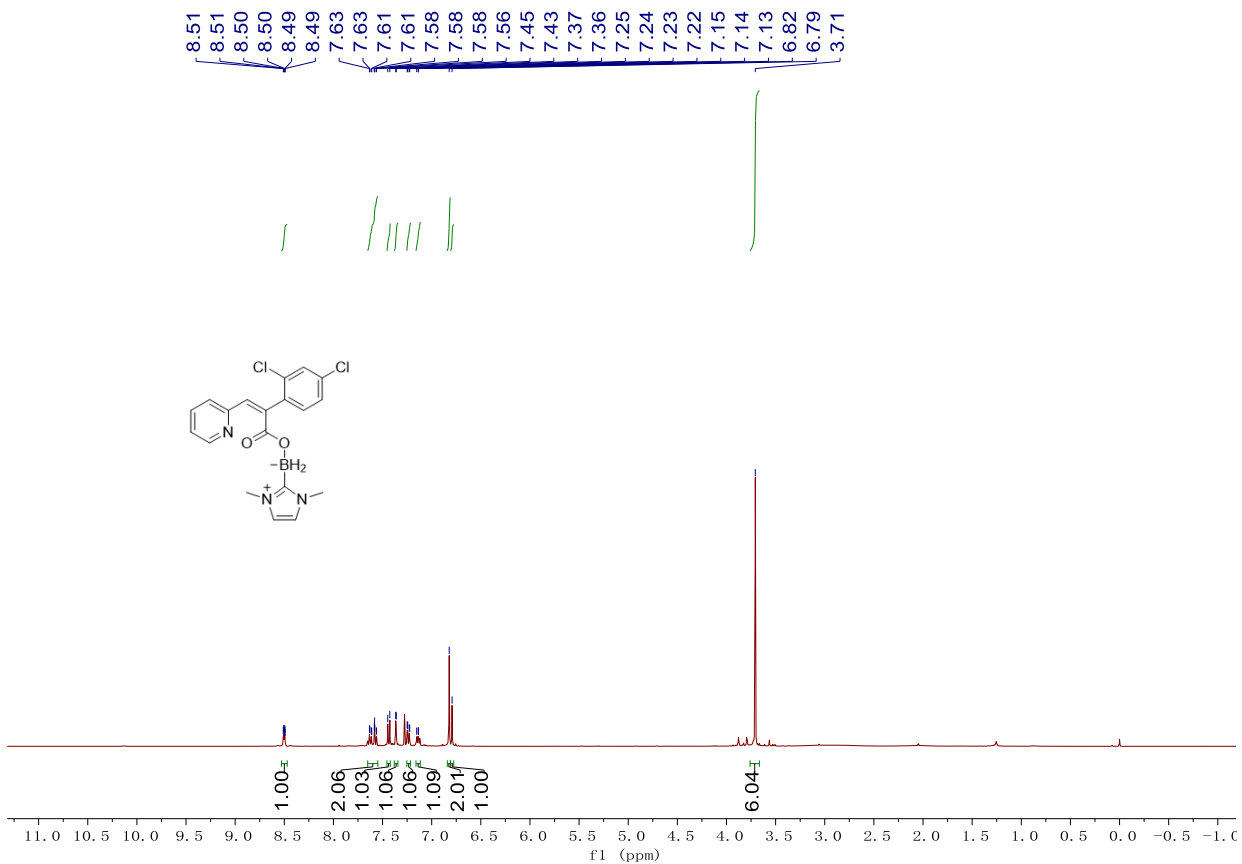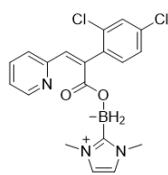

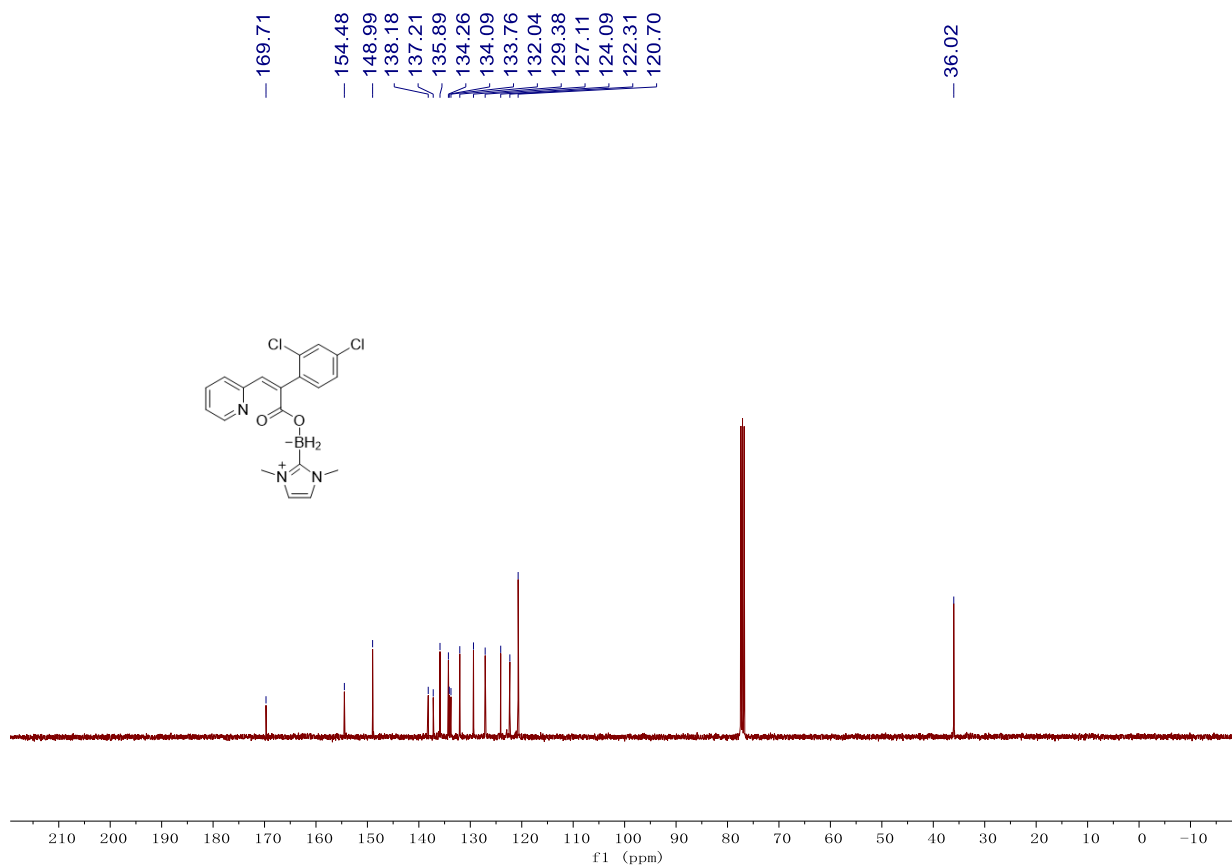

<sup>11</sup>B NMR spectrum of compound **3t**

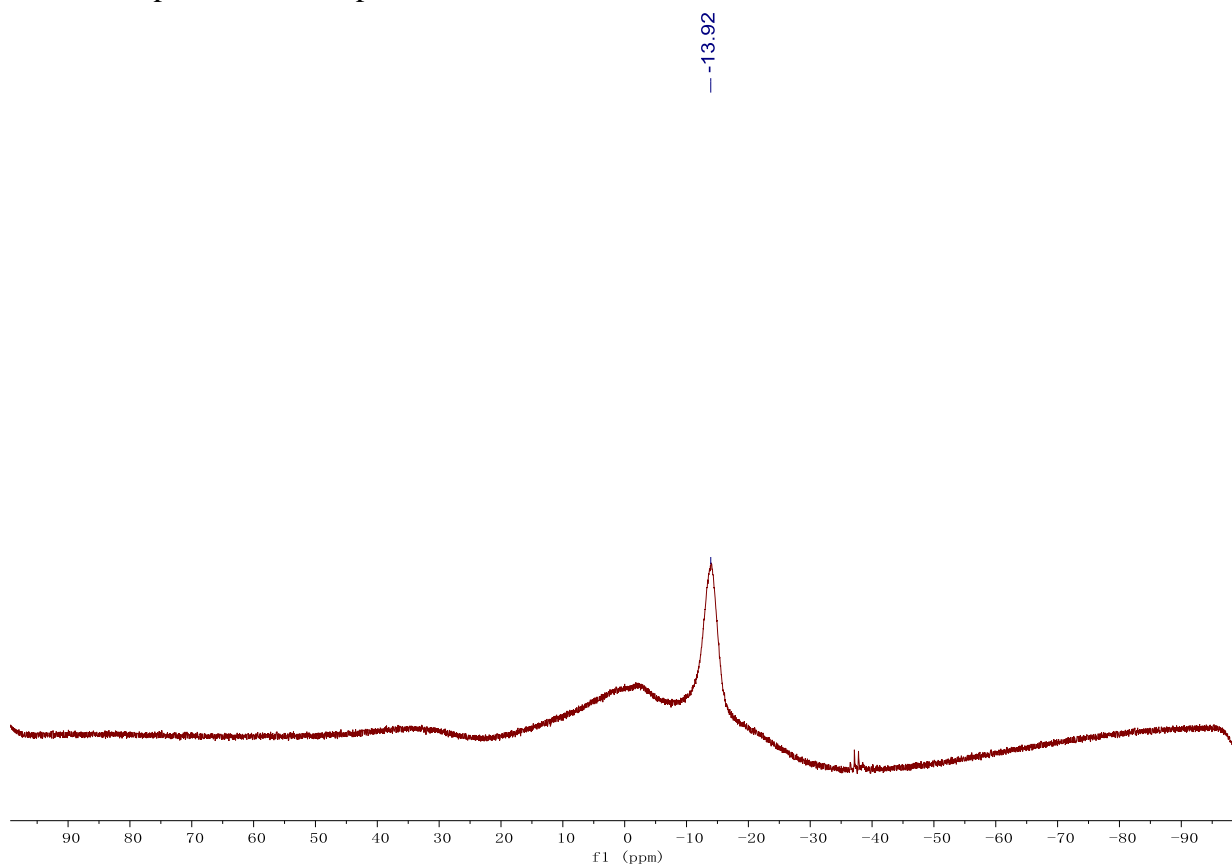

<sup>1</sup>H NMR and <sup>13</sup>C NMR spectrum of compound **3u**

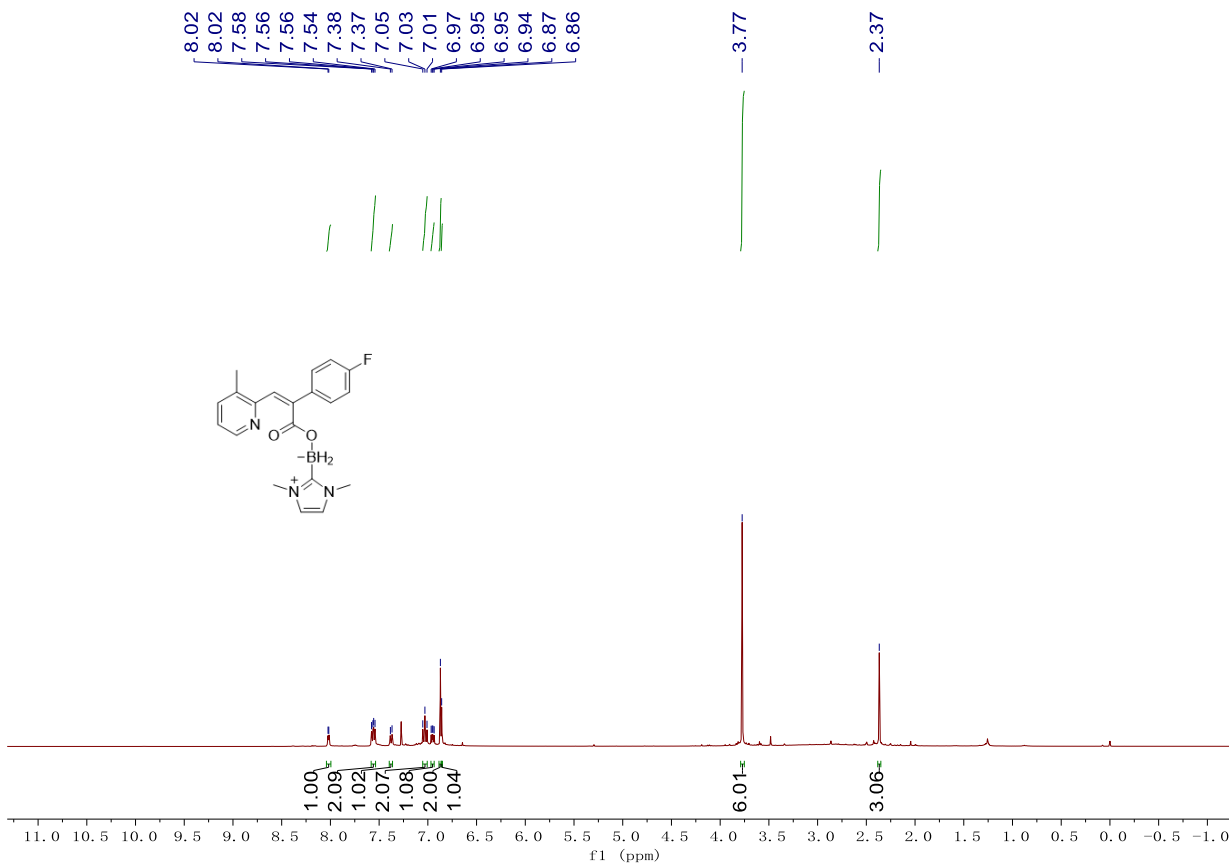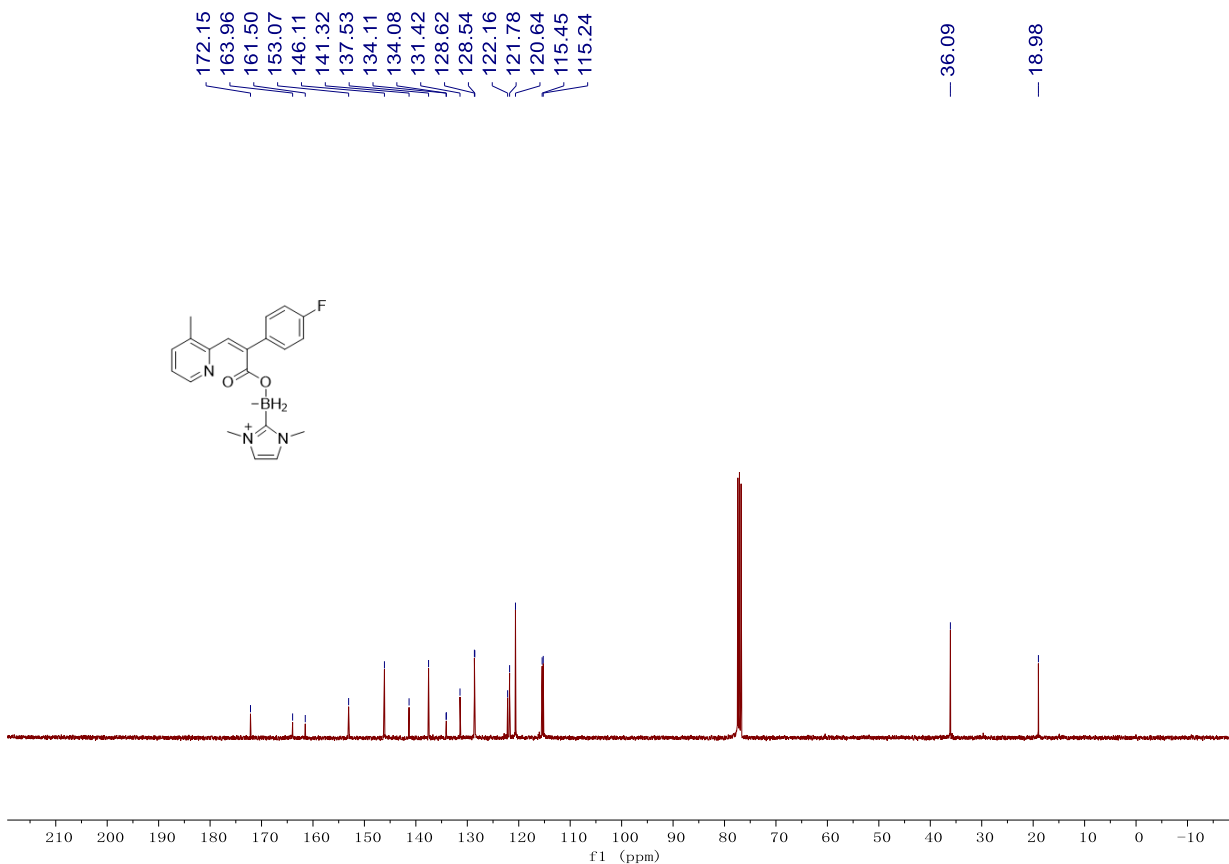

<sup>11</sup>B NMR spectrum of compound **3u**

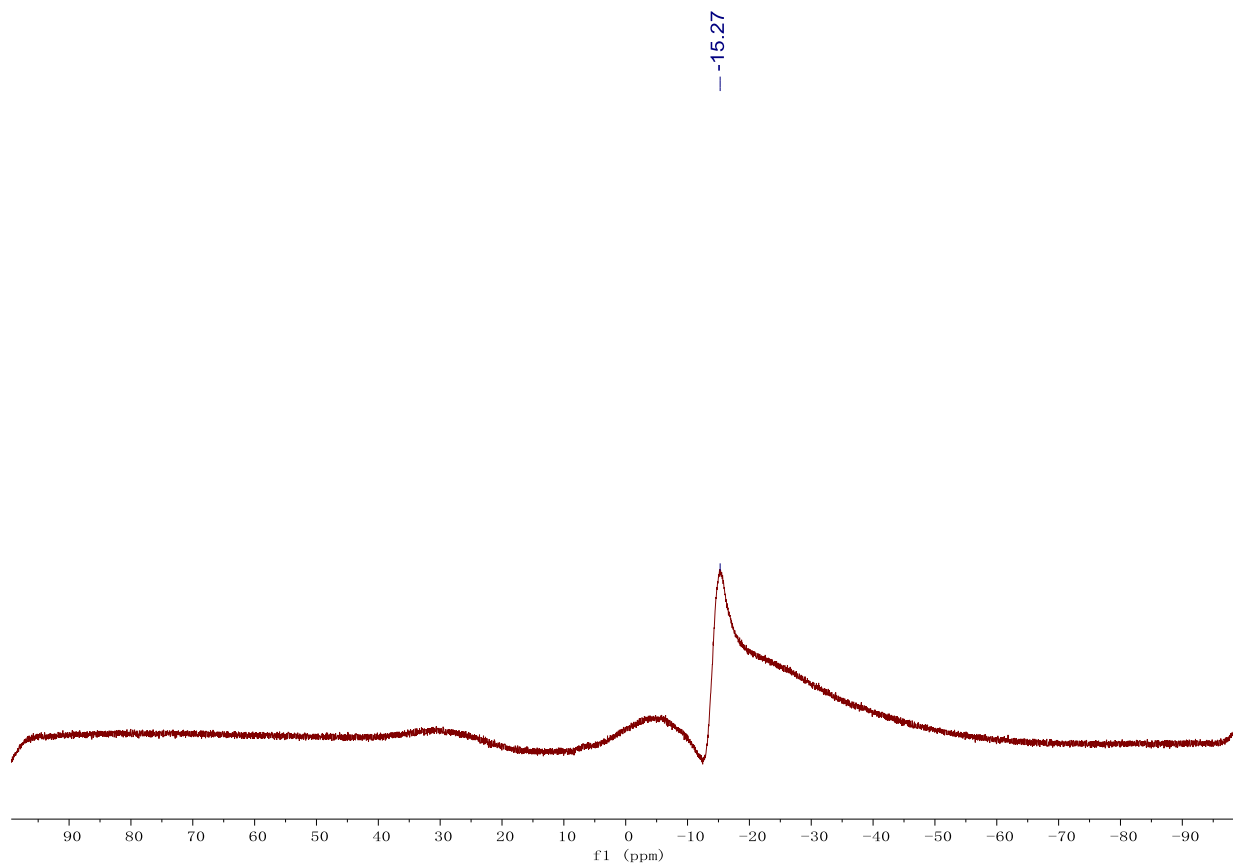

<sup>1</sup>H NMR and <sup>13</sup>C NMR spectrum of compound 3v

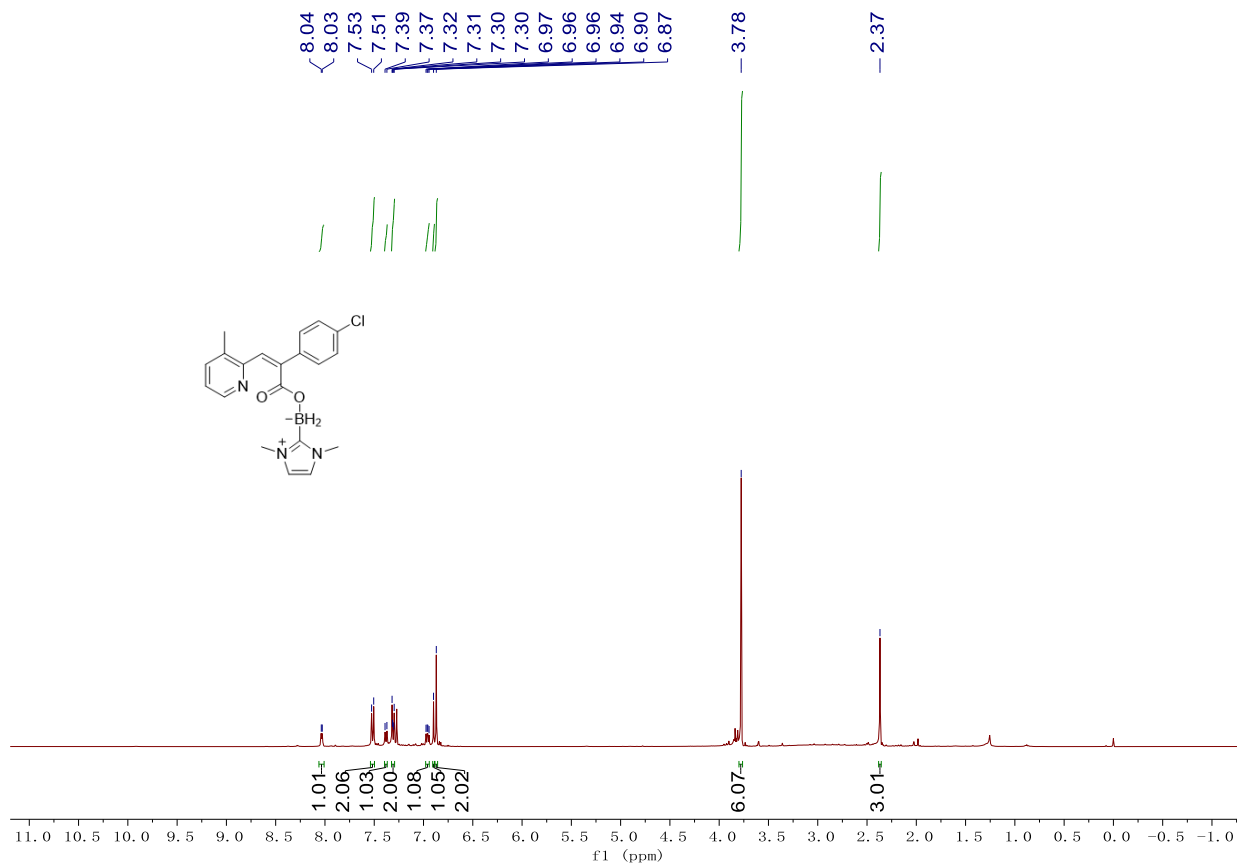

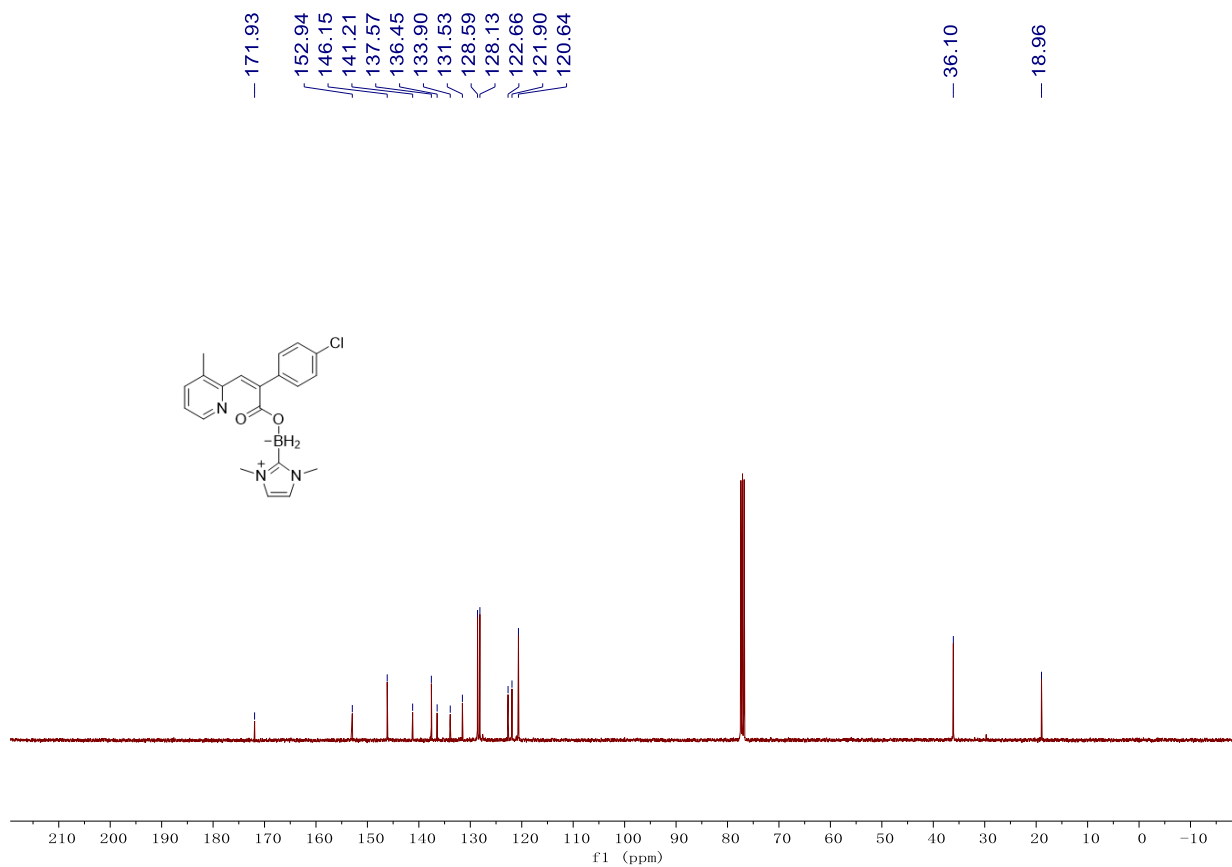

$^{11}\text{B}$  NMR spectrum of compound **3v**

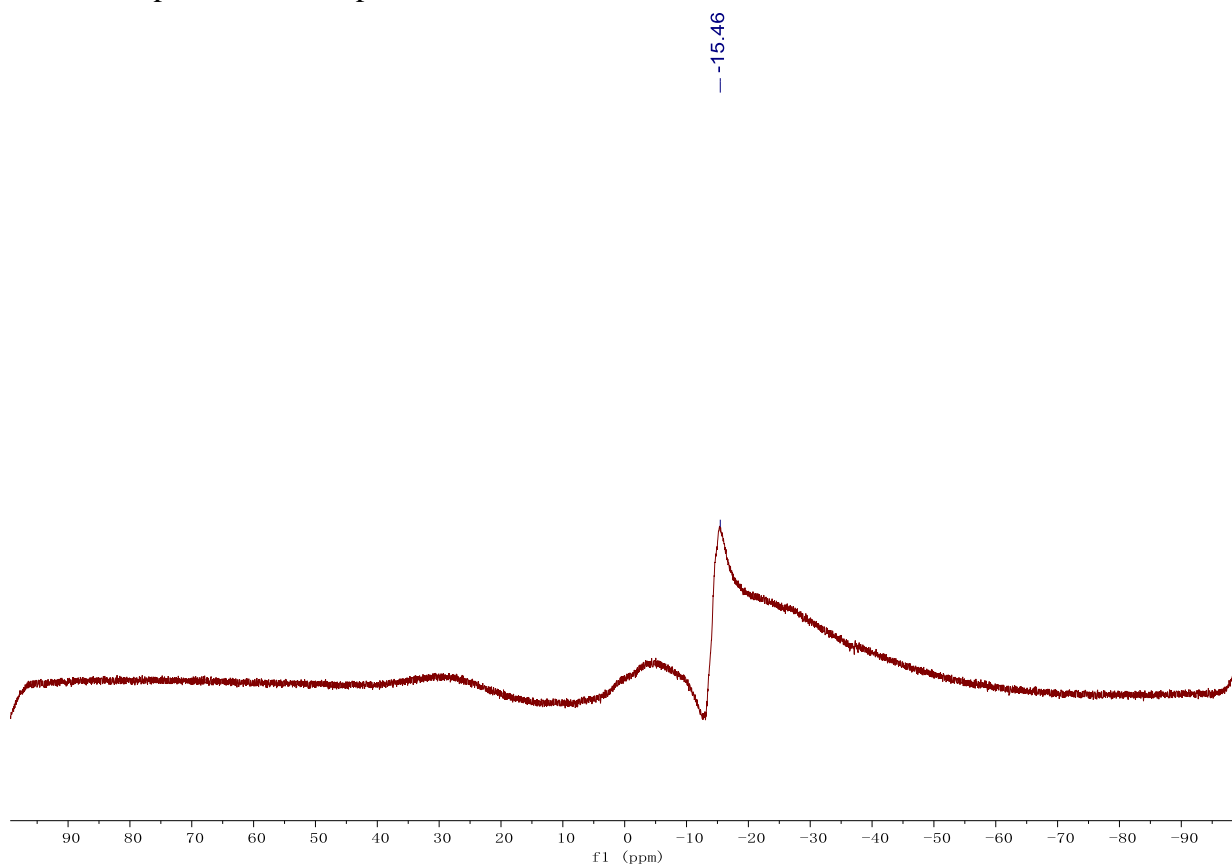



$^1\text{H}$  NMR and  $^{13}\text{C}$  NMR spectrum of compound **3w**

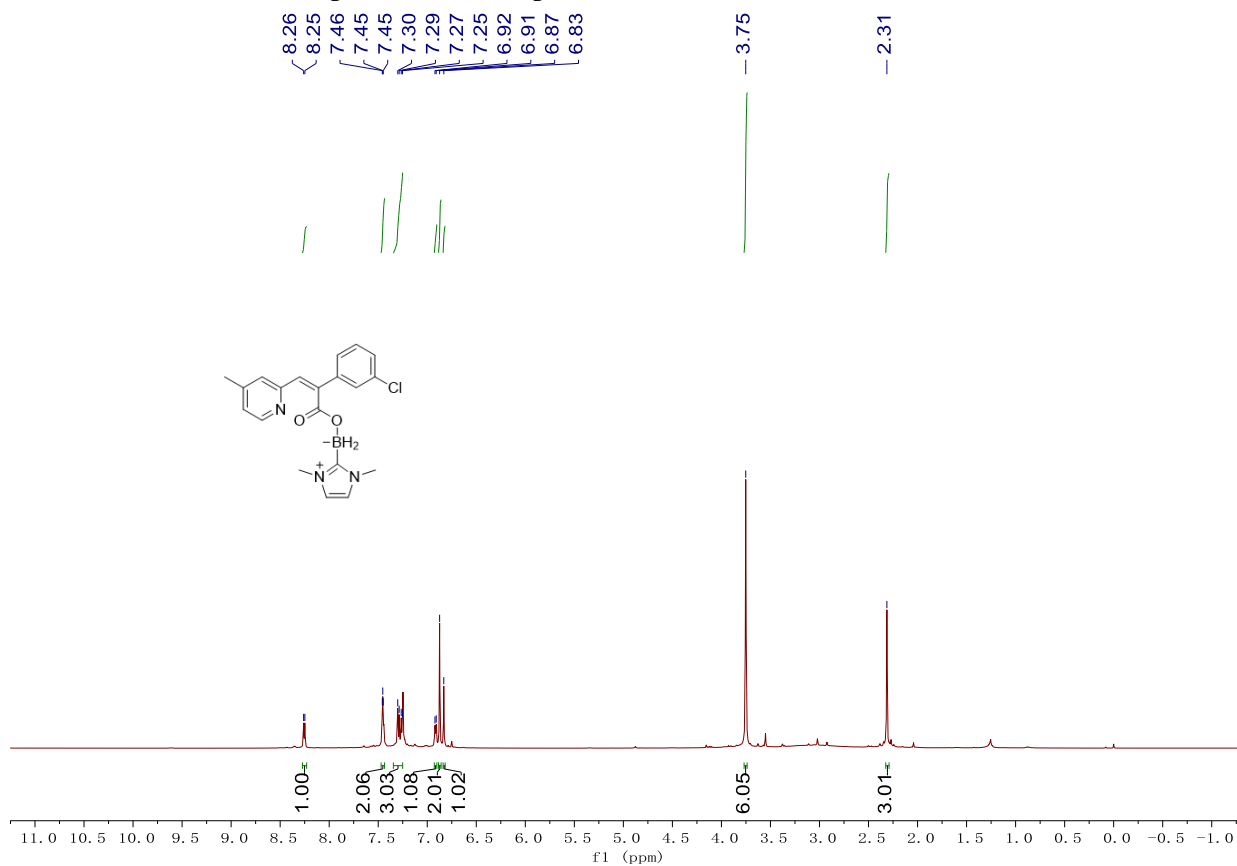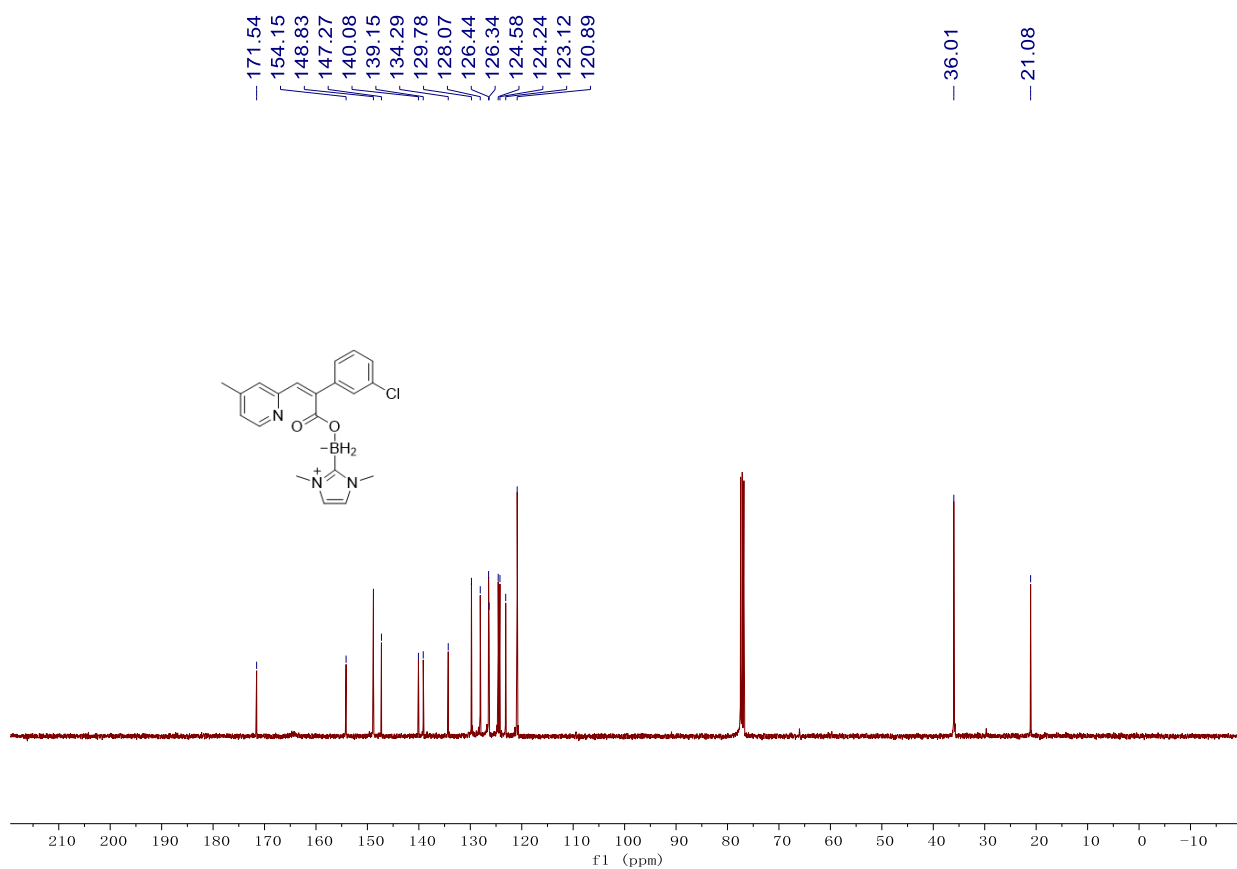

$^{11}\text{B}$  NMR spectrum of compound **3w**

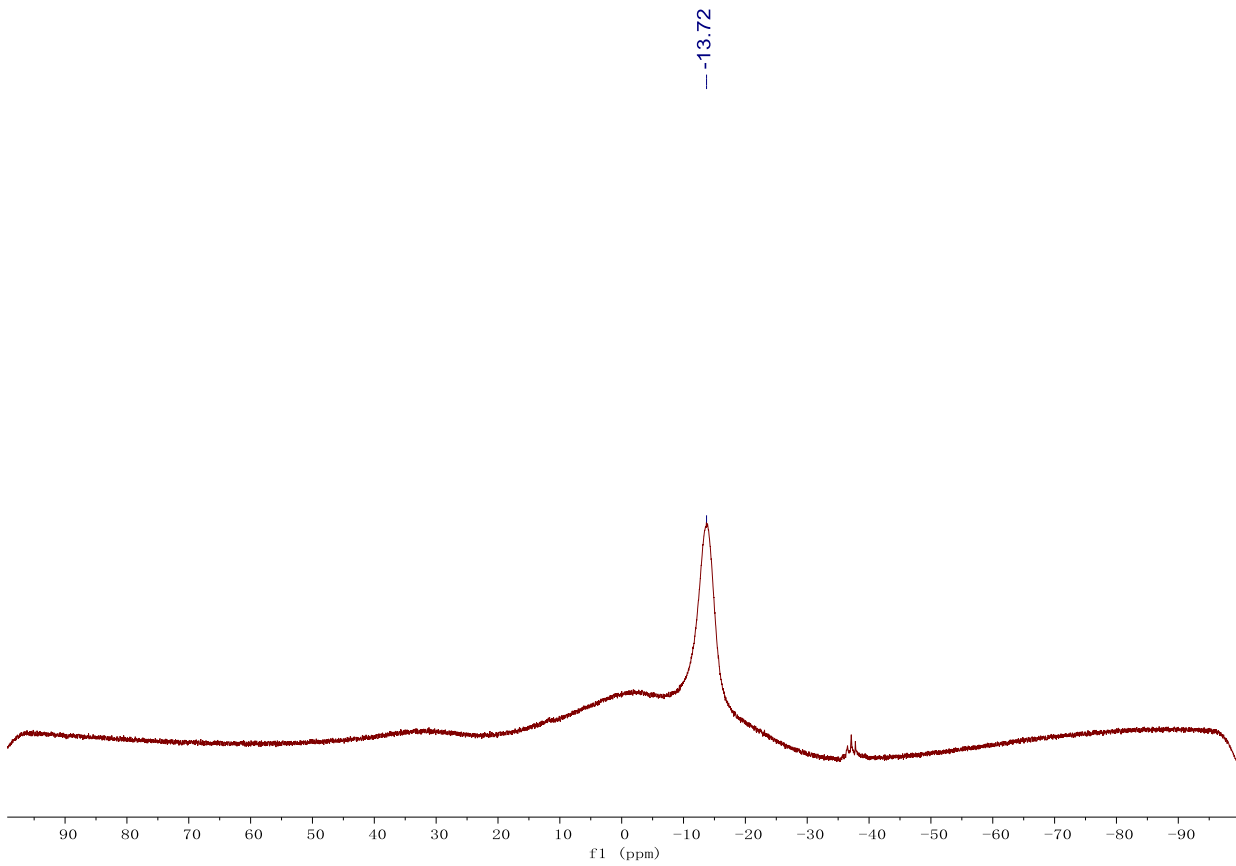

<sup>1</sup>H NMR and <sup>13</sup>C NMR spectrum of compound **3x**

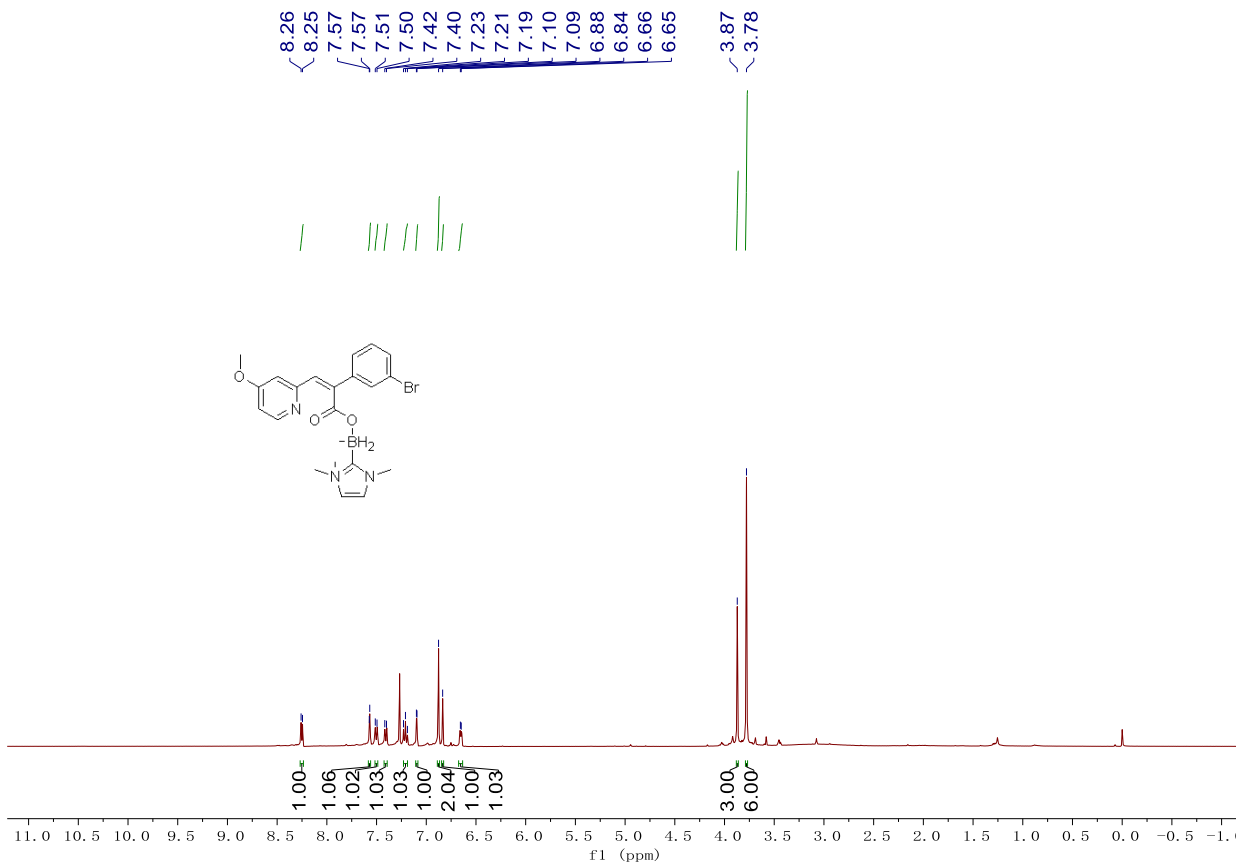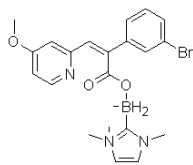

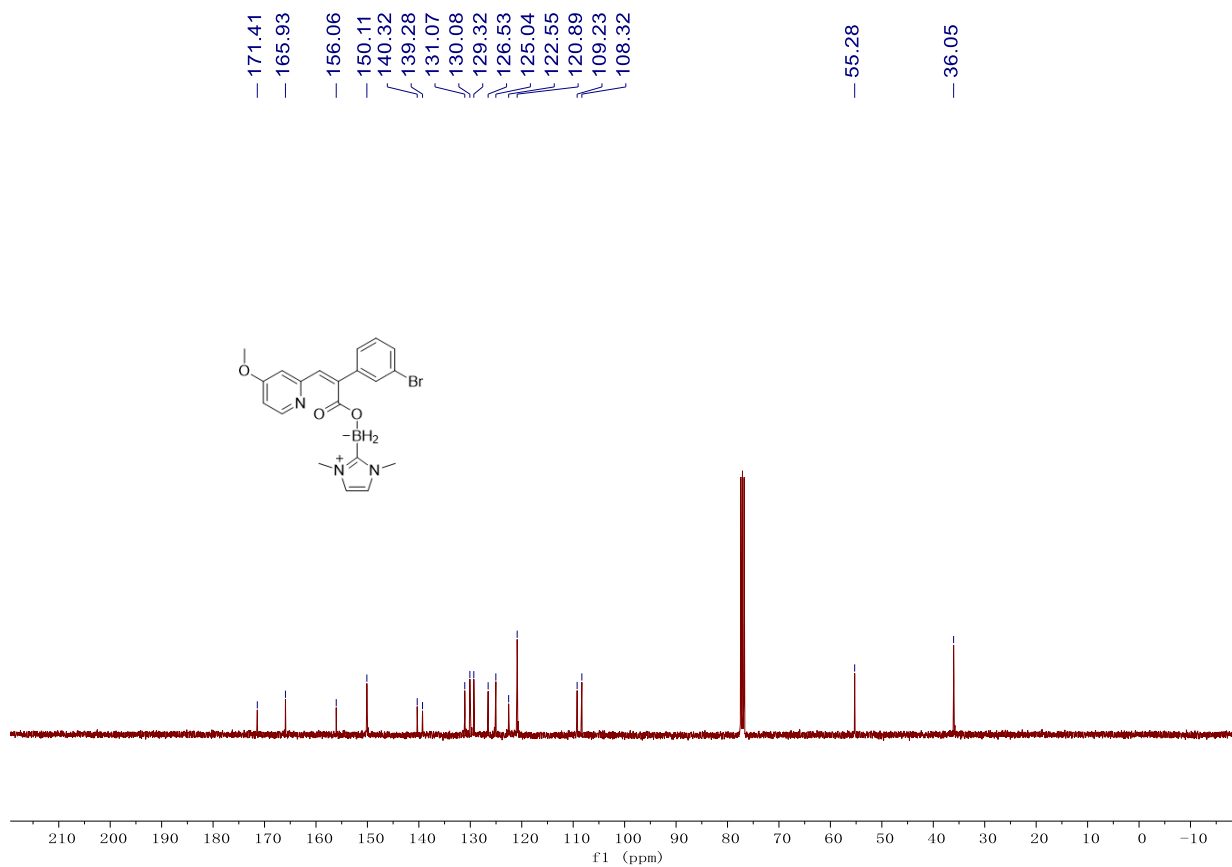

$^{11}\text{B}$  NMR spectrum of compound **3x**

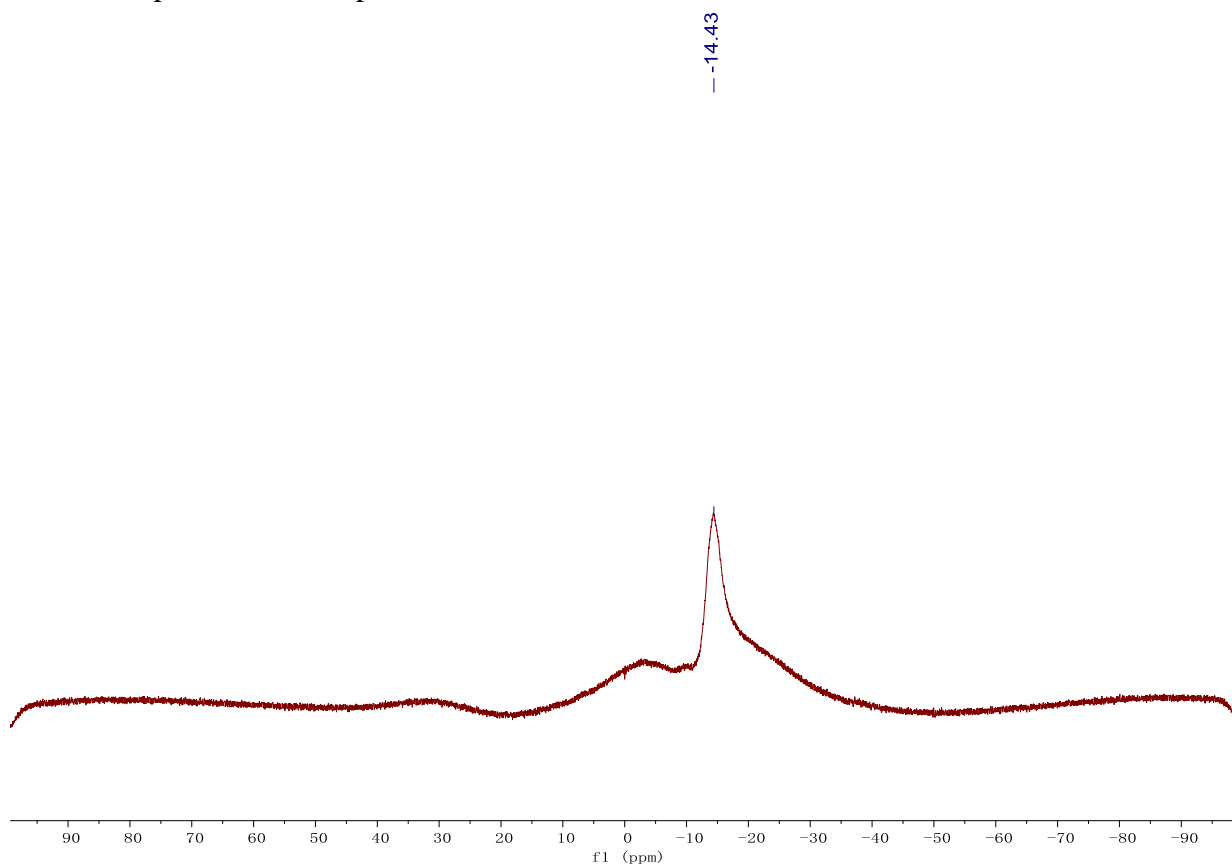

$^1\text{H}$  NMR and  $^{13}\text{C}$  NMR spectrum of compound **3y**

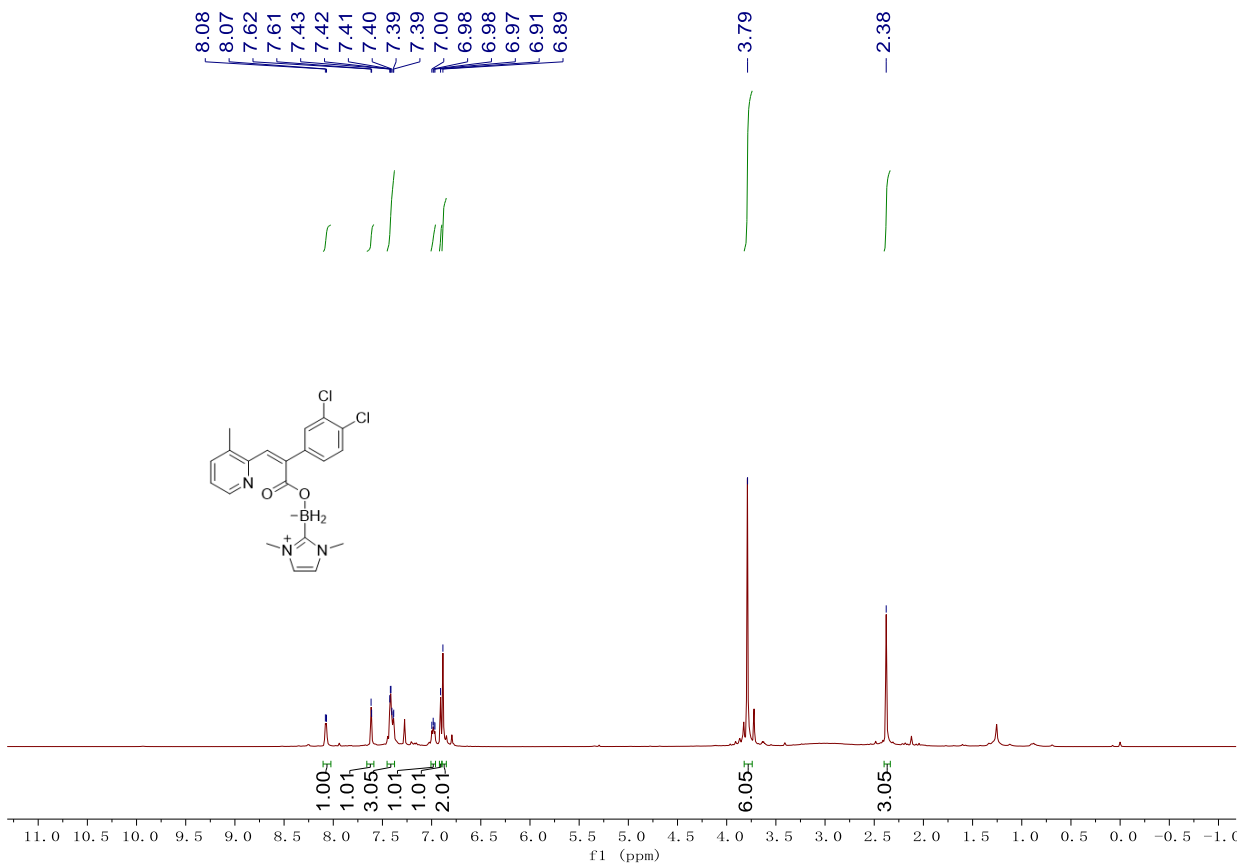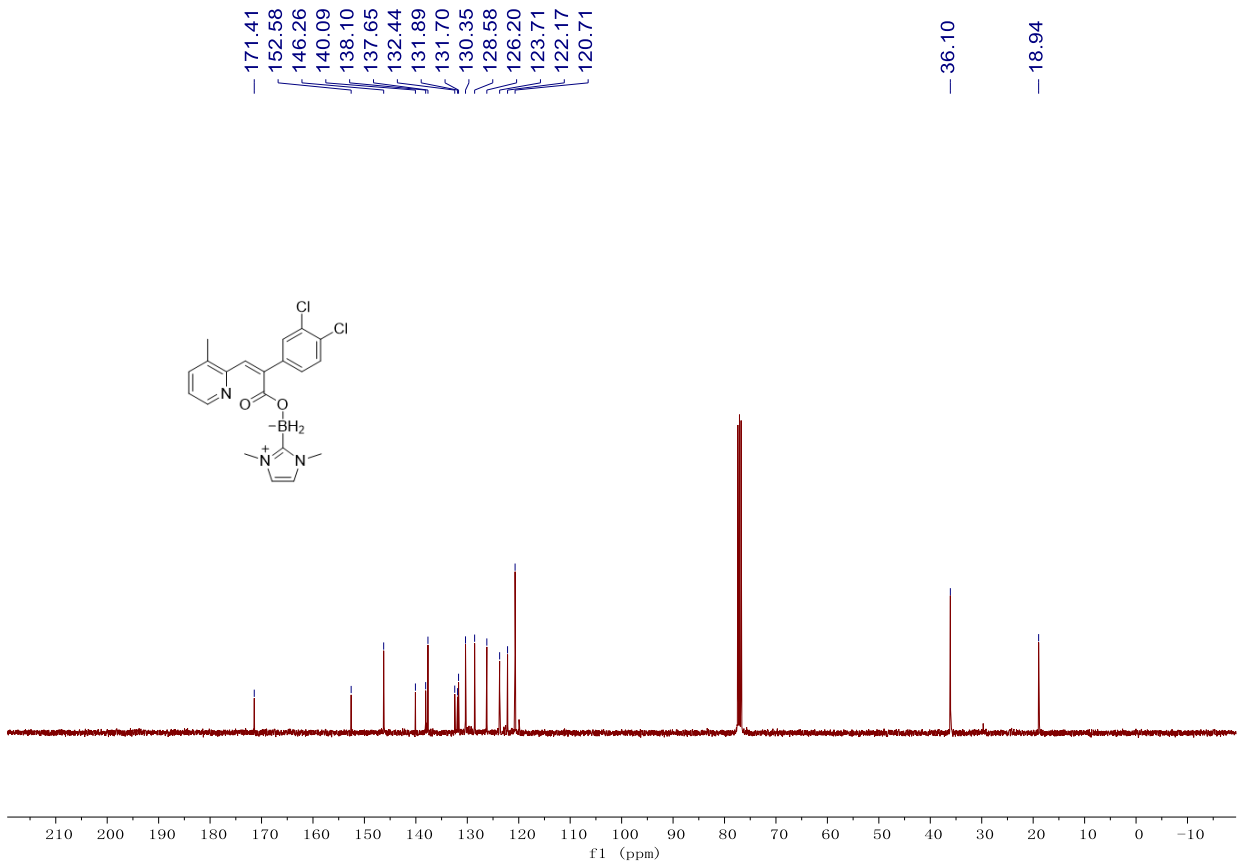

<sup>11</sup>B NMR spectrum of compound 3y

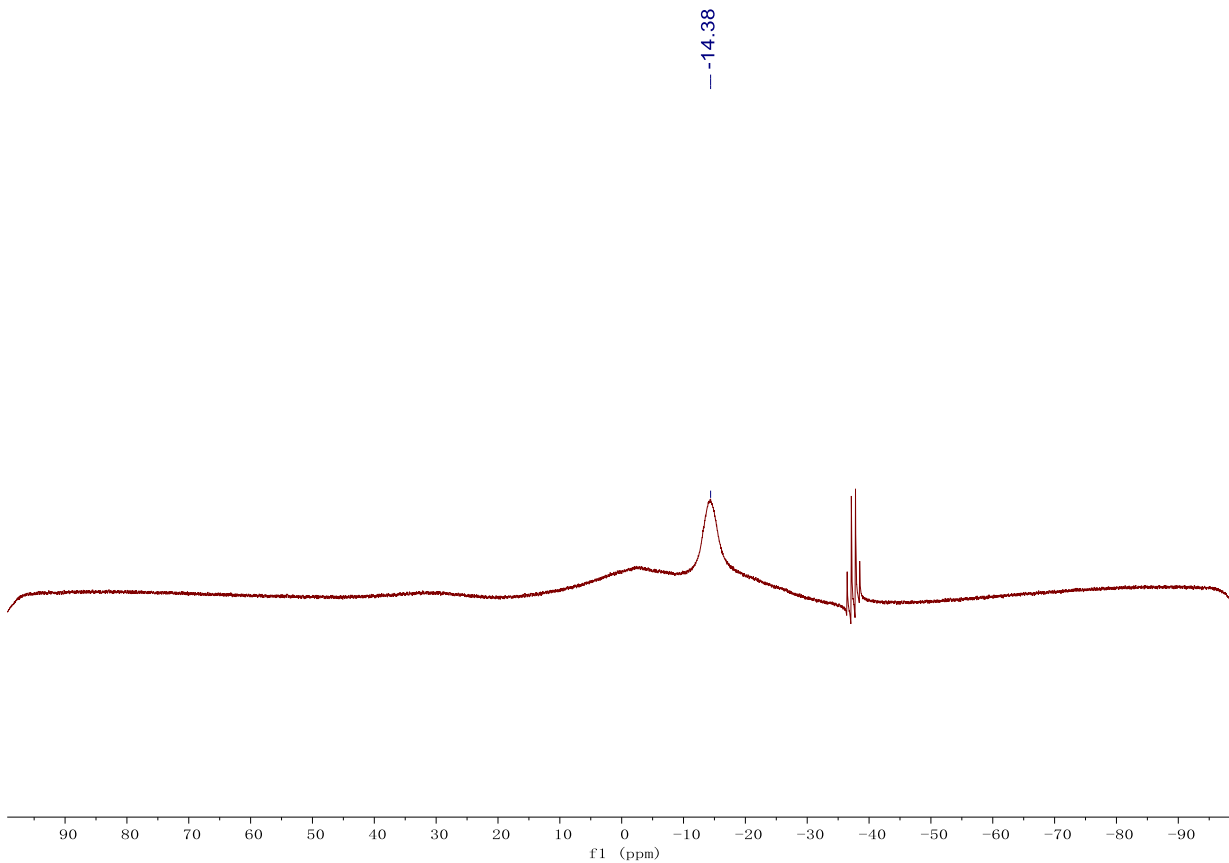

$^1\text{H}$  NMR and  $^{13}\text{C}$  NMR spectrum of compound **3z**

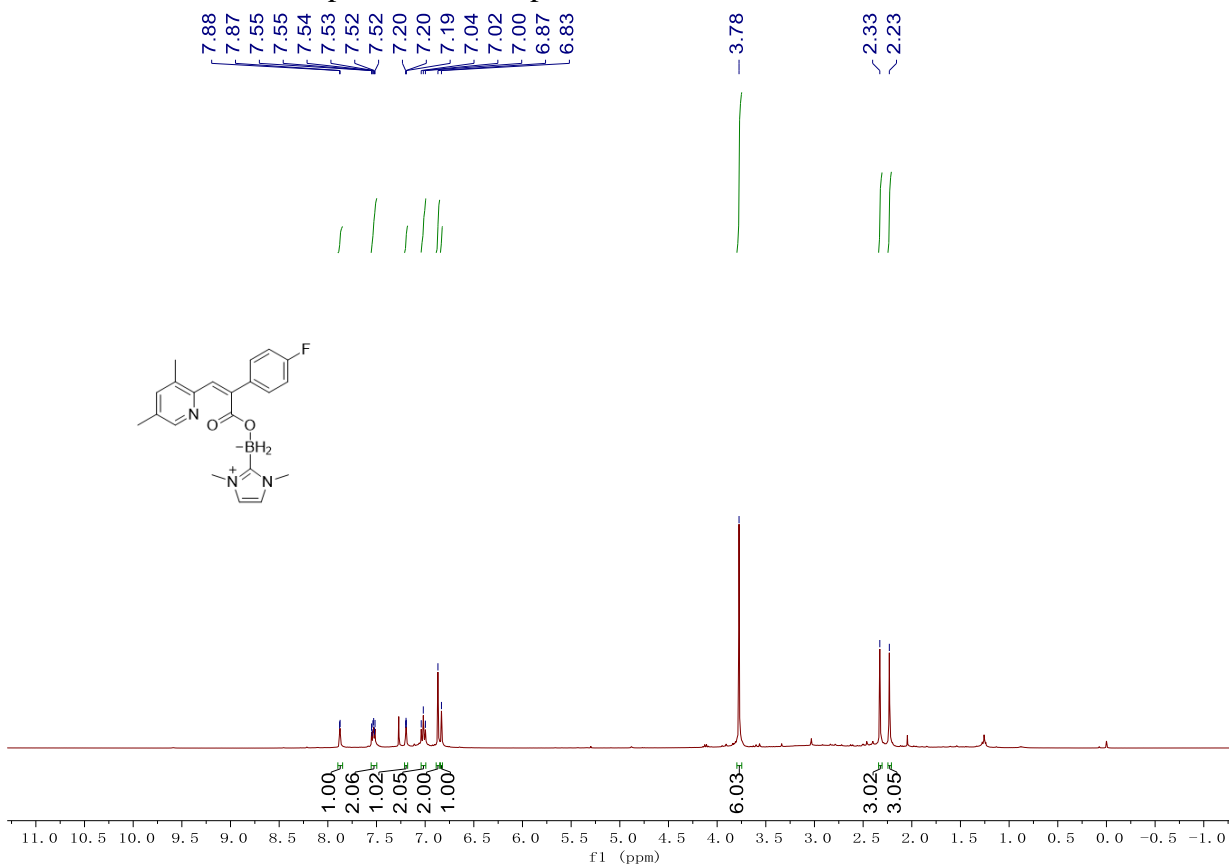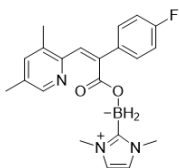

172.35  
163.86  
161.40  
150.38  
146.65  
140.48  
138.14  
134.22  
134.19  
131.25  
130.87  
128.52  
128.44  
122.34  
120.60  
115.40  
115.19

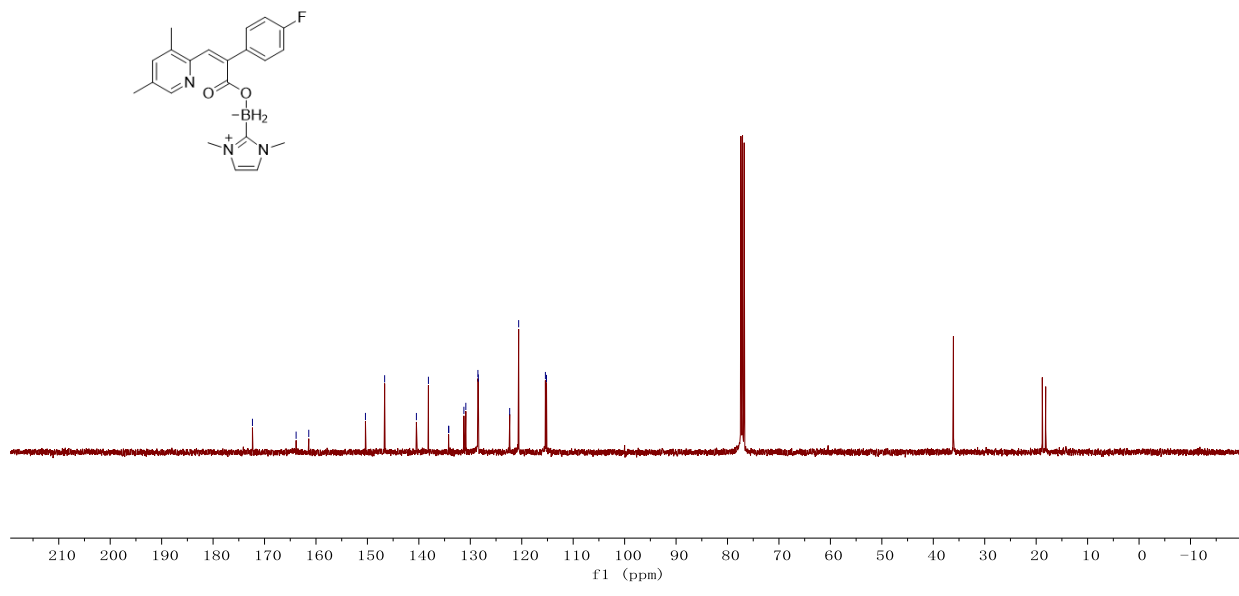

<sup>11</sup>B NMR spectrum of compound **3z**

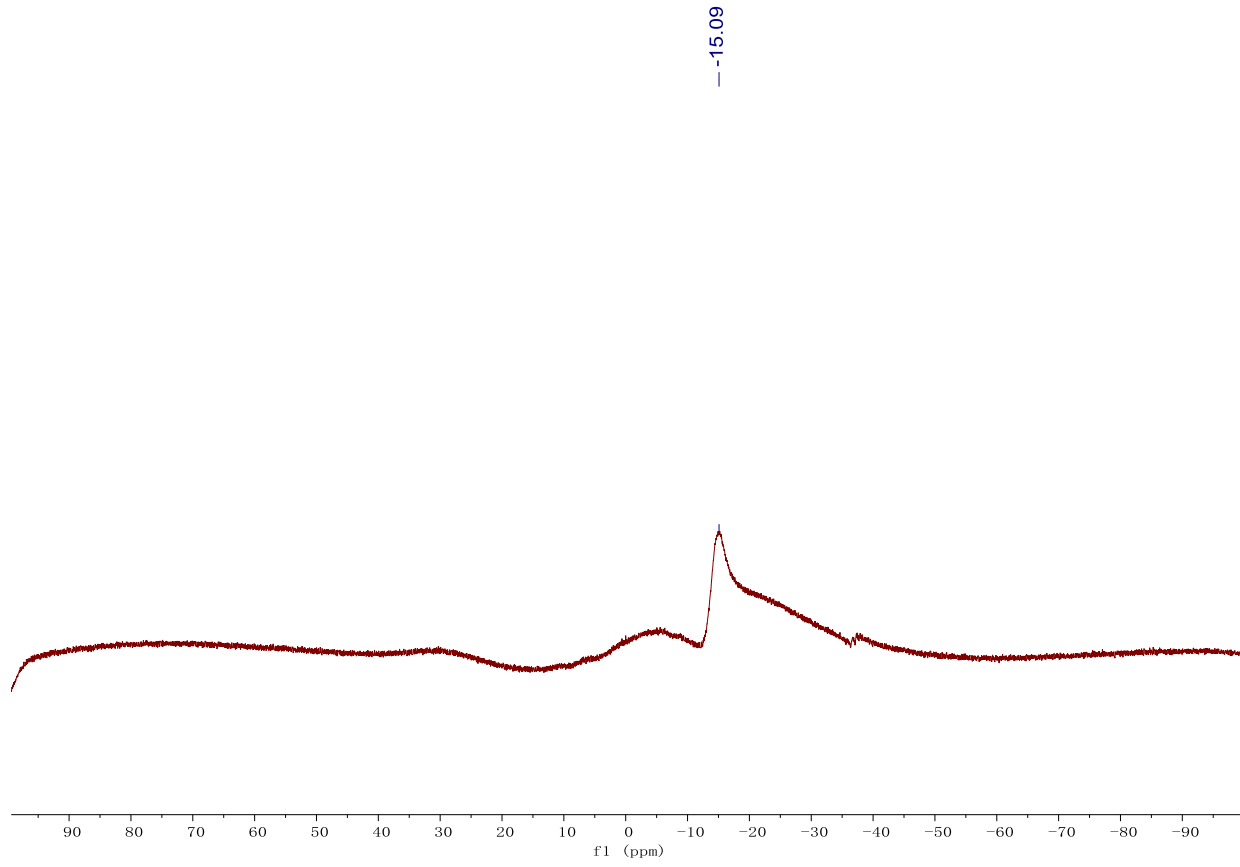

$^1\text{H}$  NMR and  $^{13}\text{C}$  NMR spectrum of compound **3aa**

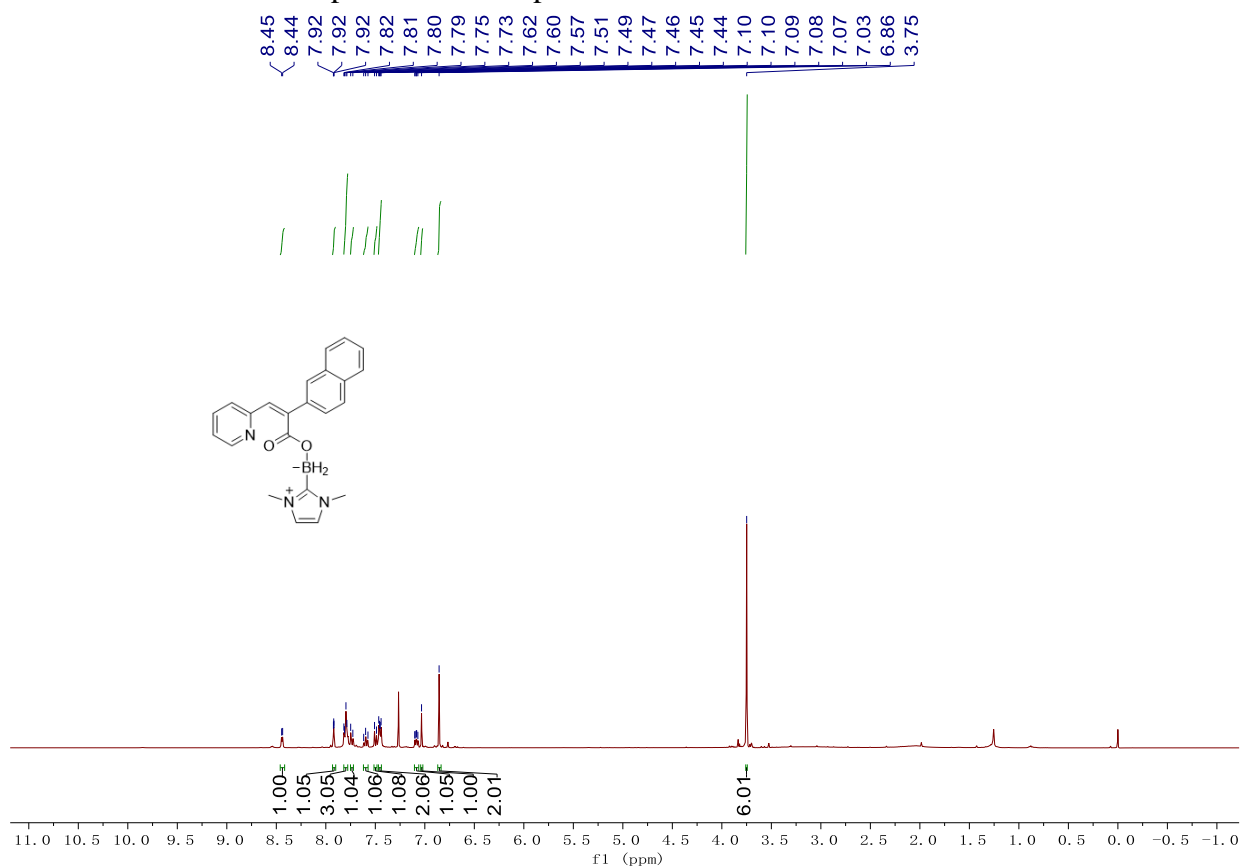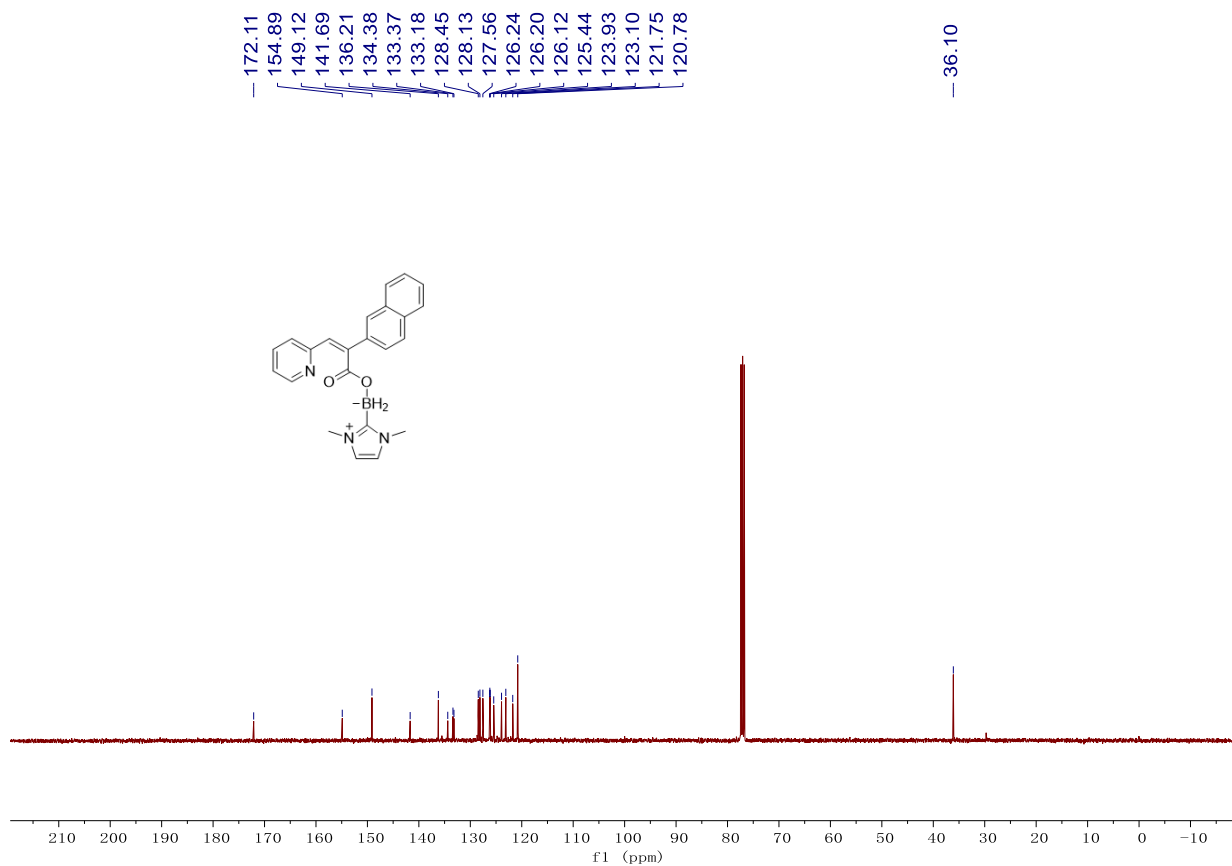

$^{11}\text{B}$  NMR spectrum of compound **3aa**

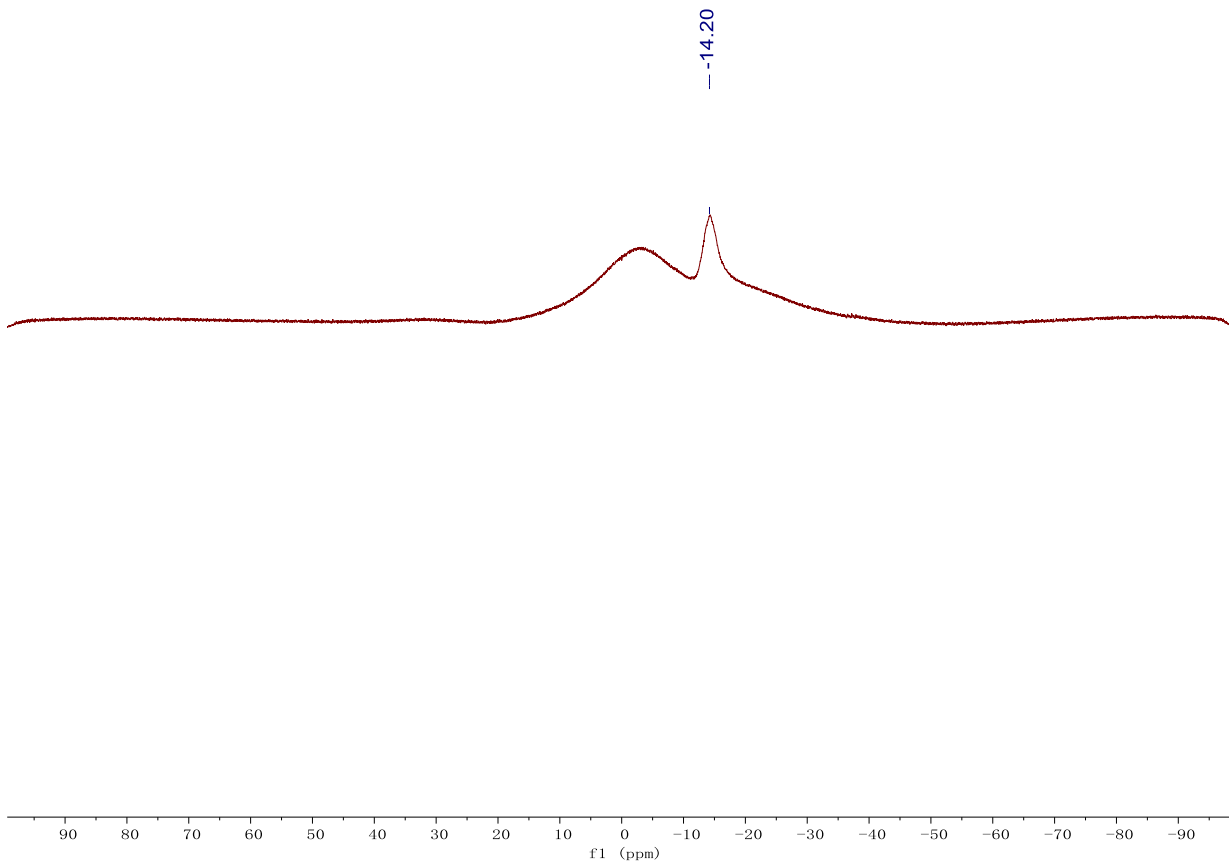

$^1\text{H}$  NMR and  $^{13}\text{C}$  NMR spectrum of compound **4a**

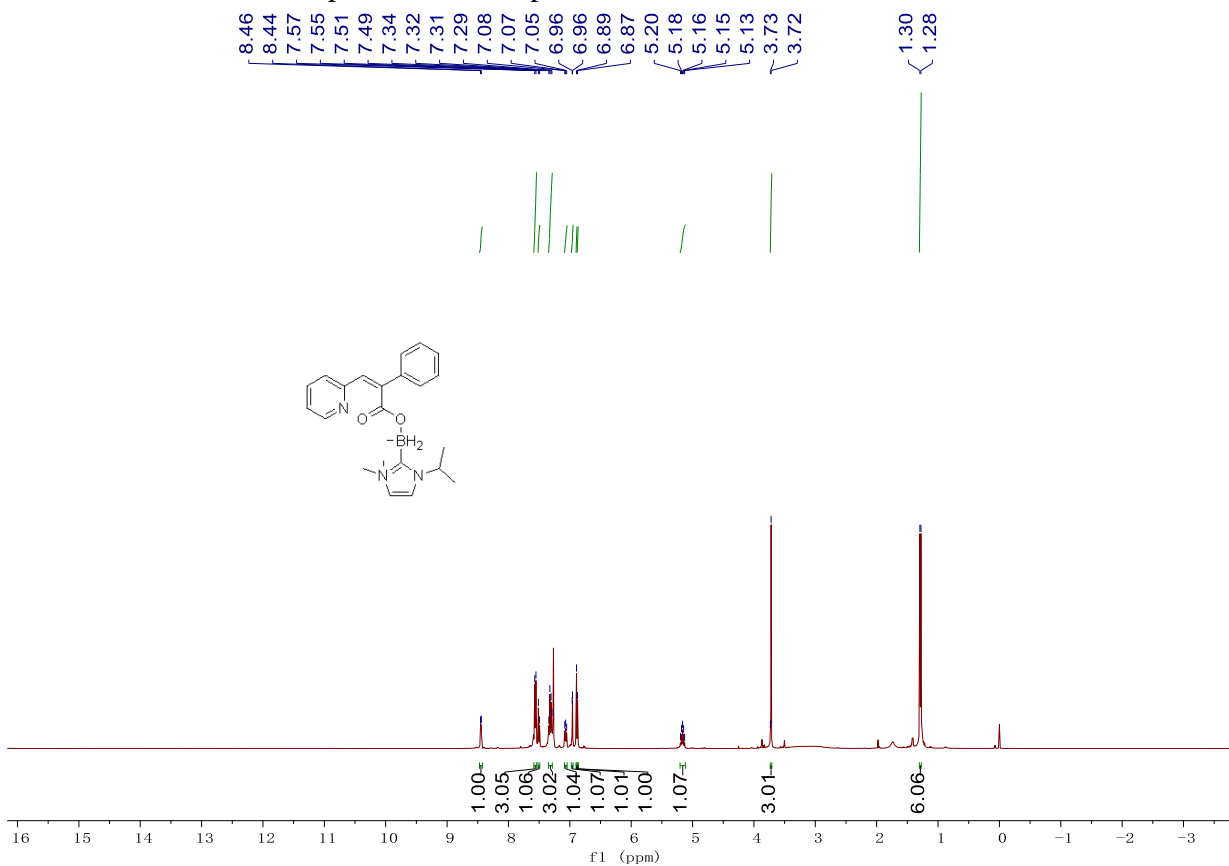



— 171.94  
154.87  
149.10  
141.83  
137.08  
136.16  
128.48  
128.23  
126.46  
125.24  
122.88  
121.70  
121.35  
115.44

— 50.05  
— 35.90  
— 23.02

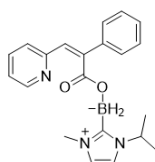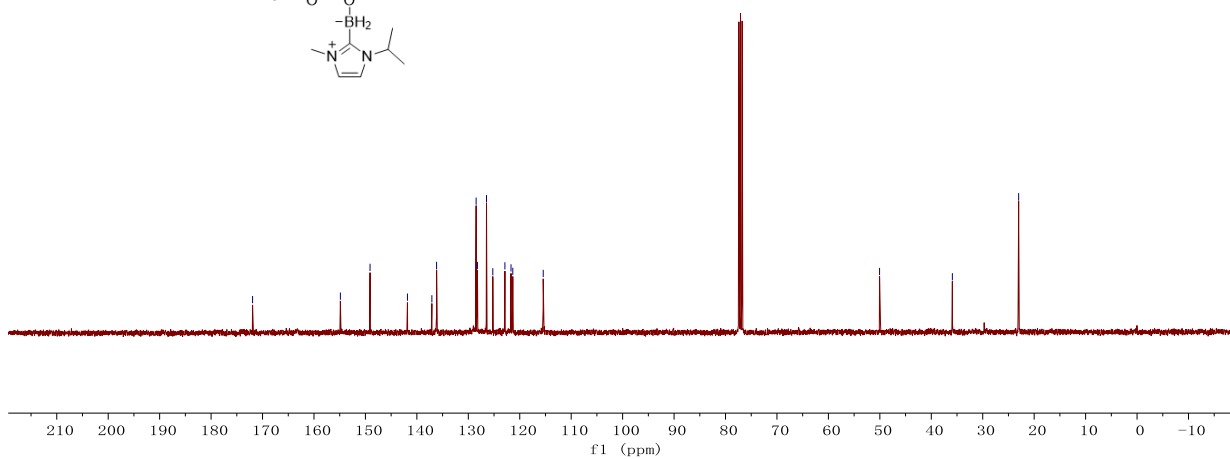

<sup>11</sup>B NMR spectrum of compound **4a**

— -15.17

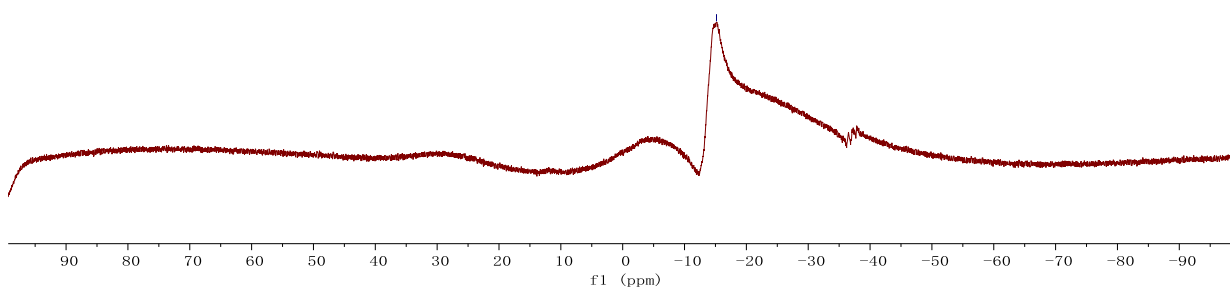

## 4. X-ray crystallographic data

Figure S1 X-ray single crystal structure of **3w**

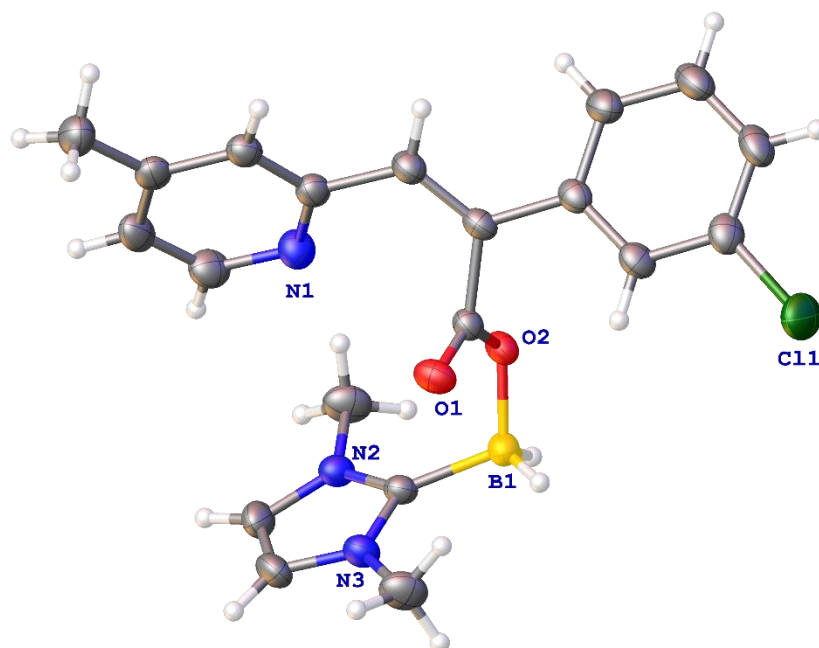

Single crystals of **3w** were grown by slow evaporation of its DCM/PE solution. Single-crystal X-ray diffraction data were collected with a 'multiwire proportional' diffractometer. The crystal was kept at 149.99 K during data collection. Using Olex2, the structure was solved with the olex2.solve structure solution program using Charge Flipping and refined with the olex2.refine refinement package using Least Squares minimization. Supplementary crystallographic data have been deposited at the Cambridge Crystallographic Data Center (CCDC 2116778).

**Table S1** Crystal data and structure refinement for **3w**

|                                       |                                                                  |
|---------------------------------------|------------------------------------------------------------------|
| Identification code                   | 2-477                                                            |
| Empirical formula                     | C <sub>20</sub> H <sub>21</sub> BClN <sub>3</sub> O <sub>2</sub> |
| Formula weight                        | 381.66                                                           |
| Temperature/K                         | 149.99(10)                                                       |
| Crystal system                        | monoclinic                                                       |
| Space group                           | Cc                                                               |
| a/Å                                   | 13.0381(3)                                                       |
| b/Å                                   | 20.5925(7)                                                       |
| c/Å                                   | 7.15692(19)                                                      |
| $\alpha$ /°                           | 90                                                               |
| $\beta$ /°                            | 91.598(3)                                                        |
| $\gamma$ /°                           | 90                                                               |
| Volume/Å <sup>3</sup>                 | 1920.80(10)                                                      |
| Z                                     | 4                                                                |
| $\rho_{\text{calc}}$ /cm <sup>3</sup> | 1.320                                                            |
| $\mu$ /mm <sup>-1</sup>               | 1.920                                                            |

|                                                  |                                                                      |
|--------------------------------------------------|----------------------------------------------------------------------|
| F(000)                                           | 800.0                                                                |
| Crystal size/mm <sup>3</sup>                     | 0.14 × 0.11 × 0.09                                                   |
| Radiation                                        | Cu K $\alpha$ ( $\lambda$ = 1.54184)                                 |
| 2 $\theta$ range for data collection/ $^{\circ}$ | 8.028 to 147.396                                                     |
| Index ranges                                     | -14 $\leq$ h $\leq$ 16, -25 $\leq$ k $\leq$ 20, -6 $\leq$ l $\leq$ 8 |
| Reflections collected                            | 3641                                                                 |
| Independent reflections                          | 2528 [R <sub>int</sub> = 0.0275, R <sub>sigma</sub> = 0.0389]        |
| Data/restraints/parameters                       | 2528/2/248                                                           |
| Goodness-of-fit on F <sup>2</sup>                | 1.073                                                                |
| Final R indexes [I $\geq$ 2 $\sigma$ (I)]        | R <sub>1</sub> = 0.0346, wR <sub>2</sub> = 0.0857                    |
| Final R indexes [all data]                       | R <sub>1</sub> = 0.0361, wR <sub>2</sub> = 0.0880                    |
| Largest diff. peak/hole / e $\text{\AA}^{-3}$    | 0.17/-0.20                                                           |
| Flack parameter                                  | 0.02(2)                                                              |

**Table S2** Bond Lengths for **3w**

| Atom | Atom | Length/ $\text{\AA}$ | Atom | Atom | Length/ $\text{\AA}$ |
|------|------|----------------------|------|------|----------------------|
| C11  | C12  | 1.744(3)             | C9   | C20  | 1.399(4)             |
| O1   | C8   | 1.216(3)             | N2   | C18  | 1.456(4)             |
| O2   | C8   | 1.309(3)             | N3   | C14  | 1.352(3)             |
| O2   | B1   | 1.526(4)             | N3   | C16  | 1.379(4)             |
| N1   | C1   | 1.351(4)             | N3   | C17  | 1.457(4)             |
| N1   | C5   | 1.335(4)             | C1   | C2   | 1.381(4)             |
| N2   | C14  | 1.343(3)             | C1   | C6   | 1.476(3)             |
| N2   | C15  | 1.374(4)             | C2   | C3   | 1.397(4)             |
| C3   | C4   | 1.377(5)             | C10  | C11  | 1.386(5)             |
| C3   | C19  | 1.495(4)             | C11  | C12  | 1.381(4)             |
| C4   | C5   | 1.389(5)             | C12  | C13  | 1.389(4)             |
| C6   | C7   | 1.339(4)             | C13  | C20  | 1.398(4)             |
| C7   | C8   | 1.514(4)             | C14  | B1   | 1.622(4)             |
| C7   | C20  | 1.482(3)             | C15  | C16  | 1.343(5)             |
| C9   | C10  | 1.398(4)             |      |      |                      |

**Table S3** Bond Angles for **3w**

| Atom | Atom | Atom | Angle/ $^{\circ}$ | Atom | Atom | Atom | Angle/ $^{\circ}$ |
|------|------|------|-------------------|------|------|------|-------------------|
| C8   | O2   | B1   | 118.5(2)          | C20  | C7   | C8   | 114.7(2)          |
| C5   | N1   | C1   | 116.2(3)          | O1   | C8   | O2   | 125.6(2)          |
| C14  | N2   | C15  | 111.0(2)          | O1   | C8   | C7   | 120.9(2)          |
| C14  | N2   | C18  | 124.4(2)          | O2   | C8   | C7   | 113.3(2)          |
| C15  | N2   | C18  | 124.5(3)          | C10  | C9   | C20  | 120.0(3)          |
| C14  | N3   | C16  | 110.2(2)          | C11  | C10  | C9   | 120.9(3)          |

|     |    |     |          |     |     |     |          |
|-----|----|-----|----------|-----|-----|-----|----------|
| C14 | N3 | C17 | 125.9(2) | C12 | C11 | C10 | 118.4(3) |
| C16 | N3 | C17 | 123.9(2) | C11 | C12 | C11 | 120.1(2) |
| N1  | C1 | C2  | 123.0(3) | C11 | C12 | C13 | 122.2(3) |
| N1  | C1 | C6  | 117.2(3) | C13 | C12 | C11 | 117.7(2) |
| C2  | C1 | C6  | 119.7(3) | C12 | C13 | C20 | 119.4(3) |
| C1  | C2 | C3  | 120.2(3) | N2  | C14 | N3  | 105.2(2) |
| C2  | C3 | C19 | 122.3(3) | N2  | C14 | B1  | 126.1(2) |
| C4  | C3 | C2  | 116.6(3) | N3  | C14 | B1  | 128.7(2) |
| C4  | C3 | C19 | 121.2(3) | C16 | C15 | N2  | 106.6(3) |
| C3  | C4 | C5  | 119.9(3) | C15 | C16 | N3  | 107.1(2) |
| N1  | C5 | C4  | 123.9(3) | C9  | C20 | C7  | 121.6(2) |
| C7  | C6 | C1  | 125.3(2) | C13 | C20 | C7  | 119.3(2) |
| C6  | C7 | C8  | 122.5(2) | C13 | C20 | C9  | 119.1(2) |
| C6  | C7 | C20 | 122.4(2) | O2  | B1  | C14 | 110.2(2) |

## 5. References

1. H. Cao, H. Zhan, Y. Lin, X. Lin, Z. Du, H. Jiang, *Org. Lett.* **2012**, 14, 1688–1691.
2. H. Zhan, L. Zhao, N. Li, L. Chen, J. Liu, J. Liao, H. Cao, *RSC Adv.* **2014**, 4, 32013–32016.
3. S. Gardner, T. Kawamoto, Dennis P. Curran, *J. Org. Chem.* **2015**, 80, 9794–9797
